# Supplementary material for: Supersonic jet chirped pulse microwave spectroscopy of ring-like methanol : water pentamers
Source: Royal Society of Chemistry journal article supplement (doi:10.1039/d3cp03005a), 2023-01-01
Supplement: d3cp03005a1.pdf [file d3cp03005a1.pdf]

Supplemental Information for: "Supersonic Jet Chirped Pulse Microwave Spectroscopy of Ring-Like  
Methanol:Water Pentamers"

Additional tables of fits and fitting information is included in this document. Images of every conformer and calculated O-O distances for each conformer are also included for reference.

Sections:

1. Tables of D<sub>2</sub>O, D<sub>4</sub>, and HDO *ab initio* and fitted constants
2. Kraitchman Substitution Results and Calculated O-O Distances
3. Images of Geometry Optimized Conformers
4. Final SPFIT Results
5. Double Resonance Connections

### Section 1: Tables of D2O, D4, and HDO ab initio and fitted constants

Reported here are tables with rotational constants, distortion constants, dipole moment, and relative energy ordering calculated with B3LYP/6-311++G(d,p) followed by the experimentally fit rotational constants with number of lines used and rms error for each fit. The fits were performed with spfit and the values in parentheses are the errors reported by the fitting program.

| D4                 | Ab initio | Experimental |
|--------------------|-----------|--------------|
| A /MHz             | 568.085   | 568.07 (13)  |
| B /MHz             | 558.812   | 558.80 (8)   |
| C /MHz             | 342.082   | 342.06 (8)   |
| $\Delta_J$ /kHz    | 1.49E-01  | -            |
| $\Delta_K$ /kHz    | -2.23E-01 | -            |
| $\Delta_{JK}$ /kHz | 1.77E-01  | -            |
| $\delta_J$ /kHz    | 1.44E-03  | -            |
| $\delta_K$ /kHz    | 7.73E+00  | -            |
| $\mu_A$ /D         | -0.29     | y            |
| $\mu_B$ /D         | 0.10      | y            |
| $\mu_C$ /D         | 0.63      | y            |
| N                  | -         | 19           |
| Error /kHz         | -         | 36           |

SI Table 1. Calculated and fitted constants for the (CD<sub>3</sub>OD)<sub>5</sub> isotopologue conformers.

| Ab initio                 | wdudu       | wudu        | wuudu      | wduud       | wudud       |
|---------------------------|-------------|-------------|------------|-------------|-------------|
| A /MHz                    | 882.995     | 892.738     | 885.074    | 870.248     | 889.992     |
| B /MHz                    | 683.627     | 686.911     | 697.47     | 725.958     | 679.818     |
| C /MHz                    | 464.58      | 452.929     | 449.691    | 438.869     | 460.168     |
| $\Delta_J$ /kHz           | 2.43E-01    | 3.59E-01    | 1.28E+00   | 1.43E+00    | 2.49E-01    |
| $\Delta_K$ /kHz           | 5.03E-02    | 2.64E-01    | 4.26E+00   | 5.61E+00    | 1.05E-01    |
| $\Delta_{JK}$ /kHz        | -4.67E-02   | -4.32E-01   | -5.28E+00  | -6.92E+00   | -8.45E-02   |
| $\delta_J$ /kHz           | 2.44E-02    | 1.97E-02    | 1.79E-02   | 8.98E-03    | 3.03E-02    |
| $\delta_K$ /kHz           | 4.32E-01    | 1.74E-01    | -4.73E+00  | -1.00E+01   | 3.64E-01    |
| $\mu_A$ /D                | 0.17        | -0.27       | 0.31       | -0.12       | -0.18       |
| $\mu_B$ /D                | -0.015      | 0.0082      | -0.016     | 0.53        | 0.025       |
| $\mu_C$ /D                | -0.84       | 0.47        | 0.49       | 0.63        | -0.87       |
| Rel. E. /cm <sup>-1</sup> | 0.0         | 20.0        | 33.4       | 37.6        | 55.1        |
| Experimental              | wdudu       | wudu        | wuudu      | wduud       | wudud       |
| A /MHz                    | 882.46 (10) | 893.10 (21) | 884.95 (4) | 870.17 (10) | 890.27 (15) |
| B /MHz                    | 684.23 (7)  | 685.62 (6)  | 697.46 (6) | 725.48 (13) | 678.50 (8)  |
| C /MHz                    | 464.56 (8)  | 453.13 (9)  | 449.72 (4) | 438.74 (7)  | 460.16 (7)  |
| $\mu_A$ /D                | y           | y           | y          | y           | y           |
| $\mu_B$ /D                | n           | n           | y          | y           | n           |
| $\mu_C$ /D                | y           | y           | y          | y           | y           |
| N                         | 15          | 16          | 24         | 19          | 15          |
| Error /kHz                | 22          | 29          | 66         | 87          | 84          |

SI Table 2. Calculated and fitted constants for the (D<sub>2</sub>O)(CH<sub>3</sub>OH)<sub>4</sub> isotopologue conformers.

| Ab initio                 | wduud       | wudud       | wuudu       | wuduu       | wdudu       |
|---------------------------|-------------|-------------|-------------|-------------|-------------|
| A /MHz                    | 770.634     | 790.928     | 787.373     | 795.453     | 784.956     |
| B /MHz                    | 623.875     | 575.115     | 593.838     | 582.456     | 577.767     |
| C /MHz                    | 382.28      | 405.3       | 393.949     | 397.554     | 409.831     |
| $\Delta_J$ /kHz           | 1.12E+00    | 1.85E-01    | 8.76E-01    | 3.01E-01    | 1.85E-01    |
| $\Delta_K$ /kHz           | 4.39E+00    | 5.88E-02    | 2.60E+00    | 2.58E-01    | 5.88E-02    |
| $\Delta_{JK}$ /kHz        | -5.41E+00   | 9.57E-03    | -3.26E+00   | -3.95E-01   | 3.57E-01    |
| $\delta_J$ /kHz           | 1.70E-02    | 2.54E-02    | 2.37E-02    | 1.35E-02    | 2.54E-02    |
| $\delta_K$ /kHz           | -6.68E+00   | 3.07E-01    | -2.12E+00   | 9.99E-02    | 3.12E-01    |
| $\mu_A$ /D                | -0.14       | 0.21        | 0.28        | -0.30       | 0.20        |
| $\mu_B$ /D                | 0.54        | -0.011      | -0.020      | -0.0066     | 0.0023      |
| $\mu_C$ /D                | 0.62        | -0.89       | 0.51        | 0.45        | -0.84       |
| Rel. E. /cm <sup>-1</sup> | 0.0         | 4.8         | 24.6        | 67.6        | 84.8        |
| Experimental              | wduud       | wudud       | wuudu       | wuduu       | wdudu       |
| A /MHz                    | 771.05 (9)  | 790.73 (11) | 787.10 (10) | 794.77 (12) | 785.23 (3)  |
| B /MHz                    | 623.79 (14) | 575.11 (10) | 592.98 (9)  | 585.09 (12) | 577.81 (12) |
| C /MHz                    | 382.28 (4)  | 405.50 (7)  | 394.21 (11) | 397.51 (15) | 410.00 (11) |
| $\mu_A$ /D                | y           | y           | y           | y           | y           |
| $\mu_B$ /D                | y           | n           | n           | n           | n           |
| $\mu_C$ /D                | y           | y           | y           | y           | y           |
| N                         | 20          | 13          | 14          | 15          | 14          |
| Error /kHz                | 7.6         | 18          | 31          | 37          | 61          |

SI Table 3. Calculated and fitted constants for the (H<sub>2</sub>O)(CD<sub>3</sub>OD)<sub>4</sub> isotopologue conformers.

| Ab initio                 | wduud       | wudud       | wuudu       | wuduu       | wdudu      |
|---------------------------|-------------|-------------|-------------|-------------|------------|
| A /MHz                    | 886.658     | 907.611     | 902.367     | 910.315     | 900.677    |
| B /MHz                    | 729.693     | 680.71      | 699.631     | 688.583     | 684.19     |
| C /MHz                    | 441.669     | 464.425     | 453.202     | 456.688     | 469.169    |
| $\Delta_J$ /kHz           | 1.48E+00    | 2.54E-01    | 1.31E+00    | 3.79E-01    | 2.48E-01   |
| $\Delta_K$ /kHz           | 5.82E+00    | 9.91E-02    | 4.30E+00    | 2.90E-01    | 3.78E-02   |
| $\Delta_{JK}$ /kHz        | -7.17E+00   | -6.44E-02   | -5.34E+00   | -4.72E-01   | 4.42E-01   |
| $\delta_J$ /kHz           | 1.07E-02    | 3.17E-02    | 1.88E-02    | 2.10E-02    | 2.71E-02   |
| $\delta_K$ /kHz           | -9.71E+00   | 3.87E-01    | -4.42E+00   | 1.62E-01    | 4.41E-01   |
| $\mu_A$ /D                | -0.14       | -0.21       | 0.29        | -0.29       | 0.21       |
| $\mu_B$ /D                | 0.53        | -0.012      | -0.0076     | 0.0066      | 0.0007     |
| $\mu_C$ /D                | 0.64        | -0.89       | 0.53        | 0.47        | -0.84      |
| Rel. E. /cm <sup>-1</sup> | 0.0         | 8.6         | 19.3        | 66.5        | 88.1       |
| Experimental              | wduud       | wudud       | wuudu       | wuduu       | wdudu      |
| A /MHz                    | 886.79 (13) | 908.06 (4)  | 902.59 (3)  | 910.57 (10) | 900.68 (9) |
| B /MHz                    | 729.41 (16) | 680.41 (26) | 699.44 (12) | 688.58 (28) | 684.12 (3) |
| C /MHz                    | 441.76 (5)  | 464.27 (6)  | 453.00 (27) | 456.66 (21) | 469.02 (6) |
| $\mu_A$ /D                | y           | y           | y           | y           | y          |
| $\mu_B$ /D                | y           | y           | y           | y           | y          |
| $\mu_C$ /D                | y           | n           | y           | y           | y          |
| N                         | 6           | 5           | 12          | 15          | 5          |
| Error /kHz                | 46          | 364         | 1345        | 99          | 211        |

SI Table 4. Calculated and fitted constants for the (HDO)(CH<sub>3</sub>OH)<sub>4</sub> isotopologue conformers.

| Ab initio        | wwduu        | wuwuu        | wwuud       | wwdud       | wuwud       | wwudu       | wuwdu       |
|------------------|--------------|--------------|-------------|-------------|-------------|-------------|-------------|
| A /MHz           | 1092.66      | 1136.68      | 1082.5      | 1021.56     | 1160.711    | 1040.101    | 1151.373    |
| B /MHz           | 814.721      | 771.467      | 831.888     | 838.828     | 744.375     | 826.279     | 754.495     |
| C /MHz           | 516.441      | 506.493      | 510.202     | 552.976     | 505.89      | 540.928     | 510.27      |
| $\Delta J$ /kHz  | 6.43E-01     | 5.90E-01     | 7.54E-01    | 6.21E-01    | 4.13E-01    | 7.34E-01    | 4.92E-01    |
| $\Delta K$ /kHz  | 1.20E+00     | -1.24E+00    | 1.29E+00    | 1.28E+00    | -8.18E-02   | 1.79E+00    | 1.86E-01    |
| $\Delta JK$ /kHz | -1.58E+00    | 8.21E-01     | -1.89E+00   | -1.57E+00   | -1.70E-01   | -2.10E+00   | -4.90E-01   |
| $\delta J$ /kHz  | 7.16E-02     | 8.22E-02     | 2.31E-02    | 5.49E-02    | 6.45E-02    | 1.13E-01    | 5.08E-02    |
| $\delta K$ /kHz  | -6.27E-01    | 1.96E+00     | -8.55E-01   | -1.15E+00   | 3.72E-01    | -1.56E+00   | 1.76E-01    |
| $\mu_A$ /D       | 0.44         | -0.32        | -0.35       | -0.060      | -0.28       | 0.19        | 0.13        |
| $\mu_B$ /D       | -0.30        | -0.083       | -0.36       | -0.10       | 0.22        | -0.029      | 0.11        |
| $\mu_C$ /D       | 0.47         | 0.41         | 0.56        | -1.03       | -0.70       | 0.78        | -0.74       |
| Rel. E. /cm-1    | 0.0          | 0.4          | 19.5        | 34.9        | 45.5        | 53.1        | 84.6        |
| Experimental     | wwduu        | wuwuu        | wwuud       | wwdud       | wuwud       | wwudu       | wuwdu       |
| A /MHz           | 1092.72 (14) | 1139.53 (11) | 1083.03 (6) | 1021.48 (7) | 1160.51 (4) | 1040.12 (9) | 1153.38 (4) |
| B /MHz           | 814.59 (20)  | 770.44 (3)   | 831.53 (4)  | 838.80 (8)  | 744.32 (12) | 826.19 (4)  | 753.83 (13) |
| C /MHz           | 516.27 (4)   | 506.48 (6)   | 510.17 (28) | 552.91 (5)  | 505.76 (5)  | 540.76 (6)  | 510.32 (24) |
| $\mu_A$ /D       | y            | y            | y           | n           | y           | n           | y           |
| $\mu_B$ /D       | y            | y            | y           | y           | n           | y           | y           |
| $\mu_C$ /D       | y            | y            | y           | y           | y           | y           | y           |
| N                | 4            | 9            | 11          | 4           | 4           | 5           | 10          |
| Error /kHz       | 35           | 38           | 41          | 123         | 220         | 211         | 22          |

SI Table 5. Calculated and fitted constants for the  $(D_2O)_2(CH_3OH)_3$  isotopologue conformers.

| Ab initio        | wuwuu        | wwduu       | wwuud       | wwdud       | wuwud        | wwudu       | wuwdu       |
|------------------|--------------|-------------|-------------|-------------|--------------|-------------|-------------|
| A /MHz           | 1075.106     | 1049.482    | 1044.785    | 965.155     | 1092.464     | 985.474     | 1082.715    |
| B /MHz           | 671.894      | 713.533     | 727.624     | 739.637     | 646.672      | 725.291     | 657.236     |
| C /MHz           | 457.207      | 472.832     | 466.337     | 513.368     | 452.655      | 500.473     | 457.208     |
| $\Delta J$ /kHz  | 5.65E-01     | 6.01E-01    | 6.93E-01    | 5.90E-01    | 3.45E-01     | 7.40E-01    | 4.24E-01    |
| $\Delta K$ /kHz  | -1.60E+00    | 1.22E+00    | 1.24E+00    | 1.35E+00    | -2.90E-01    | 2.04E+00    | 2.44E-02    |
| $\Delta JK$ /kHz | 1.20E+00     | -1.57E+00   | -1.79E+00   | -1.62E+00   | 7.97E-02     | -2.33E+00   | -2.87E-01   |
| $\delta J$ /kHz  | 9.64E-02     | 9.60E-02    | 4.29E-02    | 7.59E-02    | 5.65E-02     | 1.52E-01    | 4.34E-02    |
| $\delta K$ /kHz  | 1.96E+00     | -5.43E-01   | -6.37E-01   | -1.01E+00   | 4.45E-01     | -1.51E+00   | 2.20E-01    |
| $\mu_A$ /D       | -0.28        | 0.40        | -0.38       | -0.027      | -0.24        | 0.16        | 0.17        |
| $\mu_B$ /D       | -0.061       | -0.31       | -0.34       | -0.087      | 0.22         | -0.014      | 0.14        |
| $\mu_C$ /D       | 0.39         | 0.47        | 0.57        | -1.04       | -0.67        | 0.76        | -0.72       |
| Rel. E. /cm-1    | 0.0          | 5.5         | 22.2        | 24.4        | 39.8         | 49.9        | 78.6        |
| Experimental     | wuwuu        | wwduu       | wwuud       | wwdud       | wuwud        | wwudu       | wuwdu       |
| A /MHz           | 1068.31 (18) | 1049.54 (7) | 1045.20 (5) | 964.96 (13) | 1092.62 (22) | 985.44 (10) | 1083.57 (6) |
| B /MHz           | 673.87 (6)   | 713.47 (23) | 727.43 (18) | 739.71 (29) | 646.52 (5)   | 725.20 (7)  | 656.88 (16) |
| C /MHz           | 457.36 (4)   | 472.77 (15) | 466.29 (4)  | 513.24 (4)  | 452.42 (3)   | 500.20 (28) | 456.99 (5)  |
| $\mu_A$ /D       | y            | y           | y           | y           | y            | y           | n           |
| $\mu_B$ /D       | y            | y           | y           | y           | y            | y           | y           |
| $\mu_C$ /D       | y            | y           | y           | y           | y            | y           | y           |
| N                | 11           | 10          | 10          | 10          | 5            | 4           | 4           |
| Error /kHz       | 101          | 7.9         | 85          | 22          | 512          | 13          | 365         |

SI Table 6. Calculated and fitted constants for the  $(H_2O)_2(CD_3OD)_3$  isotopologue conformers.

| Ab initio        | wuwuu        | wwduu       | wwuud     | wwdud        | wuwud        | wwudu        | wuwdu        |
|------------------|--------------|-------------|-----------|--------------|--------------|--------------|--------------|
| A /MHz           | 1194.66      | 1144.26     | 1136.665  | 1065.697     | 1217.936     | 1085.752     | 1208.863     |
| B /MHz           | 778.983      | 829.35      | 845.323   | 856.08       | 751.859      | 841.11       | 761.839      |
| C /MHz           | 517.125      | 530.176     | 523.437   | 569.988      | 514.848      | 557.139      | 519.806      |
| $\Delta J$ /kHz  | 6.64E-01     | 7.19E-01    | 8.34E-01  | 7.00E-01     | 4.49E-01     | 8.28E-01     | 5.31E-01     |
| $\Delta K$ /kHz  | -1.52E+00    | 1.39E+00    | 1.46E+00  | 1.45E+00     | -1.65E-01    | 2.10E+00     | 1.26E-01     |
| $\Delta JK$ /kHz | 1.04E+00     | -1.83E+00   | -2.12E+00 | -1.79E+00    | -1.19E-01    | -2.44E+00    | -4.59E-01    |
| $\delta J$ /kHz  | 1.03E-01     | 9.25E-02    | 3.63E-02  | 7.12E-02     | 7.46E-02     | 1.41E-01     | 6.11E-02     |
| $\delta K$ /kHz  | 2.16E+00     | -7.15E-01   | -8.94E-01 | -1.20E+00    | 4.38E-01     | -1.72E+00    | 2.28E-01     |
| $\mu_A$ /D       | -0.28        | 0.41        | -0.38     | -0.036       | 0.24         | 0.16         | 0.17         |
| $\mu_B$ /D       | -0.062       | -0.31       | -0.34     | -0.089       | 0.22         | -0.014       | 0.14         |
| $\mu_C$ /D       | 0.39         | 0.47        | 0.57      | -1.04        | 0.67         | 0.76         | -0.72        |
| Rel. E. /cm-1    | 0.0          | 0.7         | 19.8      | 28.8         | 43.5         | 51.2         | 80.8         |
| Experimental     | wuwuu        | wwduu       | wwuud     | wwdud        | wuwud        | wwudu        | wuwdu        |
| A /MHz           | 1194.24 (13) | 1144.25 (7) | -         | 1065.75 (17) | 1217.61 (26) | 1085.72 (20) | 1209.17 (25) |
| B /MHz           | 778.92 (16)  | 829.27 (8)  | -         | 855.96 (16)  | 751.84 (7)   | 841.06 (14)  | 761.61 (12)  |
| C /MHz           | 516.64 (4)   | 529.87 (4)  | -         | 569.86 (13)  | 514.67 (4)   | 557.02 (9)   | 519.53 (5)   |
| $\mu_A$ /D       | y            | y           | -         | n            | y            | y            | y            |
| $\mu_B$ /D       | y            | y           | -         | y            | n            | y            | y            |
| $\mu_C$ /D       | y            | y           | -         | y            | y            | n            | y            |
| N                | 4            | 6           | -         | 4            | 4            | 4            | 4            |
| Error /kHz       | 1486         | 182         | -         | 11           | 71           | 223          | 348          |

SI Table 7. Calculated and fitted constants for the (HDO)(H<sub>2</sub>O)(CH<sub>3</sub>OH)<sub>3</sub> isotopologue conformers.

| Ab initio        | wwudd       | wwdww     | wwuwu        | wwwwu        | wwuwud       | wwwwud       | wwdwwd    |
|------------------|-------------|-----------|--------------|--------------|--------------|--------------|-----------|
| A /MHz           | 1212.914    | 1556.513  | 1502.66      | 1183.054     | 1560.575     | 1173.188     | 1476.019  |
| B /MHz           | 1076.859    | 844.342   | 859.945      | 1081.603     | 850.31       | 1082.469     | 874.642   |
| C /MHz           | 603.85      | 583.942   | 592.01       | 622.391      | 587.443      | 634.822      | 603.259   |
| $\Delta J$ /kHz  | 6.77E-01    | 2.96E-01  | 1.42E+00     | 6.17E-01     | 3.03E-01     | 5.60E-01     | 1.42E+00  |
| $\Delta K$ /kHz  | -1.66E+00   | 1.57E+00  | 2.89E+00     | -8.53E-01    | 8.56E-01     | -1.59E-01    | 2.94E+00  |
| $\Delta JK$ /kHz | 1.15E+00    | -1.90E-01 | -4.04E+00    | -3.34E-01    | 1.28E-01     | -9.82E-02    | -4.03E+00 |
| $\delta J$ /kHz  | 5.47E-02    | 6.80E-02  | 3.87E-01     | 3.41E-02     | 6.81E-02     | 9.48E-03     | 3.16E-01  |
| $\delta K$ /kHz  | 8.69E+00    | -1.30E-01 | -1.87E+00    | 3.43E+00     | -1.70E-01    | 4.22E+00     | -1.94E+00 |
| $\mu_A$ /D       | 0.54        | -0.45     | -0.15        | 0.35         | -0.28        | -0.044       | -0.18     |
| $\mu_B$ /D       | -0.0029     | -0.13     | -0.25        | -0.32        | -0.23        | -0.16        | -0.15     |
| $\mu_C$ /D       | 0.44        | -0.77     | 0.63         | -0.81        | 0.83         | -0.94        | 0.64      |
| Rel. E. /cm-1    | 0.0         | 6.4       | 57.5         | 63.7         | 72.0         | 74.0         | 101.0     |
| Experimental     | wwudd       | wwdww     | wwuwu        | wwwwu        | wwuwud       | wwwwud       | wwdwwd    |
| A /MHz           | 1212.93 (9) | -         | 1502.66 (13) | 1183.09 (25) | 1560.55 (12) | 1173.54 (11) | -         |
| B /MHz           | 1076.72 (4) | -         | 859.96 (17)  | 1081.65 (15) | 850.27 (21)  | 1082.29 (9)  | -         |
| C /MHz           | 603.74 (10) | -         | 591.76 (20)  | 622.56 (3)   | 587.36 (5)   | 634.44 (4)   | -         |
| $\mu_A$ /D       | y           | -         | y            | y            | y            | y            | -         |
| $\mu_B$ /D       | y           | -         | n            | y            | y            | y            | -         |
| $\mu_C$ /D       | n           | -         | y            | n            | y            | y            | -         |
| N                | 4           | -         | 4            | 12           | 6            | 10           | -         |
| Error /kHz       | 64          | -         | 244          | 3.8          | 32           | 20           | -         |

SI Table 8. Calculated and fitted constants for the (D<sub>2</sub>O)<sub>3</sub>(CH<sub>3</sub>OH)<sub>2</sub> isotopologue conformers.

| Ab initio        | wwdww        | wwwdd       | wwuwu        | wwwdu     | wwuud        | wwwud       | wwdwd       |
|------------------|--------------|-------------|--------------|-----------|--------------|-------------|-------------|
| A /MHz           | 1653.203     | 1169.31     | 1579.279     | 1131.072  | 1664.598     | 1116.305    | 1541.017    |
| B /MHz           | 746.173      | 1050.833    | 763.41       | 1056.898  | 750.156      | 1065.689    | 780.632     |
| C /MHz           | 547.438      | 586.644     | 557.885      | 605.682   | 550.809      | 617.93      | 570.952     |
| $\Delta J$ /kHz  | 2.64E-01     | 7.72E-01    | 4.80E-01     | 6.92E-01  | 2.59E-01     | 5.34E-01    | 5.85E-01    |
| $\Delta K$ /kHz  | 2.42E+00     | -1.73E+00   | 4.43E+00     | 5.23E-01  | 1.03E+00     | -3.02E-01   | 4.14E+00    |
| $\Delta JK$ /kHz | -3.20E-01    | 1.13E+00    | -1.75E+00    | -7.79E-01 | 1.93E-01     | 6.47E-02    | -1.95E+00   |
| $\delta J$ /kHz  | 5.33E-02     | 6.43E-02    | 8.04E-02     | 4.60E-02  | 4.89E-02     | 2.16E-04    | 1.01E-01    |
| $\delta K$ /kHz  | -6.29E-02    | 1.03E+01    | -6.26E-02    | 2.58E+00  | -8.74E-02    | 8.22E+00    | -6.97E-02   |
| $\mu_A/D$        | -0.41        | 0.51        | -0.19        | 0.31      | -0.33        | -0.016      | -0.14       |
| $\mu_B/D$        | -0.085       | 0.011       | -0.20        | -0.31     | -0.19        | -0.14       | -0.11       |
| $\mu_C/D$        | -0.77        | 0.44        | 0.63         | -0.80     | 0.84         | -0.92       | 0.64        |
| Rel. E. /cm-1    | 0.0          | 8.8         | 51.4         | 60.8      | 64.4         | 65.5        | 94.9        |
| Experimental     | wwdww        | wwwdd       | wwuwu        | wwwdu     | wwuud        | wwwud       | wwdwd       |
| A /MHz           | 1653.23 (25) | 1169.36 (7) | 1579.45 (26) | -         | 1664.24 (16) | 1112.59 (8) | 1540.47 (5) |
| B /MHz           | 746.09 (5)   | 1050.69 (4) | 763.24 (13)  | -         | 750.043 (4)  | 1068.93 (7) | 780.65 (11) |
| C /MHz           | 547.32 (4)   | 586.42 (9)  | 557.78 (5)   | -         | 550.80 (9)   | 617.96 (25) | 570.83 (4)  |
| $\mu_A/D$        | y            | n           | y            | -         | y            | n           | n           |
| $\mu_B/D$        | y            | y           | y            | -         | y            | y           | y           |
| $\mu_C/D$        | y            | y           | y            | -         | y            | y           | y           |
| N                | 4            | 5           | 4            | -         | 9            | 12          | 4           |
| Error /kHz       | 124          | 75          | 400          | -         | 35           | 36          | 39          |

SI Table 9. Calculated and fitted constants for the  $(H_2O)_3(CD_3OD)_2$  isotopologue conformers.

| Ab initio        | wwdww     | wwwdd     | wwuwu     | wwwdu     | wwuud     | wwwud        | wwdwd       |
|------------------|-----------|-----------|-----------|-----------|-----------|--------------|-------------|
| A /MHz           | 1702.438  | 1278.16   | 1638.89   | 1245.657  | 1710.932  | 1235.64      | 1605.489    |
| B /MHz           | 861.881   | 1142.421  | 878.418   | 1146.279  | 866.477   | 1150.44      | 895.375     |
| C /MHz           | 606.1     | 635.283   | 615.162   | 655.476   | 609.808   | 668.11       | 627.836     |
| $\Delta J$ /kHz  | 3.28E-01  | 7.61E-01  | 5.25E-01  | 6.76E-01  | 3.25E-01  | 6.55E-01     | 6.42E-01    |
| $\Delta K$ /kHz  | 2.26E+00  | -2.20E+00 | 3.85E+00  | -1.76E-02 | 1.09E+00  | -2.18E-01    | 3.77E+00    |
| $\Delta JK$ /kHz | -2.98E-01 | 1.62E+00  | -1.50E+00 | -1.80E-01 | 2.04E-01  | -1.07E-01    | -1.79E+00   |
| $\delta J$ /kHz  | 7.68E-02  | 6.61E-02  | 1.04E-01  | 3.59E-02  | 7.15E-02  | 1.36E-02     | 1.29E-01    |
| $\delta K$ /kHz  | -1.16E-01 | 1.18E+01  | -1.22E-01 | 5.06E+00  | -1.55E-01 | 5.65E+00     | -1.35E-01   |
| $\mu_A/D$        | -0.41     | 0.51      | -0.19     | -0.32     | 0.33      | -0.017       | -0.14       |
| $\mu_B/D$        | -0.085    | 0.0098    | -0.20     | -0.32     | -0.19     | -0.14        | -0.11       |
| $\mu_C/D$        | -0.77     | 0.44      | 0.64      | 0.80      | -0.84     | -0.92        | 0.64        |
| Rel. E. /cm-1    | 0.0       | 0.9       | 51.6      | 60.4      | 65.7      | 66.3         | 96.4        |
| Experimental     | wwdww     | wwwdd     | wwuwu     | wwwdu     | wwuud     | wwwud        | wwdwd       |
| A /MHz           | -         | -         | -         | -         | -         | 1235.39 (10) | 1605.51 (3) |
| B /MHz           | -         | -         | -         | -         | -         | 1150.78 (15) | 895.28 (8)  |
| C /MHz           | -         | -         | -         | -         | -         | 667.98 (19)  | 627.65 (4)  |
| $\mu_A/D$        | -         | -         | -         | -         | -         | y            | n           |
| $\mu_B/D$        | -         | -         | -         | -         | -         | y            | y           |
| $\mu_C/D$        | -         | -         | -         | -         | -         | n            | y           |
| N                | -         | -         | -         | -         | -         | 5            | 4           |
| Error /kHz       | -         | -         | -         | -         | -         | 80           | 18          |

SI Table 10. Calculated and fitted constants for the  $(HDO)(H_2O)_2(CH_3OH)_2$  isotopologue conformers.

| Ab initio        | wwwwu        | wwwwd'       | wwwwd        |
|------------------|--------------|--------------|--------------|
| A /MHz           | 1748.802     | 1684.05      | 1723.683     |
| B /MHz           | 1139.581     | 1173.7       | 1157.954     |
| C /MHz           | 715.919      | 744.609      | 728.64       |
| $\Delta J$ /kHz  | 1.59E+00     | 1.58E-03     | 1.86E+00     |
| $\Delta K$ /kHz  | 2.65E+00     | 2.58E-03     | 3.55E+00     |
| $\Delta JK$ /kHz | -4.03E+00    | -3.86E-03    | -5.08E+00    |
| $\delta J$ /kHz  | 3.35E-01     | 2.39E-04     | 3.32E-01     |
| $\delta K$ /kHz  | -1.84E+00    | -1.85E-03    | -2.71E+00    |
| $\mu_A/D$        | -0.45        | -0.077       | -0.40        |
| $\mu_B/D$        | 0.057        | -0.086       | 0.088        |
| $\mu_C/D$        | 0.73         | 0.84         | 0.73         |
| Rel. E. /cm-1    | 0.0          | 14.5         | 36.0         |
| Experimental     | wwwwu        | wwwwd'       | wwwwd        |
| A /MHz           | 1748.68 (11) | 1683.21 (5)  | 1723.00 (28) |
| B /MHz           | 1139.58 (5)  | 1173.55 (13) | 1158.26 (13) |
| C /MHz           | 715.90 (18)  | 744.33 (4)   | 728.87 (11)  |
| $\mu_A/D$        | y            | y            | y            |
| $\mu_B/D$        | y            | y            | y            |
| $\mu_C/D$        | y            | n            | y            |
| N                | 10           | 8            | 10           |
| Error /kHz       | 28           | 139          | 29           |

SI Table 11. Calculated and fitted constants for the  $(D_2O)_4(CH_3OH)$  isotopologue conformers.

| Ab initio        | wwwwu        | wwwwd'       | wwwwd        |
|------------------|--------------|--------------|--------------|
| A /MHz           | 1945.668     | 1864.589     | 1911.504     |
| B /MHz           | 1113.595     | 1154.347     | 1134.358     |
| C /MHz           | 732.854      | 766.768      | 748.392      |
| $\Delta J$ /kHz  | 1.99E+00     | 1.96E-03     | 2.42E+00     |
| $\Delta K$ /kHz  | 3.72E+00     | 3.59E-03     | 5.14E+00     |
| $\Delta JK$ /kHz | -5.44E+00    | -5.19E-03    | -7.12E+00    |
| $\delta J$ /kHz  | 5.14E-01     | 3.86E-04     | 5.59E-01     |
| $\delta K$ /kHz  | -2.41E+00    | -2.40E-03    | -3.55E+00    |
| $\mu_A/D$        | -0.43        | -0.058       | -0.37        |
| $\mu_B/D$        | 0.017        | -0.052       | 0.13         |
| $\mu_C/D$        | 0.72         | 0.82         | 0.74         |
| Rel. E. /cm-1    | 0.0          | 6.4          | 34.9         |
| Experimental     | wwwwu        | wwwwd'       | wwwwd        |
| A /MHz           | 1945.61 (14) | 1864.60 (18) | 1911.57 (20) |
| B /MHz           | 1113.52 (10) | 1154.07 (6)  | 1134.55 (6)  |
| C /MHz           | 732.66 (8)   | 766.68 (7)   | 747.94 (6)   |
| $\mu_A/D$        | y            | n            | y            |
| $\mu_B/D$        | y            | y            | y            |
| $\mu_C/D$        | y            | y            | y            |
| N                | 4            | 4            | 4            |
| Error /kHz       | 169          | 150          | 89           |

SI Table 12. Calculated and fitted constants for the  $(H_2O)_4(CD_3OD)$  isotopologue conformers.

| Ab initio        | wwwwd        | wwwwd'       | wwwwu     |
|------------------|--------------|--------------|-----------|
| A /MHz           | 1919.109     | 1844.654     | 1948.036  |
| B /MHz           | 1234.117     | 1250.24      | 1214.465  |
| C /MHz           | 785.318      | 798.815      | 770.69    |
| $\Delta J$ /kHz  | 2.61E+00     | 1.94E+00     | 2.02E+00  |
| $\Delta K$ /kHz  | 5.79E+00     | 3.30E+00     | 3.49E+00  |
| $\Delta JK$ /kHz | -7.98E+00    | -4.89E+00    | -5.25E+00 |
| $\delta J$ /kHz  | 4.81E-01     | 3.18E-01     | 4.68E-01  |
| $\delta K$ /kHz  | -4.44E+00    | -2.35E+00    | -2.35E+00 |
| $\mu_A/D$        | -0.36        | -0.058       | -0.43     |
| $\mu_B/D$        | 0.12         | -0.051       | 0.016     |
| $\mu_C/D$        | 0.74         | 0.82         | 0.72      |
| Rel. E. /cm-1    | 0.0          | 30.7         | 36.7      |
| Experimental     | wwwwd        | wwwwd'       | wwwwu     |
| A /MHz           | 1919.04 (14) | 1844.41 (11) | -         |
| B /MHz           | 1233.98 (5)  | 1250.22 (14) | -         |
| C /MHz           | 784.90 (4)   | 798.88 (4)   | -         |
| $\mu_A/D$        | n            | y            | -         |
| $\mu_B/D$        | y            | y            | -         |
| $\mu_C/D$        | n            | y            | -         |
| N                | 4            | 11           | -         |
| Error /kHz       | 971          | 87           | -         |

SI Table 13. Calculated and fitted constants for the (HDO)(H<sub>2</sub>O)<sub>3</sub>(CH<sub>3</sub>OH) isotopologue conformers.

| Ab initio        | wwwwu        | wwwwd'      | wwwwd        |
|------------------|--------------|-------------|--------------|
| A /MHz           | 1974.882     | 1875.205    | 1945.393     |
| B /MHz           | 1199.241     | 1229.914    | 1218.721     |
| C /MHz           | 768.668      | 794.843     | 783.37       |
| $\Delta J$ /kHz  | 2.05E+00     | 1.96E+00    | 2.42E+00     |
| $\Delta K$ /kHz  | 3.57E+00     | 3.25E+00    | 4.79E+00     |
| $\Delta JK$ /kHz | -5.36E+00    | -4.86E+00   | -6.79E+00    |
| $\delta J$ /kHz  | 4.95E-01     | 3.39E-01    | 5.14E-01     |
| $\delta K$ /kHz  | -2.35E+00    | -2.19E+00   | -3.40E+00    |
| $\mu_A/D$        | -0.43        | -0.057      | -0.37        |
| $\mu_B/D$        | 0.013        | -0.047      | 0.13         |
| $\mu_C/D$        | 0.72         | 0.82        | 0.74         |
| Rel. E. /cm-1    | 0.0          | 32.3        | 35.6         |
| Experimental     | wwwwu        | wwwwd'      | wwwwd        |
| A /MHz           | 1975.78 (9)  | 1875.16 (6) | 1945.36 (29) |
| B /MHz           | 1199.11 (22) | 1229.78 (8) | 1218.32 (28) |
| C /MHz           | 768.27 (3)   | 794.79 (8)  | 783.16 (9)   |
| $\mu_A/D$        | y            | n           | y            |
| $\mu_B/D$        | y            | y           | y            |
| $\mu_C/D$        | n            | y           | n            |
| N                | 5            | 5           | 4            |
| Error /kHz       | 42           | 245         | 617          |

SI Table 14. Calculated and fitted constants for the (H<sub>2</sub>O)(HDO)(H<sub>2</sub>O)<sub>2</sub>(CH<sub>3</sub>OH) isotopologue conformers.



## Section 2: Kraitchman Substitution Results and Calculated O-O Distances

The KRA fitting program was used to empirically find the position of a single hydrogen for comparison to calculation. The hydrogen used for comparison is the hydrogen participating in hydrogen bonding attached to the first water in the ring based on the naming scheme. The agreement between the fit and the calculated coordinates suggests the calculated O-O positions, and therefore separation, would be in good agreement with experiment. Kraitchman analysis was only performed on conformers in which both the normal isotopologues and HDO isotopologues had error within experimental expectation.

**SI Table 15. Calculated H position vs Kraitchman fit of H position. \* indicates high error due to close proximity of atom to the principal axis, so the value is not reported.**

| Conformer    | Kra. X | Kra. Y | Kra. Z | D to CoM | Calc. X | Calc. Y | Calc. Z | D to CoM | Difference (Å) | % error |
|--------------|--------|--------|--------|----------|---------|---------|---------|----------|----------------|---------|
| <b>wduud</b> | 0.8619 | 1.8690 | 0.8774 | 2.2374   | 0.8528  | -1.9659 | 0.6852  | 2.2498   | 0.0124         | 0.6     |
| <b>wduuu</b> | 0.7146 | 2.1355 | *      | 2.2519   | 0.5662  | -2.1407 | -0.2979 | 2.2342   | 0.0177         | 0.8     |
| <b>wuwud</b> | 1.4375 | 1.5857 | 0.1335 | 2.1445   | 1.3729  | -1.5371 | 0.3121  | 2.0844   | 0.0600         | 2.8     |
| <b>wwdud</b> | *      | 2.2889 | 0.8818 | 2.4529   | -0.4493 | 2.4320  | -0.5018 | 2.5236   | 0.0707         | 2.9     |
| <b>wwdwd</b> | 0.5933 | 2.2074 | *      | 2.2857   | -0.3931 | 2.1793  | -0.0821 | 2.2160   | 0.0698         | 3.1     |
| <b>wwwuu</b> | 2.4234 | 0.4876 | *      | 2.4719   | 2.3741  | -0.5065 | 0.1277  | 2.4309   | 0.0411         | 1.7     |

**SI Tables 16-21. Calculated O-O distances for each pentamer and one table showing the average O-O distance trending upward with the addition of water. Distances are in units of Angstroms.**

| 0W:5M          | uduud        |
|----------------|--------------|
| <b>Average</b> | <b>2.713</b> |
|                | 2.707        |
|                | 2.710        |
|                | 2.728        |
|                | 2.710        |
|                | 2.708        |

| 1W:4M          | wduud        | wduuu        | wdudu        | wudud        | wuudu        |
|----------------|--------------|--------------|--------------|--------------|--------------|
| <b>Average</b> | <b>2.715</b> | <b>2.714</b> | <b>2.714</b> | <b>2.715</b> | <b>2.715</b> |
|                | 2.697        | 2.698        | 2.699        | 2.716        | 2.701        |
|                | 2.709        | 2.706        | 2.707        | 2.709        | 2.726        |
|                | 2.725        | 2.711        | 2.708        | 2.709        | 2.710        |
|                | 2.715        | 2.726        | 2.712        | 2.709        | 2.711        |
|                | 2.728        | 2.731        | 2.742        | 2.730        | 2.729        |

| 2W:3M          | wwdud        | wuwud        | wwduu        | wwudu        | wuwdu        | wuwuu        | wwuud        |
|----------------|--------------|--------------|--------------|--------------|--------------|--------------|--------------|
| <b>Average</b> | <b>2.717</b> | <b>2.717</b> | <b>2.717</b> | <b>2.716</b> | <b>2.716</b> | <b>2.717</b> | <b>2.718</b> |
|                | 2.736        | 2.717        | 2.719        | 2.720        | 2.702        | 2.701        | 2.719        |
|                | 2.698        | 2.729        | 2.696        | 2.697        | 2.741        | 2.727        | 2.699        |
|                | 2.707        | 2.699        | 2.710        | 2.707        | 2.699        | 2.701        | 2.728        |
|                | 2.710        | 2.708        | 2.727        | 2.713        | 2.709        | 2.726        | 2.713        |
|                | 2.732        | 2.731        | 2.735        | 2.745        | 2.729        | 2.732        | 2.731        |

| <b>3W:2M</b>   | <b>wwdwd</b> | <b>wwwud</b> | <b>wwwdu</b> | <b>wwuwd</b> | <b>wwwdd</b> | <b>wwuwu</b> | <b>wwdww</b> |
|----------------|--------------|--------------|--------------|--------------|--------------|--------------|--------------|
| <b>Average</b> | <b>2.719</b> | <b>2.720</b> | <b>2.719</b> | <b>2.719</b> | <b>2.720</b> | <b>2.720</b> | <b>2.720</b> |
|                | 2.721        | 2.723        | 2.724        | 2.720        | 2.722        | 2.722        | 2.720        |
|                | 2.699        | 2.734        | 2.717        | 2.701        | 2.717        | 2.716        | 2.698        |
|                | 2.728        | 2.699        | 2.696        | 2.742        | 2.699        | 2.730        | 2.730        |
|                | 2.703        | 2.710        | 2.712        | 2.702        | 2.726        | 2.701        | 2.717        |
|                | 2.744        | 2.732        | 2.746        | 2.730        | 2.736        | 2.729        | 2.733        |

| <b>4W:1M</b>   | <b>wwwwwu</b> | <b>wwwwwd</b> |
|----------------|---------------|---------------|
| <b>Average</b> | <b>2.723</b>  | <b>2.722</b>  |
|                | 2.723         | 2.725         |
|                | 2.720         | 2.721         |
|                | 2.720         | 2.718         |
|                | 2.717         | 2.702         |
|                | 2.734         | 2.745         |

| <b>Water per Cluster</b> | <b>Average O-O distance</b> |
|--------------------------|-----------------------------|
| 0                        | 2.713                       |
| 1                        | 2.715                       |
| 2                        | 2.717                       |
| 3                        | 2.719                       |
| 4                        | 2.723                       |

### Section 3: Images of Geometry Optimized Conformers

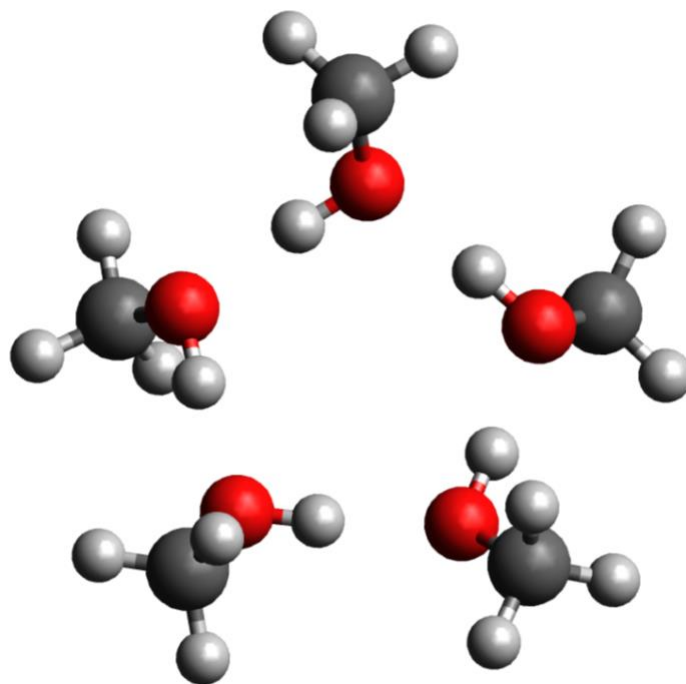

uduud

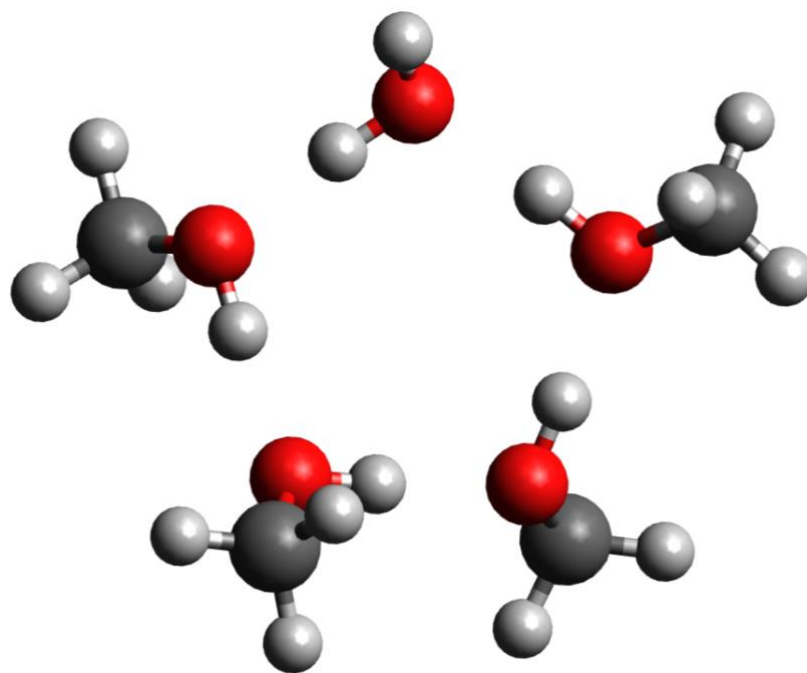

wdudu

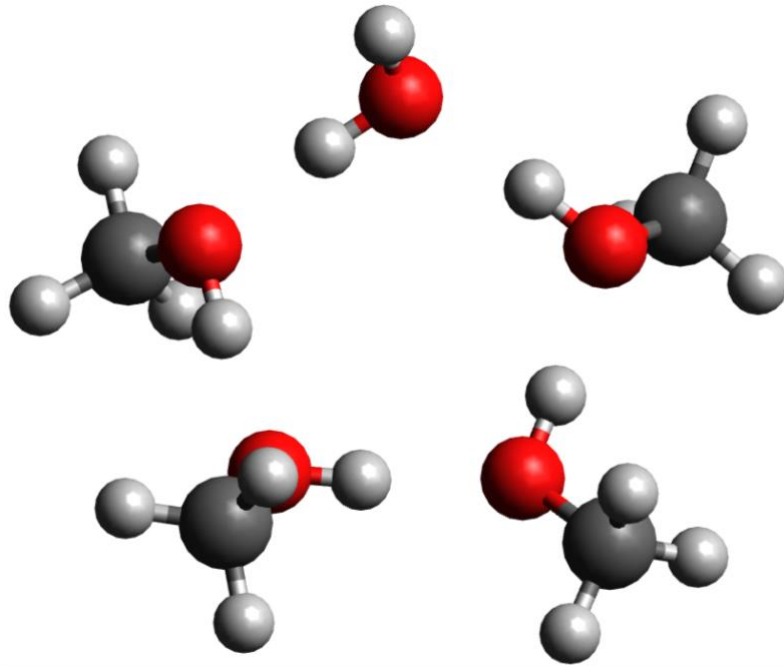

**wduud**

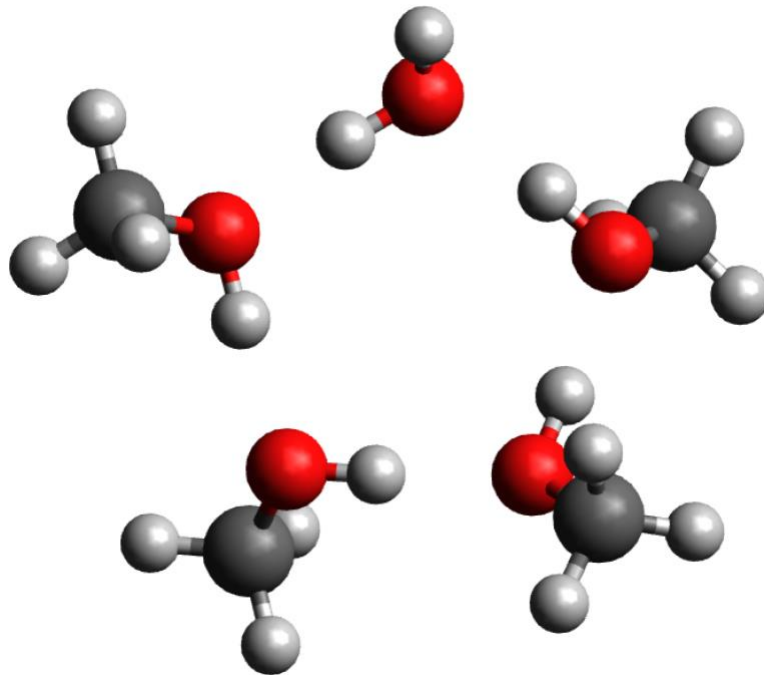

**wudud**

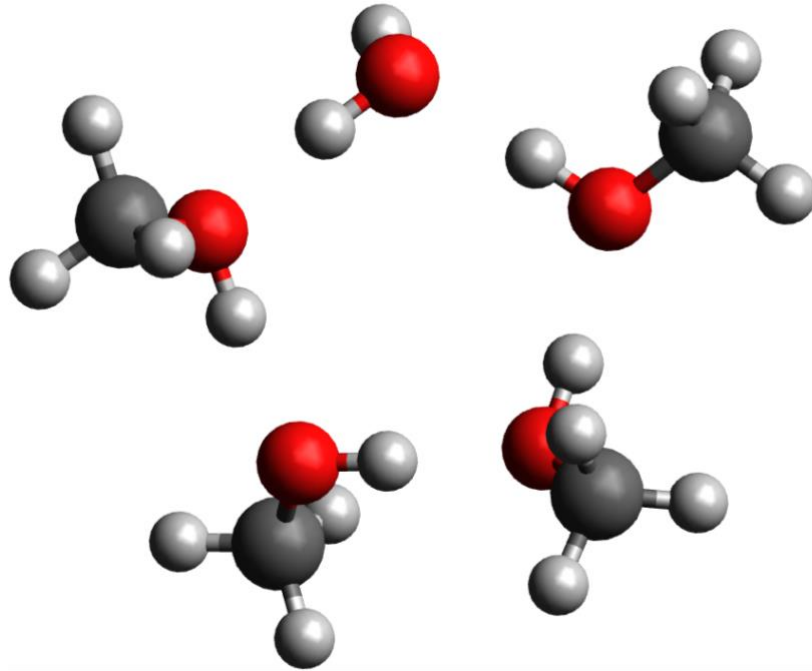

wudu

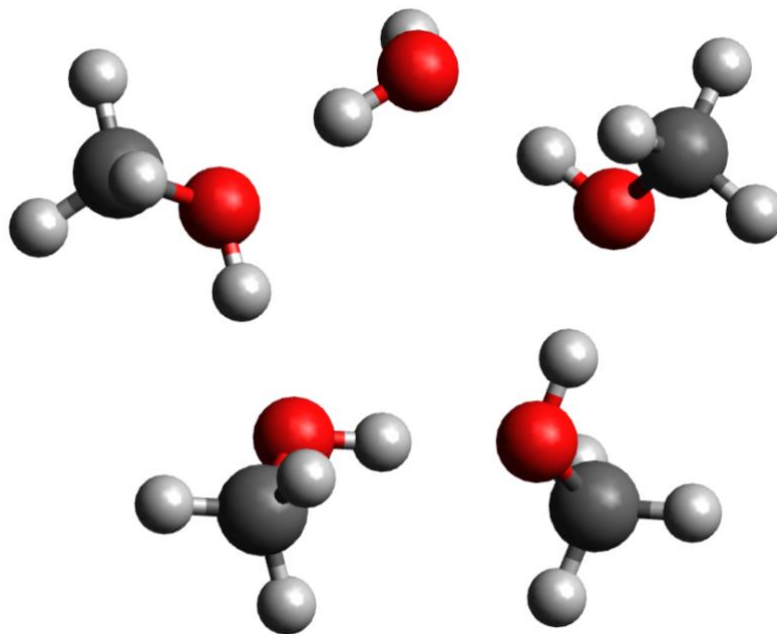

wuudu

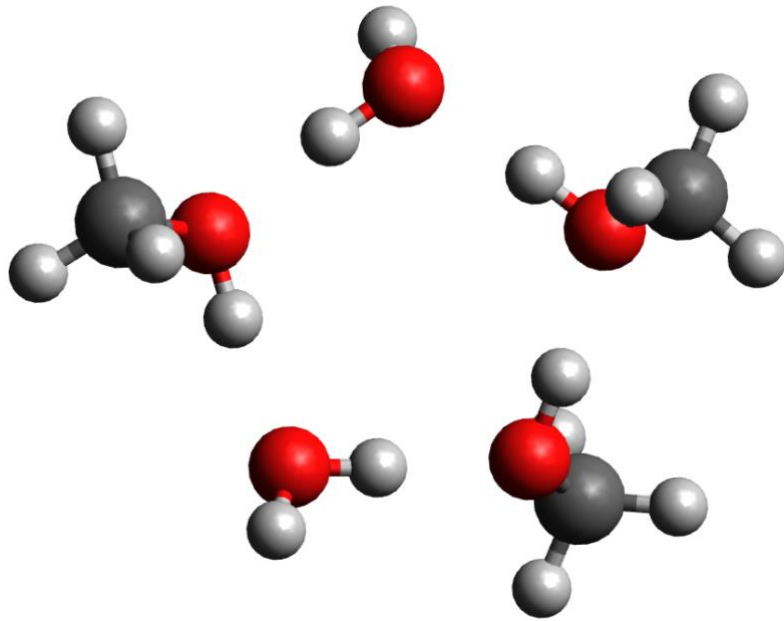

wuwdu

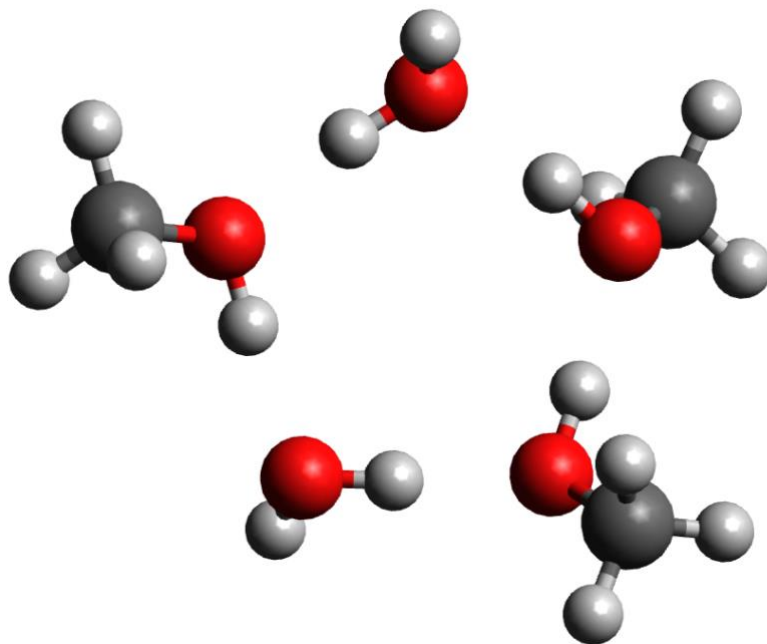

wuwud

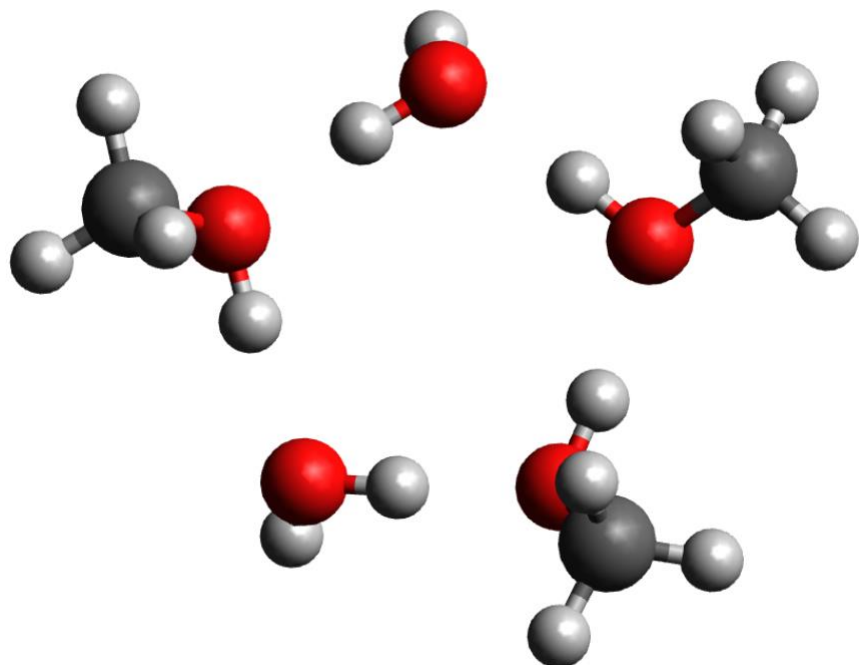

wuwuu

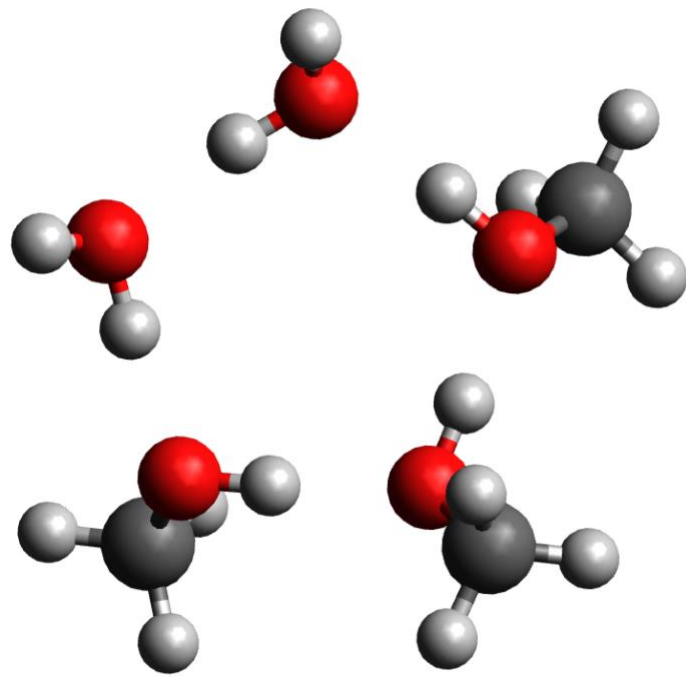

wwdud

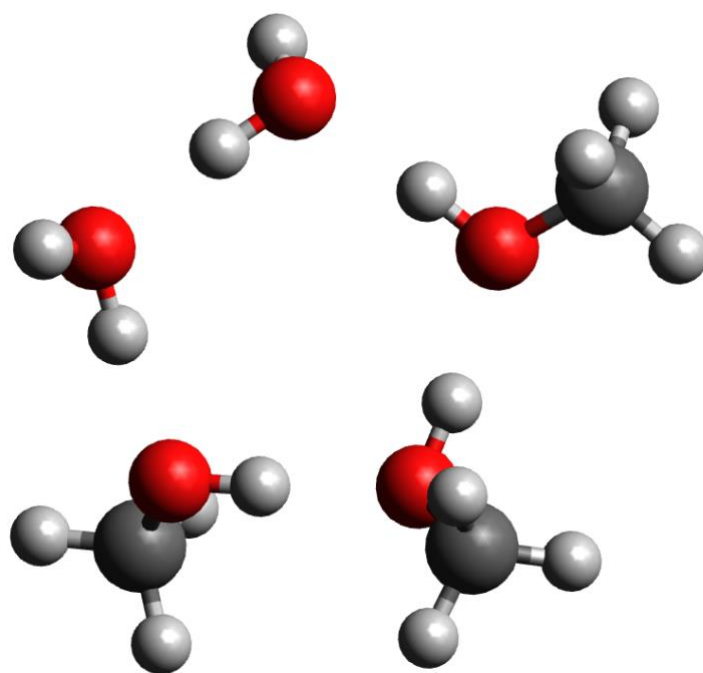

wwduu

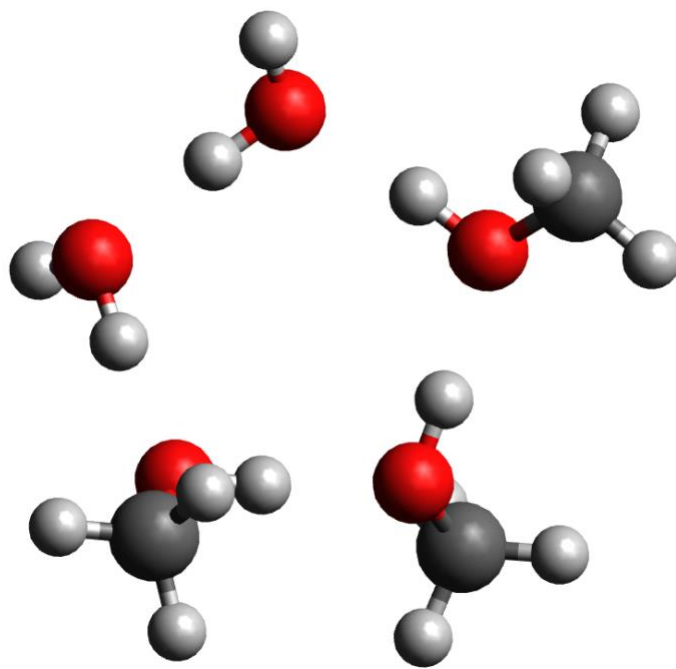

wwudu



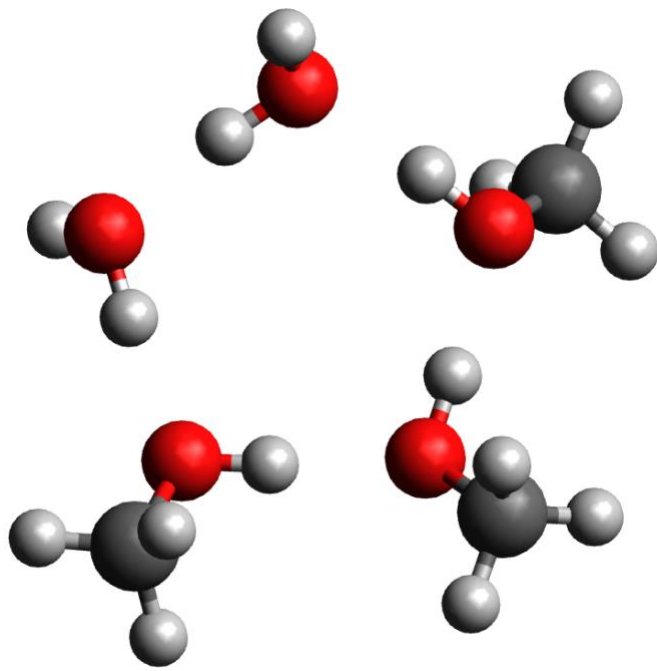

wwuud

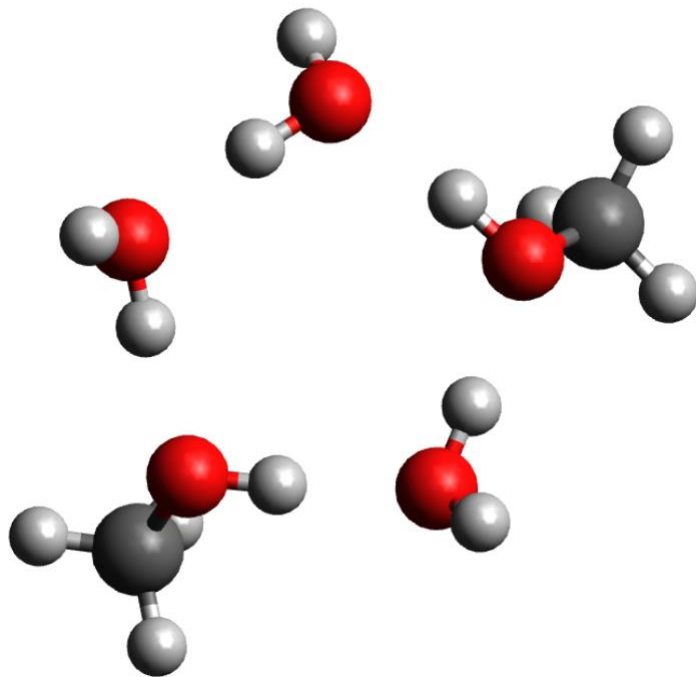

wwdwd

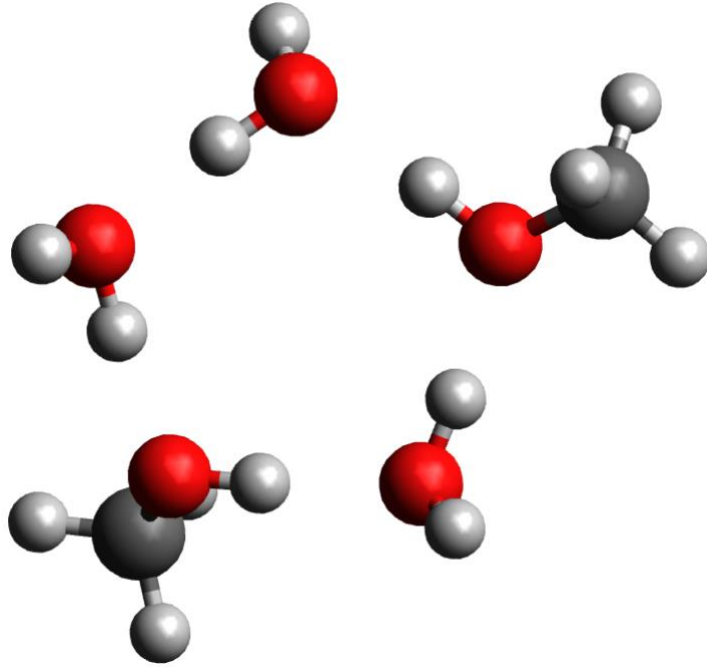

wwdwu

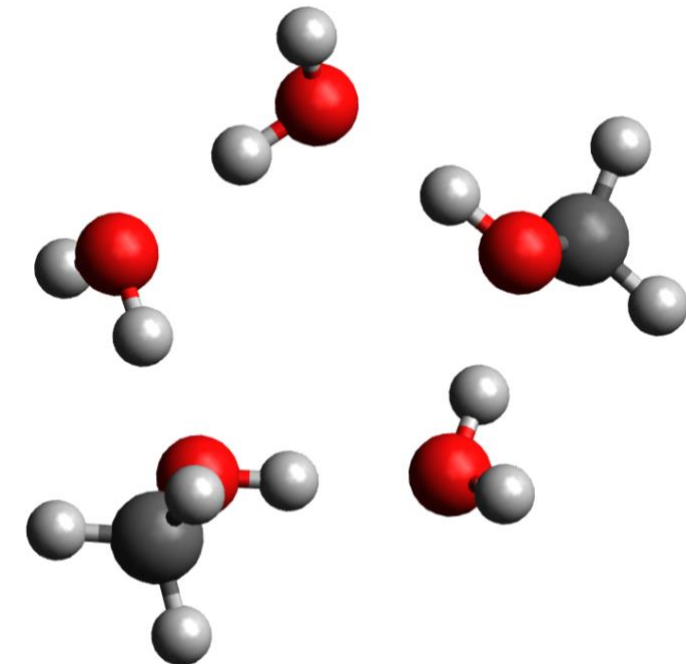

---

wwuwd

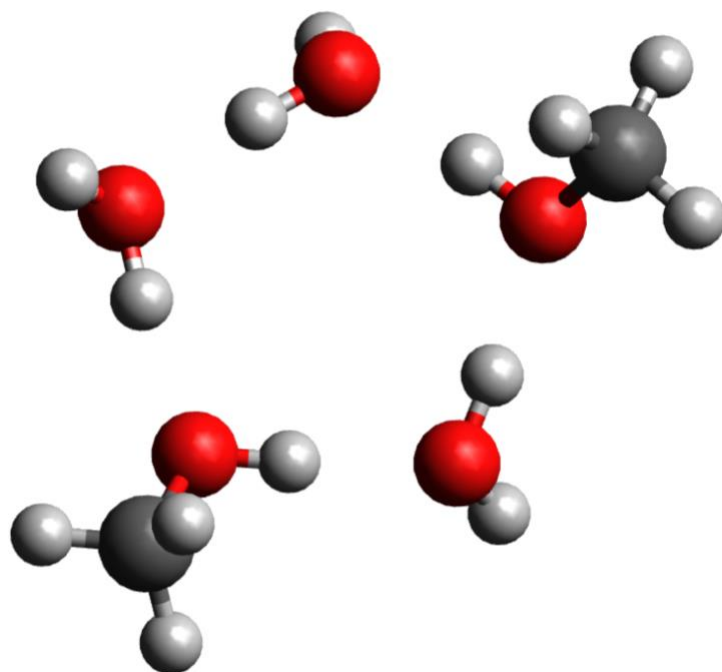

wwuwu

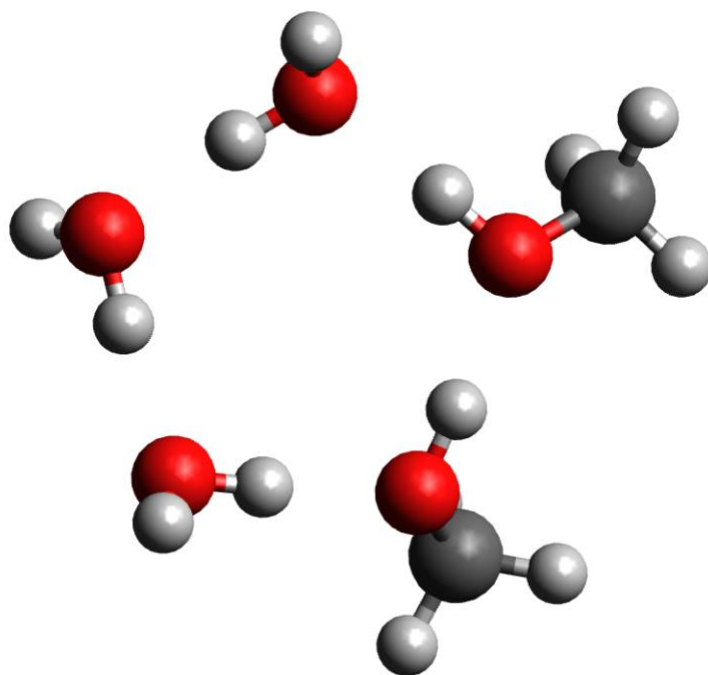

wwwdd

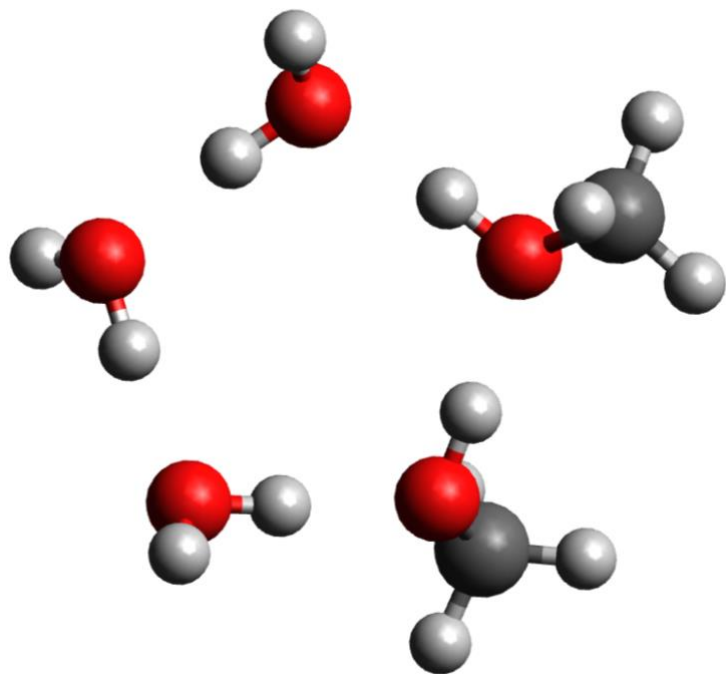

wwwdu

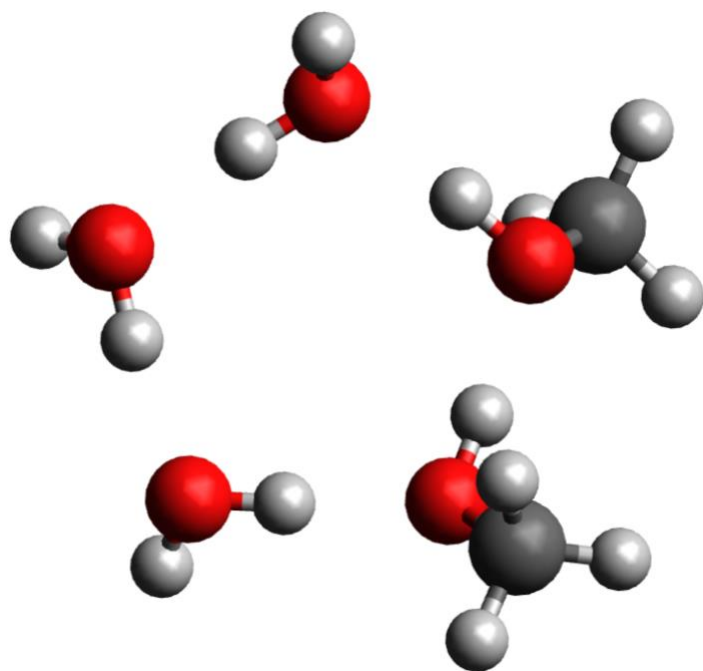

wwwud

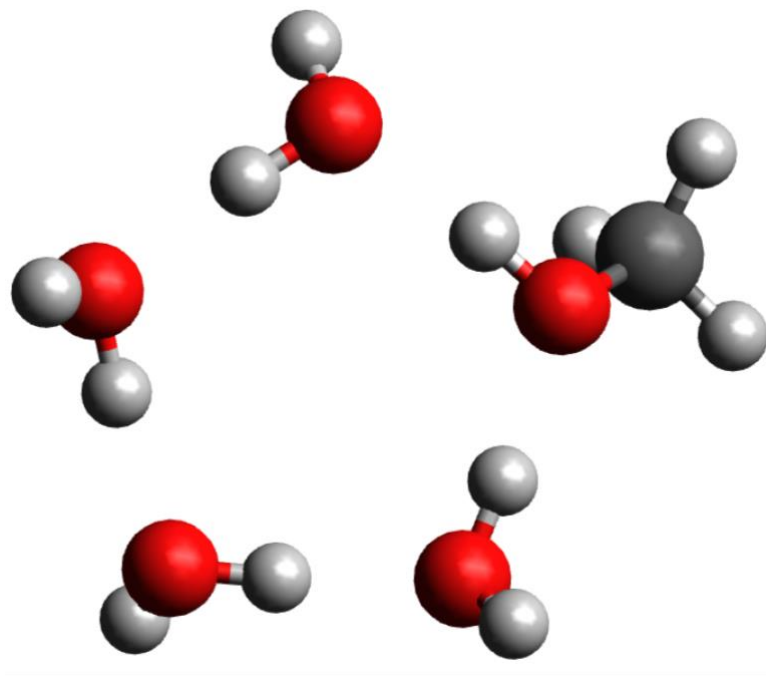

wwwwd

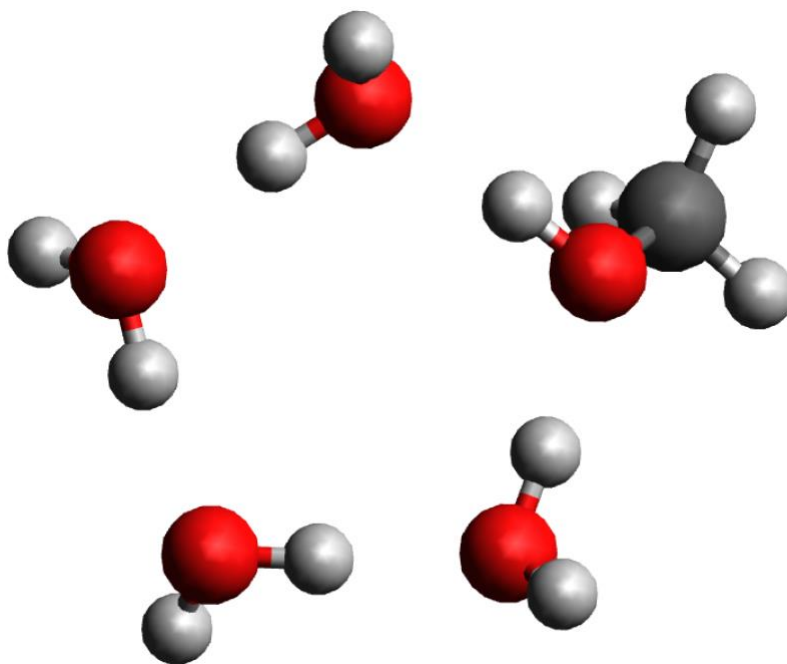

wwwwd'

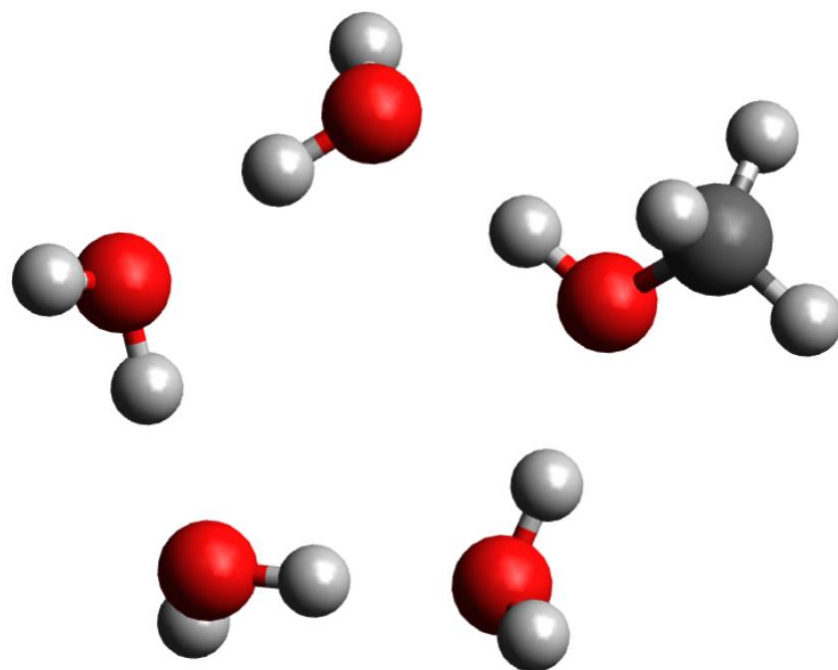

www.wu

#### **Section 4: Final SPFIT Results**

SPFIT output is included for every fitted pentamer conformer. The first 23 fits are normal isotopologues, the next 22 fits are for perdeuterated methanol and normal water clusters, the following 20 fits are perdeuterated water and normal methanol clusters, and the final 18 fits are normal methanol and normal water with a single HDO substitution. HDO1 implies the first water in the naming scheme is replaced with HDO. Likewise, HDO2 conveys the second water in each conformer is replaced with HDO.

### uduud SPFIT Output

EXP.FREQ. - CALC.FREQ. - DIFF. - EXP.ERR.- EST.ERR.-AVG. CALC.FREQ. - DIFF. - WT.

|     |                 |             |             |          |         |         |             |          |        |
|-----|-----------------|-------------|-------------|----------|---------|---------|-------------|----------|--------|
| 1:  | 10 6 4 9 5 4    | 13403.18000 | 13403.05728 | 0.12272  | 0.10000 | 0.09405 | 13403.12372 | 0.05628  | 0.5000 |
| 2:  | 10 7 4 9 6 4    | 13403.18000 | 13403.19016 | -0.01016 | 0.10000 | 0.09405 | 13403.12372 | 0.05628  | 0.5000 |
| 3:  | 12 5 7 11 5 6   | 12580.57000 | 12580.55470 | 0.01530  | 0.10000 | 0.08154 | 12580.55466 | 0.01534  | 0.5000 |
| 4:  | 12 6 7 11 6 6   | 12580.57000 | 12580.55462 | 0.01538  | 0.10000 | 0.08154 | 12580.55466 | 0.01534  | 0.5000 |
| 5:  | 12 9 3 11 9 2   | 14836.27000 | 14836.35317 | -0.08317 | 0.10000 | 0.08451 |             |          |        |
| 6:  | 12 12 1 11 11 1 | 16164.42000 | 16164.40859 | 0.01141  | 0.10000 | 0.05571 |             |          |        |
| 7:  | 13 9 4 12 8 4   | 17419.53000 | 17419.65378 | -0.12378 | 0.10000 | 0.07552 |             |          |        |
| 8:  | 13 13 1 12 12 1 | 17513.34000 | 17513.25312 | 0.08688  | 0.10000 | 0.07255 |             |          |        |
| 9:  | 14 3 11 13 3 10 | 13104.22000 | 13104.23727 | -0.01727 | 0.10000 | 0.07190 | 13104.23727 | -0.01727 | 0.5000 |
| 10: | 14 4 11 13 4 10 | 13104.22000 | 13104.23727 | -0.01727 | 0.10000 | 0.07190 | 13104.23727 | -0.01727 | 0.5000 |
| 11: | 14 10 5 13 10 4 | 16344.68000 | 16344.62286 | 0.05714  | 0.10000 | 0.09066 |             |          |        |
| 12: | 19 0 19 18 0 18 | 15492.08000 | 15492.07813 | 0.00187  | 0.10000 | 0.09952 | 15492.07813 | 0.00187  | 0.4000 |
| 13: | 19 0 19 18 1 18 | 15492.08000 | 15492.07813 | 0.00187  | 0.10000 | 0.09952 | 15492.07813 | 0.00187  | 0.2000 |
| 14: | 19 1 19 18 0 18 | 15492.08000 | 15492.07813 | 0.00187  | 0.10000 | 0.09952 | 15492.07813 | 0.00187  | 0.2000 |
| 15: | 19 1 19 18 1 18 | 15492.08000 | 15492.07813 | 0.00187  | 0.10000 | 0.09952 | 15492.07813 | 0.00187  | 0.2000 |

NORMALIZED DIAGONAL:

|   |              |   |              |   |              |   |              |   |              |   |              |
|---|--------------|---|--------------|---|--------------|---|--------------|---|--------------|---|--------------|
| 1 | 1.00000E+000 | 2 | 8.86697E-001 | 3 | 4.07596E-001 | 4 | 9.74177E-002 | 5 | 9.99359E-001 | 6 | 1.31981E-002 |
| 7 | 1.00000E+000 | 8 | 1.00000E+000 |   |              |   |              |   |              |   |              |

MARQUARDT PARAMETER = 0, TRUST EXPANSION = 1.00

NEW PARAMETER (EST. ERROR) -- CHANGE THIS ITERATION

|   |       |          |                      |                  |
|---|-------|----------|----------------------|------------------|
| 1 | 10000 | A        | 675.5123(108)        | 0.0000           |
| 2 | 20000 | B        | 665.2199(106)        | -0.0000          |
| 3 | 30000 | C        | 400.325( 40)         | -0.0000          |
| 4 | 200   | -DeltaJ  | -0.282( 34)E-03      | -0.000E-03       |
| 5 | 2000  | -DeltaK  | -1.538(209)E-03      | -0.000E-03       |
| 6 | 1100  | -DeltaJK | 2.141(274)E-03       | 0.000E-03        |
| 7 | 40100 | -deltaJ  | 0.022800000( 0)E-03  | -0.000000000E-03 |
| 8 | 41000 | -deltaK  | -0.487000000( 0)E-03 | 0.000000000E-03  |

MICROWAVE AVG = 0.000524 MHz, IR AVG = 0.00000

MICROWAVE RMS = 0.064020 MHz, IR RMS = 0.00000



### wdud SPFIT Output

EXP.FREQ. - CALC.FREQ. - DIFF. - EXP.ERR.- EST.ERR.-AVG. CALC.FREQ. - DIFF. - WT.

|                     |             |             |          |         |         |             |          |        |  |
|---------------------|-------------|-------------|----------|---------|---------|-------------|----------|--------|--|
| 1: 7 7 0 6 6 1      | 12238.79000 | 12238.79217 | -0.00217 | 0.10000 | 0.09896 |             |          |        |  |
| 2: 8 4 5 7 3 5      | 12749.02000 | 12748.95153 | 0.06847  | 0.10000 | 0.07467 |             |          |        |  |
| 3: 9 3 6 8 4 5      | 10480.21000 | 10480.32679 | -0.11679 | 0.10000 | 0.06424 |             |          |        |  |
| 4: 10 6 5 9 7 2     | 13712.52000 | 13712.51300 | 0.00700  | 0.10000 | 0.09874 |             |          |        |  |
| 5: 12 0 12 11 1 11  | 11000.91000 | 11000.85716 | 0.05284  | 0.10000 | 0.06420 | 11000.85716 | 0.05284  | 0.5000 |  |
| 6: 12 1 12 11 0 11  | 11000.91000 | 11000.85716 | 0.05284  | 0.10000 | 0.06420 | 11000.85716 | 0.05284  | 0.5000 |  |
| 7: 16 2 14 15 2 13  | 15988.04000 | 15988.05159 | -0.01159 | 0.10000 | 0.09768 | 15988.05159 | -0.01159 | 0.2500 |  |
| 8: 16 2 14 15 3 13  | 15988.04000 | 15988.05159 | -0.01158 | 0.10000 | 0.09768 | 15988.05159 | -0.01159 | 0.2500 |  |
| 9: 16 3 14 15 2 13  | 15988.04000 | 15988.05159 | -0.01159 | 0.10000 | 0.09768 | 15988.05159 | -0.01159 | 0.2500 |  |
| 10: 16 3 14 15 3 13 | 15988.04000 | 15988.05158 | -0.01158 | 0.10000 | 0.09768 | 15988.05159 | -0.01159 | 0.2500 |  |
| 11: 22 5 17 22 4 18 | 12445.56000 | 12445.62889 | -0.06889 | 0.10000 | 0.06525 |             |          |        |  |
| 12: 22 6 16 22 5 17 | 11675.03000 | 11675.05955 | -0.02955 | 0.10000 | 0.05488 | 11675.05962 | -0.02962 | 0.5000 |  |
| 13: 22 7 16 22 6 17 | 11675.03000 | 11675.05969 | -0.02969 | 0.10000 | 0.05488 | 11675.05962 | -0.02962 | 0.5000 |  |
| 14: 23 8 15 23 7 16 | 10825.16000 | 10825.01515 | 0.14485  | 0.10000 | 0.06218 | 10825.02411 | 0.13589  | 0.5000 |  |
| 15: 23 9 15 23 8 16 | 10825.16000 | 10825.03307 | 0.12693  | 0.10000 | 0.06218 | 10825.02411 | 0.13589  | 0.5000 |  |
| 16: 26 8 18 26 7 19 | 13017.39000 | 13017.47695 | -0.08695 | 0.10000 | 0.08022 | 13017.47701 | -0.08701 | 0.5000 |  |
| 17: 26 9 18 26 8 19 | 13017.39000 | 13017.47708 | -0.08708 | 0.10000 | 0.08022 | 13017.47701 | -0.08701 | 0.5000 |  |
| 18: 28 5 23 28 4 24 | 16778.15000 | 16778.10535 | 0.04465  | 0.10000 | 0.09758 | 16778.10535 | 0.04465  | 0.5000 |  |
| 19: 28 6 23 28 5 24 | 16778.15000 | 16778.10535 | 0.04465  | 0.10000 | 0.09758 | 16778.10535 | 0.04465  | 0.5000 |  |

NORMALIZED DIAGONAL:

|   |              |   |              |   |              |   |              |   |              |   |              |
|---|--------------|---|--------------|---|--------------|---|--------------|---|--------------|---|--------------|
| 1 | 1.00000E+000 | 2 | 6.12524E-001 | 3 | 1.66391E-001 | 4 | 9.53605E-001 | 5 | 2.58456E-001 | 6 | 6.86698E-003 |
| 7 | 9.60321E-001 | 8 | 9.84001E-001 |   |              |   |              |   |              |   |              |

MARQUARDT PARAMETER = 0, TRUST EXPANSION = 1.00

NEW PARAMETER (EST. ERROR) -- CHANGE THIS ITERATION

|   |       |          |                   |              |
|---|-------|----------|-------------------|--------------|
| 1 | 10000 | A        | 893.4325( 75)     | -0.0000      |
| 2 | 20000 | B        | 731.0180( 93)     | 0.0000       |
| 3 | 30000 | C        | 443.4066( 64)     | -0.0000      |
| 4 | 200   | -DeltaJ  | -0.749( 43)E-03   | -0.000E-03   |
| 5 | 2000  | -DeltaK  | -1.735(207)E-03   | -0.000E-03   |
| 6 | 1100  | -DeltaJK | 2.345(247)E-03    | 0.000E-03    |
| 7 | 40100 | -deltaJ  | -0.01199(100)E-03 | -0.00000E-03 |
| 8 | 41000 | -deltaK  | -1.14( 38)E-03    | -0.00E-03    |

MICROWAVE AVG = -0.000657 MHz, IR AVG = 0.00000  
MICROWAVE RMS = 0.070687 MHz, IR RMS = 0.00000

### wuduu SPFIT Output

EXP.FREQ. - CALC.FREQ. - DIFF. - EXP.ERR.- EST.ERR.-AVG. CALC.FREQ. - DIFF. - WT.

|                     |             |             |          |         |         |             |          |        |  |
|---------------------|-------------|-------------|----------|---------|---------|-------------|----------|--------|--|
| 1: 7 7 1 6 6 1      | 12525.84000 | 12525.86925 | -0.02925 | 0.10000 | 0.06636 |             |          |        |  |
| 2: 8 3 5 7 2 5      | 12113.02000 | 12113.12046 | -0.10046 | 0.10000 | 0.06016 |             |          |        |  |
| 3: 9 7 3 8 6 3      | 14900.03000 | 14900.01850 | 0.01150  | 0.10000 | 0.05521 |             |          |        |  |
| 4: 10 6 5 9 7 3     | 16730.21000 | 16730.15298 | 0.05702  | 0.10000 | 0.07380 |             |          |        |  |
| 5: 10 10 0 9 8 1    | 12462.51000 | 12462.42598 | 0.08402  | 0.10000 | 0.08250 |             |          |        |  |
| 6: 12 12 0 11 10 1  | 15365.97000 | 15365.98099 | -0.01099 | 0.10000 | 0.08715 |             |          |        |  |
| 7: 15 3 12 14 3 11  | 16044.26000 | 16044.43046 | -0.17046 | 0.10000 | 0.09551 | 16044.29489 | -0.03489 | 0.5000 |  |
| 8: 15 4 12 14 4 11  | 16044.26000 | 16044.15932 | 0.10068  | 0.10000 | 0.09551 | 16044.29489 | -0.03489 | 0.5000 |  |
| 9: 18 0 18 17 0 17  | 16834.46000 | 16834.45159 | 0.00841  | 0.10000 | 0.09975 | 16834.45159 | 0.00841  | 0.5000 |  |
| 10: 18 1 18 17 1 17 | 16834.46000 | 16834.45159 | 0.00841  | 0.10000 | 0.09975 | 16834.45159 | 0.00841  | 0.5000 |  |

NORMALIZED DIAGONAL:

1 1.00000E+000 2 9.99152E-001 3 3.09776E-001 4 5.22737E-002 5 9.96906E-001 6 1.00000E+000

7 1.00000E+000 8 1.00000E+000

MARQUARDT PARAMETER = 0, TRUST EXPANSION = 1.00

NEW PARAMETER (EST. ERROR) -- CHANGE THIS ITERATION

|   |       |          |                      |                  |
|---|-------|----------|----------------------|------------------|
| 1 | 10000 | A        | 917.9111( 94)        | -0.0000          |
| 2 | 20000 | B        | 688.9699(135)        | -0.0000          |
| 3 | 30000 | C        | 458.761( 32)         | -0.0000          |
| 4 | 200   | -DeltaJ  | -0.439( 67)E-03      | 0.000E-03        |
| 5 | 2000  | -DeltaK  | -0.3058(252)E-03     | -0.0000E-03      |
| 6 | 1100  | -DeltaJK | 0.483000000( 0)E-03  | -0.000000000E-03 |
| 7 | 40100 | -deltaJ  | -0.022000000( 0)E-03 | 0.000000000E-03  |
| 8 | 41000 | -deltaK  | -0.156000000( 0)E-03 | 0.000000000E-03  |

MICROWAVE AVG = -0.001831 MHz, IR AVG = 0.00000

MICROWAVE RMS = 0.053385 MHz, IR RMS = 0.00000

### wdudu SPFIT Output

EXP.FREQ. - CALC.FREQ. - DIFF. - EXP.ERR.- EST.ERR.-AVG. CALC.FREQ. - DIFF. - WT.

|                     |             |             |          |         |         |             |         |        |  |
|---------------------|-------------|-------------|----------|---------|---------|-------------|---------|--------|--|
| 1: 6 6 1 5 5 1      | 10585.02000 | 10585.02975 | -0.00975 | 0.10000 | 0.09978 |             |         |        |  |
| 2: 7 2 6 6 1 6      | 10818.09000 | 10818.01240 | 0.07760  | 0.10000 | 0.07868 |             |         |        |  |
| 3: 8 5 4 7 4 4      | 12499.04000 | 12499.12926 | -0.08926 | 0.10000 | 0.06626 |             |         |        |  |
| 4: 8 7 1 7 6 1      | 12131.26000 | 12131.20121 | 0.05879  | 0.10000 | 0.07664 |             |         |        |  |
| 5: 11 3 8 10 2 8    | 16862.49000 | 16862.51409 | -0.02409 | 0.10000 | 0.08967 |             |         |        |  |
| 6: 12 12 0 11 10 1  | 15330.50000 | 15330.50041 | -0.00041 | 0.10000 | 0.06565 |             |         |        |  |
| 7: 13 0 13 12 0 12  | 12556.47000 | 12556.45375 | 0.01625  | 0.10000 | 0.09916 | 12556.45373 | 0.01627 | 0.5000 |  |
| 8: 13 1 13 12 1 12  | 12556.47000 | 12556.45371 | 0.01629  | 0.10000 | 0.09916 | 12556.45373 | 0.01627 | 0.5000 |  |
| 9: 13 3 10 12 3 9   | 14407.77000 | 14407.84538 | -0.07538 | 0.10000 | 0.07954 |             |         |        |  |
| 10: 13 13 0 12 11 1 | 16460.40000 | 16460.39270 | 0.00730  | 0.10000 | 0.08348 |             |         |        |  |
| 11: 14 5 9 13 5 8   | 16746.88000 | 16746.82983 | 0.05017  | 0.10000 | 0.09006 |             |         |        |  |

NORMALIZED DIAGONAL:

|   |              |   |              |   |              |   |              |   |              |   |              |
|---|--------------|---|--------------|---|--------------|---|--------------|---|--------------|---|--------------|
| 1 | 1.00000E+000 | 2 | 9.93726E-001 | 3 | 1.84773E-001 | 4 | 1.15477E-001 | 5 | 9.85304E-001 | 6 | 4.55094E-002 |
| 7 | 1.00000E+000 | 8 | 7.28180E-001 |   |              |   |              |   |              |   |              |

MARQUARDT PARAMETER = 0, TRUST EXPANSION = 1.00

NEW PARAMETER (EST. ERROR) -- CHANGE THIS ITERATION

|   |       |          |                      |                  |
|---|-------|----------|----------------------|------------------|
| 1 | 10000 | A        | 908.1121( 99)        | 0.0000           |
| 2 | 20000 | B        | 684.6154(120)        | -0.0000          |
| 3 | 30000 | C        | 471.3651(223)        | -0.0000          |
| 4 | 200   | -DeltaJ  | -0.352( 49)E-03      | 0.000E-03        |
| 5 | 2000  | -DeltaK  | -1.855(181)E-03      | 0.000E-03        |
| 6 | 1100  | -DeltaJK | 1.642(196)E-03       | -0.000E-03       |
| 7 | 40100 | -deltaJ  | -0.027900000( 0)E-03 | -0.000000000E-03 |
| 8 | 41000 | -deltaK  | -1.109(275)E-03      | 0.000E-03        |

MICROWAVE AVG = 0.001125 MHz, IR AVG = 0.00000

MICROWAVE RMS = 0.051611 MHz, IR RMS = 0.00000

### wudud SPFIT Output

|    | EXP.FREQ. | -  | CALC.FREQ. | -  | DIFF. | -  | EXP.ERR.    | -           | EST.ERR. | -       | AVG.    | CALC.FREQ.  | -       | DIFF.  | - | WT. |
|----|-----------|----|------------|----|-------|----|-------------|-------------|----------|---------|---------|-------------|---------|--------|---|-----|
| 1: | 7         | 2  | 6          | 6  | 1     | 6  | 10818.09000 | 10818.20423 | -0.11423 | 0.10000 | 0.07401 |             |         |        |   |     |
| 2: | 8         | 3  | 6          | 7  | 2     | 6  | 12301.67000 | 12301.54523 | 0.12477  | 0.10000 | 0.06786 |             |         |        |   |     |
| 3: | 9         | 7  | 2          | 8  | 8     | 0  | 16142.68000 | 16142.67572 | 0.00428  | 0.10000 | 0.07070 |             |         |        |   |     |
| 4: | 9         | 8  | 1          | 8  | 6     | 2  | 11359.56000 | 11359.55860 | 0.00140  | 0.10000 | 0.09999 |             |         |        |   |     |
| 5: | 9         | 9  | 1          | 8  | 8     | 1  | 16142.68000 | 16142.68765 | -0.00765 | 0.10000 | 0.07070 |             |         |        |   |     |
| 6: | 11        | 11 | 0          | 10 | 10    | 0  | 16132.68000 | 16132.69504 | -0.01504 | 0.10000 | 0.09961 |             |         |        |   |     |
| 7: | 13        | 0  | 13         | 12 | 0     | 12 | 12438.22000 | 12438.21933 | 0.00067  | 0.10000 | 0.10000 | 12438.21931 | 0.00069 | 0.5000 |   |     |
| 8: | 13        | 1  | 13         | 12 | 1     | 12 | 12438.22000 | 12438.21928 | 0.00072  | 0.10000 | 0.10000 | 12438.21931 | 0.00069 | 0.5000 |   |     |
| 9: | 14        | 3  | 11         | 13 | 3     | 10 | 15247.08000 | 15247.08173 | -0.00173 | 0.10000 | 0.09999 |             |         |        |   |     |

NORMALIZED DIAGONAL:

|   |              |   |              |   |              |   |              |   |              |   |              |
|---|--------------|---|--------------|---|--------------|---|--------------|---|--------------|---|--------------|
| 1 | 1.00000E+000 | 2 | 9.64929E-001 | 3 | 1.74687E-001 | 4 | 2.85167E-001 | 5 | 9.98101E-001 | 6 | 9.22865E-002 |
| 7 | 1.00000E+000 | 8 | 1.00000E+000 |   |              |   |              |   |              |   |              |

MARQUARDT PARAMETER = 0, TRUST EXPANSION = 1.00

NEW PARAMETER (EST. ERROR) -- CHANGE THIS ITERATION

|   |       |          |                      |                  |
|---|-------|----------|----------------------|------------------|
| 1 | 10000 | A        | 914.8522( 67)        | -0.0000          |
| 2 | 20000 | B        | 681.3245( 74)        | 0.0000           |
| 3 | 30000 | C        | 466.6182(203)        | 0.0000           |
| 4 | 200   | -DeltaJ  | -0.428( 38)E-03      | -0.000E-03       |
| 5 | 2000  | -DeltaK  | -0.905( 68)E-03      | -0.000E-03       |
| 6 | 1100  | -DeltaJK | 0.820(100)E-03       | 0.000E-03        |
| 7 | 40100 | -deltaJ  | -0.032300000( 0)E-03 | -0.000000000E-03 |
| 8 | 41000 | -deltaK  | -0.390000000( 0)E-03 | -0.000000000E-03 |

MICROWAVE AVG = -0.000940 MHz, IR AVG = 0.00000

MICROWAVE RMS = 0.060129 MHz, IR RMS = 0.00000

### wuudu SPFIT Output

EXP.FREQ. - CALC.FREQ. - DIFF. - EXP.ERR.- EST.ERR.-AVG. CALC.FREQ. - DIFF. - WT.

|                     |             |             |          |         |         |             |         |        |  |
|---------------------|-------------|-------------|----------|---------|---------|-------------|---------|--------|--|
| 1: 7 7 0 6 6 0      | 12421.73000 | 12421.76426 | -0.03426 | 0.10000 | 0.07019 |             |         |        |  |
| 2: 8 1 7 7 0 7      | 12580.57000 | 12580.41534 | 0.15466  | 0.10000 | 0.08455 |             |         |        |  |
| 3: 8 4 5 7 3 5      | 12486.20000 | 12486.36409 | -0.16409 | 0.10000 | 0.05799 |             |         |        |  |
| 4: 10 4 6 9 4 5     | 12379.56000 | 12379.57745 | -0.01745 | 0.10000 | 0.07593 |             |         |        |  |
| 5: 10 5 5 9 8 1     | 15896.65000 | 15896.70653 | -0.05653 | 0.10000 | 0.07077 |             |         |        |  |
| 6: 11 1 10 10 1 9   | 11015.57000 | 11015.43059 | 0.13941  | 0.10000 | 0.08704 | 11015.41755 | 0.15245 | 0.5000 |  |
| 7: 11 2 10 10 2 9   | 11015.57000 | 11015.40452 | 0.16548  | 0.10000 | 0.08704 | 11015.41755 | 0.15245 | 0.5000 |  |
| 8: 11 3 9 10 3 8    | 11686.92000 | 11687.07232 | -0.15232 | 0.10000 | 0.05125 |             |         |        |  |
| 9: 11 4 7 10 4 6    | 13188.17000 | 13187.99004 | 0.17996  | 0.10000 | 0.06502 |             |         |        |  |
| 10: 11 10 1 10 9 1  | 16428.60000 | 16428.47814 | 0.12186  | 0.10000 | 0.07427 |             |         |        |  |
| 11: 11 10 1 10 10 0 | 14258.78000 | 14258.83936 | -0.05936 | 0.10000 | 0.08309 |             |         |        |  |
| 12: 12 4 9 11 4 8   | 13272.75000 | 13272.88444 | -0.13444 | 0.10000 | 0.08327 |             |         |        |  |

NORMALIZED DIAGONAL:

|   |              |   |              |   |              |   |              |   |              |   |              |
|---|--------------|---|--------------|---|--------------|---|--------------|---|--------------|---|--------------|
| 1 | 1.00000E+000 | 2 | 9.30469E-001 | 3 | 2.84088E-001 | 4 | 1.42493E-001 | 5 | 9.74021E-001 | 6 | 1.12697E-001 |
| 7 | 1.00000E+000 | 8 | 1.00000E+000 |   |              |   |              |   |              |   |              |

MARQUARDT PARAMETER = 0, TRUST EXPANSION = 1.00

NEW PARAMETER (EST. ERROR) -- CHANGE THIS ITERATION

|   |       |          |                      |                  |
|---|-------|----------|----------------------|------------------|
| 1 | 10000 | A        | 909.3415( 75)        | -0.0000          |
| 2 | 20000 | B        | 700.4932(110)        | 0.0000           |
| 3 | 30000 | C        | 455.0353(215)        | 0.0000           |
| 4 | 200   | -DeltaJ  | -0.202( 46)E-03      | -0.000E-03       |
| 5 | 2000  | -DeltaK  | -0.464(110)E-03      | 0.000E-03        |
| 6 | 1100  | -DeltaJK | 1.040(118)E-03       | -0.000E-03       |
| 7 | 40100 | -deltaJ  | -0.019800000( 0)E-03 | -0.000000000E-03 |
| 8 | 41000 | -deltaK  | 0.019500000( 0)E-03  | -0.000000000E-03 |

MICROWAVE AVG = -0.000867 MHz, IR AVG = 0.00000

MICROWAVE RMS = 0.124608 MHz, IR RMS = 0.00000

### wuwdu SPFIT Output

EXP.FREQ. - CALC.FREQ. - DIFF. - EXP.ERR.- EST.ERR.-AVG. CALC.FREQ. - DIFF. - WT.

|                     |             |             |          |         |         |             |         |        |  |
|---------------------|-------------|-------------|----------|---------|---------|-------------|---------|--------|--|
| 1: 5 4 2 4 3 2      | 10502.95000 | 10503.13545 | -0.18545 | 0.10000 | 0.05350 |             |         |        |  |
| 2: 6 3 4 5 2 4      | 11228.24000 | 11228.17066 | 0.06934  | 0.10000 | 0.04818 |             |         |        |  |
| 3: 6 4 2 5 3 2      | 11629.69000 | 11629.59694 | 0.09306  | 0.10000 | 0.07912 |             |         |        |  |
| 4: 9 1 8 8 0 8      | 16621.88000 | 16621.88215 | -0.00215 | 0.10000 | 0.09310 |             |         |        |  |
| 5: 12 8 4 12 7 6    | 10480.21000 | 10480.07709 | 0.13291  | 0.10000 | 0.06777 |             |         |        |  |
| 6: 13 7 6 13 8 6    | 11603.10000 | 11603.22191 | -0.12191 | 0.10000 | 0.06804 |             |         |        |  |
| 7: 15 9 7 15 6 9    | 11456.09000 | 11456.05519 | 0.03481  | 0.10000 | 0.05511 |             |         |        |  |
| 8: 17 8 10 17 7 10  | 12499.04000 | 12499.07264 | -0.03264 | 0.10000 | 0.08776 |             |         |        |  |
| 9: 18 7 11 17 4 13  | 16634.19000 | 16634.18956 | 0.00044  | 0.10000 | 0.10000 |             |         |        |  |
| 10: 19 6 14 18 13 6 | 17003.09000 | 17003.09188 | -0.00188 | 0.10000 | 0.09997 |             |         |        |  |
| 11: 19 12 7 19 11 9 | 17155.33000 | 17155.31962 | 0.01038  | 0.10000 | 0.09966 | 17155.31961 | 0.01039 | 0.5000 |  |
| 12: 19 12 8 19 9 10 | 17155.33000 | 17155.31960 | 0.01040  | 0.10000 | 0.09966 | 17155.31961 | 0.01039 | 0.5000 |  |

NORMALIZED DIAGONAL:

|   |              |   |              |   |              |   |              |   |              |   |              |
|---|--------------|---|--------------|---|--------------|---|--------------|---|--------------|---|--------------|
| 1 | 1.00000E+000 | 2 | 6.90079E-001 | 3 | 2.74417E-001 | 4 | 9.98190E-001 | 5 | 1.00000E+000 | 6 | 7.62985E-002 |
| 7 | 2.37008E-001 | 8 | 1.90028E-001 |   |              |   |              |   |              |   |              |

MARQUARDT PARAMETER = 0, TRUST EXPANSION = 1.00

NEW PARAMETER (EST. ERROR) -- CHANGE THIS ITERATION

|   |       |          |                      |                  |
|---|-------|----------|----------------------|------------------|
| 1 | 10000 | A        | 1214.9160( 69)       | 0.0000           |
| 2 | 20000 | B        | 764.9376( 53)        | -0.0000          |
| 3 | 30000 | C        | 521.8436(163)        | 0.0000           |
| 4 | 200   | -DeltaJ  | -0.4775(178)E-03     | 0.0000E-03       |
| 5 | 2000  | -DeltaK  | -0.139000000( 0)E-03 | -0.000000000E-03 |
| 6 | 1100  | -DeltaJK | 0.817( 47)E-03       | -0.000E-03       |
| 7 | 40100 | -deltaJ  | -0.0769( 64)E-03     | 0.0000E-03       |
| 8 | 41000 | -deltaK  | -0.438( 37)E-03      | 0.000E-03        |

MICROWAVE AVG = -0.000280 MHz, IR AVG = 0.00000

MICROWAVE RMS = 0.086749 MHz, IR RMS = 0.00000

### wuuu SPFIT Output

EXP.FREQ. - CALC.FREQ. - DIFF. - EXP.ERR.- EST.ERR.-AVG. CALC.FREQ. - DIFF. - WT.

|                    |             |             |          |         |         |
|--------------------|-------------|-------------|----------|---------|---------|
| 1: 6 3 3 5 4 1     | 12794.97000 | 12794.92116 | 0.04884  | 0.10000 | 0.07813 |
| 2: 6 3 4 5 2 4     | 11300.96000 | 11301.02084 | -0.06084 | 0.10000 | 0.08437 |
| 3: 7 1 6 6 0 6     | 13021.47000 | 13021.44829 | 0.02171  | 0.10000 | 0.09906 |
| 4: 7 7 1 6 6 1     | 16288.97000 | 16288.98790 | -0.01790 | 0.10000 | 0.09645 |
| 5: 8 4 5 7 4 4     | 10749.06000 | 10748.97527 | 0.08473  | 0.10000 | 0.08839 |
| 6: 8 8 0 7 6 1     | 11368.94000 | 11368.90208 | 0.03792  | 0.10000 | 0.09685 |
| 7: 9 7 3 8 5 4     | 12212.46000 | 12212.64305 | -0.18305 | 0.10000 | 0.05635 |
| 8: 10 8 3 9 6 4    | 13586.82000 | 13586.75060 | 0.06940  | 0.10000 | 0.09423 |
| 9: 12 2 10 11 2 9  | 14599.05000 | 14598.96601 | 0.08399  | 0.10000 | 0.07095 |
| 10: 12 3 10 11 3 9 | 14588.44000 | 14588.52253 | -0.08253 | 0.10000 | 0.07083 |

NORMALIZED DIAGONAL:

|   |              |   |              |   |              |   |              |   |              |   |              |
|---|--------------|---|--------------|---|--------------|---|--------------|---|--------------|---|--------------|
| 1 | 1.00000E+000 | 2 | 9.11291E-001 | 3 | 3.82572E-001 | 4 | 8.93125E-002 | 5 | 1.11084E-001 | 6 | 2.90607E-002 |
| 7 | 1.78251E-001 | 8 | 9.97313E-001 |   |              |   |              |   |              |   |              |

MARQUARDT PARAMETER = 0, TRUST EXPANSION = 1.00

NEW PARAMETER (EST. ERROR) -- CHANGE THIS ITERATION

|   |       |          |                 |           |
|---|-------|----------|-----------------|-----------|
| 1 | 10000 | A        | 1201.8005(199)  | 0.0000    |
| 2 | 20000 | B        | 781.4729(215)   | -0.0000   |
| 3 | 30000 | C        | 519.6128(227)   | 0.0000    |
| 4 | 200   | -DeltaJ  | -0.454(130)E-03 | 0.000E-03 |
| 5 | 2000  | -DeltaK  | 3.86( 46)E-03   | 0.00E-03  |
| 6 | 1100  | -DeltaJK | -2.93( 51)E-03  | -0.00E-03 |
| 7 | 40100 | -deltaJ  | -0.079( 91)E-03 | 0.000E-03 |
| 8 | 41000 | -deltaK  | -0.66( 51)E-03  | 0.00E-03  |

MICROWAVE AVG = 0.000228 MHz, IR AVG = 0.00000

MICROWAVE RMS = 0.082271 MHz, IR RMS = 0.00000

### wwdud SPFIT Output

EXP.FREQ. - CALC.FREQ. - DIFF. - EXP.ERR.- EST.ERR.-AVG. CALC.FREQ. - DIFF. - WT.

|                     |             |             |          |         |         |             |          |        |  |
|---------------------|-------------|-------------|----------|---------|---------|-------------|----------|--------|--|
| 1: 6 2 4 5 1 4      | 11205.43000 | 11205.54643 | -0.11643 | 0.10000 | 0.05936 |             |          |        |  |
| 2: 6 4 3 5 3 3      | 11520.72000 | 11520.60723 | 0.11277  | 0.10000 | 0.05814 |             |          |        |  |
| 3: 7 2 6 6 1 6      | 13286.13000 | 13286.11138 | 0.01862  | 0.10000 | 0.09802 |             |          |        |  |
| 4: 7 3 4 6 2 4      | 12883.95000 | 12883.91421 | 0.03579  | 0.10000 | 0.08476 |             |          |        |  |
| 5: 7 5 2 6 4 2      | 13272.75000 | 13272.80765 | -0.05765 | 0.10000 | 0.08900 |             |          |        |  |
| 6: 8 6 2 7 5 2      | 10554.43000 | 10554.42103 | 0.00897  | 0.10000 | 0.09953 |             |          |        |  |
| 7: 10 9 1 9 8 1     | 13403.18000 | 13403.18274 | -0.00274 | 0.10000 | 0.09856 |             |          |        |  |
| 8: 15 0 15 14 0 14  | 17597.44000 | 17597.43999 | 0.00001  | 0.10000 | 0.10000 |             |          |        |  |
| 9: 19 12 7 19 13 7  | 10058.26000 | 10058.25902 | 0.00098  | 0.10000 | 0.09619 |             |          |        |  |
| 10: 20 13 7 20 12 9 | 10737.50000 | 10737.51601 | -0.01601 | 0.10000 | 0.09751 | 10737.50056 | -0.00056 | 0.5000 |  |
| 11: 20 13 8 20 12 8 | 10737.50000 | 10737.48512 | 0.01488  | 0.10000 | 0.09751 | 10737.50056 | -0.00056 | 0.5000 |  |

NORMALIZED DIAGONAL:

|   |              |   |              |   |              |   |              |   |              |   |              |
|---|--------------|---|--------------|---|--------------|---|--------------|---|--------------|---|--------------|
| 1 | 1.00000E+000 | 2 | 5.19641E-001 | 3 | 9.94831E-002 | 4 | 9.99211E-001 | 5 | 1.96533E-002 | 6 | 9.89339E-002 |
| 7 | 1.46993E-001 | 8 | 7.87303E-001 |   |              |   |              |   |              |   |              |

MARQUARDT PARAMETER = 0, TRUST EXPANSION = 1.00

NEW PARAMETER (EST. ERROR) -- CHANGE THIS ITERATION

|   |       |          |                  |             |
|---|-------|----------|------------------|-------------|
| 1 | 10000 | A        | 1079.4438(212)   | -0.0000     |
| 2 | 20000 | B        | 856.7747(116)    | 0.0000      |
| 3 | 30000 | C        | 573.1190(316)    | -0.0000     |
| 4 | 200   | -DeltaJ  | -0.359(112)E-03  | 0.000E-03   |
| 5 | 2000  | -DeltaK  | -3.31( 41)E-03   | -0.00E-03   |
| 6 | 1100  | -DeltaJK | 5.56( 37)E-03    | 0.00E-03    |
| 7 | 40100 | -deltaJ  | -0.3157(261)E-03 | -0.0000E-03 |
| 8 | 41000 | -deltaK  | -3.37( 38)E-03   | -0.00E-03   |

MICROWAVE AVG = -0.000023 MHz, IR AVG = 0.00000

MICROWAVE RMS = 0.055957 MHz, IR RMS = 0.00000



### wwwud SPFIT Output

EXP.FREQ. - CALC.FREQ. - DIFF. - EXP.ERR.- EST.ERR.-AVG. CALC.FREQ. - DIFF. - WT.

|     |                 |             |             |          |         |         |             |         |        |
|-----|-----------------|-------------|-------------|----------|---------|---------|-------------|---------|--------|
| 1:  | 6 2 4 5 1 4     | 11294.94000 | 11295.04441 | -0.10441 | 0.10000 | 0.05330 |             |         |        |
| 2:  | 6 2 5 5 1 5     | 11603.10000 | 11603.25373 | -0.15373 | 0.10000 | 0.05033 |             |         |        |
| 3:  | 6 5 1 5 4 1     | 12457.00000 | 12456.97596 | 0.02404  | 0.10000 | 0.03984 |             |         |        |
| 4:  | 6 5 2 5 4 1     | 12421.73000 | 12421.71387 | 0.01613  | 0.10000 | 0.04199 |             |         |        |
| 5:  | 6 6 1 5 5 1     | 13385.09000 | 13385.04800 | 0.04200  | 0.10000 | 0.04906 |             |         |        |
| 6:  | 8 2 7 7 1 7     | 15492.08000 | 15491.90152 | 0.17848  | 0.10000 | 0.07021 |             |         |        |
| 7:  | 8 4 4 7 5 3     | 16328.56000 | 16328.72300 | -0.16300 | 0.10000 | 0.04917 |             |         |        |
| 8:  | 8 6 3 7 5 3     | 16267.51000 | 16267.41029 | 0.09971  | 0.10000 | 0.04932 |             |         |        |
| 9:  | 8 6 3 7 6 2     | 11586.38000 | 11586.33501 | 0.04499  | 0.10000 | 0.05411 |             |         |        |
| 10: | 9 1 8 8 1 7     | 10821.86000 | 10821.86147 | -0.00147 | 0.10000 | 0.08133 |             |         |        |
| 11: | 9 4 5 8 6 2     | 13812.51000 | 13812.54715 | -0.03715 | 0.10000 | 0.05297 |             |         |        |
| 12: | 10 10 0 9 8 1   | 15111.26000 | 15111.21874 | 0.04126  | 0.10000 | 0.09096 |             |         |        |
| 13: | 12 0 12 11 0 11 | 13087.50000 | 13087.47363 | 0.02637  | 0.10000 | 0.09844 | 13087.47355 | 0.02645 | 0.2500 |
| 14: | 12 0 12 11 1 11 | 13087.50000 | 13087.47343 | 0.02657  | 0.10000 | 0.09844 | 13087.47355 | 0.02645 | 0.2500 |
| 15: | 12 1 12 11 0 11 | 13087.50000 | 13087.47367 | 0.02633  | 0.10000 | 0.09844 | 13087.47355 | 0.02645 | 0.2500 |
| 16: | 12 1 12 11 1 11 | 13087.50000 | 13087.47347 | 0.02653  | 0.10000 | 0.09844 | 13087.47355 | 0.02645 | 0.2500 |
| 17: | 12 9 3 11 9 2   | 17192.21000 | 17192.21326 | -0.00326 | 0.10000 | 0.09825 | 17192.20970 | 0.00030 | 0.5000 |
| 18: | 12 11 2 11 11 1 | 17192.21000 | 17192.20613 | 0.00387  | 0.10000 | 0.09825 | 17192.20970 | 0.00030 | 0.5000 |
| 19: | 13 4 10 12 4 9  | 16834.46000 | 16834.50725 | -0.04725 | 0.10000 | 0.09552 |             |         |        |

NORMALIZED DIAGONAL:

1 1.00000E+000 2 7.19586E-001 3 2.58850E-001 4 9.70619E-001 5 4.35612E-001 6 7.34782E-002  
7 1.00000E+000 8 9.99916E-001

MARQUARDT PARAMETER = 0, TRUST EXPANSION = 1.00

NEW PARAMETER (EST. ERROR) -- CHANGE THIS ITERATION

|   |       |          |                      |                  |
|---|-------|----------|----------------------|------------------|
| 1 | 10000 | A        | 1151.9068( 46)       | 0.0000           |
| 2 | 20000 | B        | 844.5618( 66)        | 0.0000           |
| 3 | 30000 | C        | 526.6232(110)        | 0.0000           |
| 4 | 200   | -DeltaJ  | -0.091( 54)E-03      | -0.000E-03       |
| 5 | 2000  | -DeltaK  | -0.817(114)E-03      | -0.000E-03       |
| 6 | 1100  | -DeltaJK | 1.234(153)E-03       | 0.000E-03        |
| 7 | 40100 | -deltaJ  | -0.043700000( 0)E-03 | -0.000000000E-03 |
| 8 | 41000 | -deltaK  | 0.520( 74)E-03       | 0.000E-03        |

MICROWAVE AVG = -0.002242 MHz, IR AVG = 0.00000

MICROWAVE RMS = 0.087002 MHz, IR RMS = 0.00000

### wuwud SPFIT Output

EXP.FREQ. - CALC.FREQ. - DIFF. - EXP.ERR.- EST.ERR.-AVG. CALC.FREQ. - DIFF. - WT.

|                     |             |             |          |         |         |             |          |        |  |
|---------------------|-------------|-------------|----------|---------|---------|-------------|----------|--------|--|
| 1: 7 2 5 6 1 5      | 12170.29000 | 12170.28634 | 0.00366  | 0.10000 | 0.09241 |             |          |        |  |
| 2: 9 2 8 8 2 7      | 10532.44000 | 10532.40388 | 0.03612  | 0.10000 | 0.07213 |             |          |        |  |
| 3: 11 10 2 10 8 3   | 14537.53000 | 14537.54139 | -0.01139 | 0.10000 | 0.06475 |             |          |        |  |
| 4: 12 0 12 11 0 11  | 12818.62000 | 12818.66602 | -0.04602 | 0.10000 | 0.07321 | 12818.65523 | -0.03523 | 0.2500 |  |
| 5: 12 0 12 11 1 11  | 12818.62000 | 12818.63496 | -0.01496 | 0.10000 | 0.07321 | 12818.65523 | -0.03523 | 0.2500 |  |
| 6: 12 1 12 11 0 11  | 12818.62000 | 12818.67549 | -0.05549 | 0.10000 | 0.07321 | 12818.65523 | -0.03523 | 0.2500 |  |
| 7: 12 1 12 11 1 11  | 12818.62000 | 12818.64444 | -0.02444 | 0.10000 | 0.07321 | 12818.65523 | -0.03523 | 0.2500 |  |
| 8: 13 3 10 12 4 9   | 16201.69000 | 16201.68817 | 0.00183  | 0.10000 | 0.08774 |             |          |        |  |
| 9: 13 6 7 13 7 7    | 10784.31000 | 10784.31126 | -0.00126 | 0.10000 | 0.09970 |             |          |        |  |
| 10: 16 0 16 15 0 15 | 16953.67000 | 16953.65924 | 0.01076  | 0.10000 | 0.09745 | 16953.65915 | 0.01085  | 0.2500 |  |
| 11: 16 0 16 15 1 15 | 16953.67000 | 16953.65899 | 0.01101  | 0.10000 | 0.09745 | 16953.65915 | 0.01085  | 0.2500 |  |
| 12: 16 1 16 15 0 15 | 16953.67000 | 16953.65932 | 0.01068  | 0.10000 | 0.09745 | 16953.65915 | 0.01085  | 0.2500 |  |
| 13: 16 1 16 15 1 15 | 16953.67000 | 16953.65906 | 0.01094  | 0.10000 | 0.09745 | 16953.65915 | 0.01085  | 0.2500 |  |
| 14: 16 13 3 16 12 5 | 16682.13000 | 16682.13261 | -0.00261 | 0.10000 | 0.09919 |             |          |        |  |
| 15: 17 8 10 17 7 10 | 12962.50000 | 12962.49724 | 0.00276  | 0.10000 | 0.09864 |             |          |        |  |

NORMALIZED DIAGONAL:

|   |              |   |              |   |              |   |              |   |              |   |              |
|---|--------------|---|--------------|---|--------------|---|--------------|---|--------------|---|--------------|
| 1 | 1.00000E+000 | 2 | 6.41492E-001 | 3 | 3.80460E-001 | 4 | 1.58626E-001 | 5 | 9.46790E-001 | 6 | 1.00000E+000 |
| 7 | 1.77849E-001 | 8 | 1.00000E+000 |   |              |   |              |   |              |   |              |

MARQUARDT PARAMETER = 0, TRUST EXPANSION = 1.00

NEW PARAMETER (EST. ERROR) -- CHANGE THIS ITERATION

|   |       |          |                     |                  |
|---|-------|----------|---------------------|------------------|
| 1 | 10000 | A        | 1225.0097(141)      | -0.0000          |
| 2 | 20000 | B        | 754.1996( 73)       | -0.0000          |
| 3 | 30000 | C        | 517.0787( 76)       | -0.0000          |
| 4 | 200   | -DeltaJ  | -0.4888(303)E-03    | 0.0000E-03       |
| 5 | 2000  | -DeltaK  | 0.2868(269)E-03     | -0.0000E-03      |
| 6 | 1100  | -DeltaJK | 0.091200000( 0)E-03 | -0.000000000E-03 |
| 7 | 40100 | -deltaJ  | -0.0824(149)E-03    | 0.0000E-03       |
| 8 | 41000 | -deltaK  | -0.3835(261)E-03    | 0.0000E-03       |

MICROWAVE AVG = 0.000526 MHz, IR AVG = 0.00000

MICROWAVE RMS = 0.017718 MHz, IR RMS = 0.00000

### wwduu SPFIT Output

EXP.FREQ. - CALC.FREQ. - DIFF. - EXP.ERR.- EST.ERR.-AVG. CALC.FREQ. - DIFF. - WT.

|                     |             |             |          |         |         |             |          |        |  |
|---------------------|-------------|-------------|----------|---------|---------|-------------|----------|--------|--|
| 1: 6 1 5 5 0 5      | 11456.09000 | 11456.17016 | -0.08016 | 0.10000 | 0.05927 |             |          |        |  |
| 2: 6 2 4 5 1 4      | 11113.73000 | 11113.80763 | -0.07763 | 0.10000 | 0.05929 |             |          |        |  |
| 3: 6 3 4 5 2 4      | 11504.55000 | 11504.39904 | 0.15096  | 0.10000 | 0.05055 |             |          |        |  |
| 4: 8 3 6 7 2 6      | 15247.08000 | 15247.03708 | 0.04292  | 0.10000 | 0.06713 |             |          |        |  |
| 5: 8 5 3 7 4 3      | 17192.21000 | 17192.24174 | -0.03174 | 0.10000 | 0.09839 |             |          |        |  |
| 6: 9 4 5 8 4 4      | 13050.90000 | 13050.85195 | 0.04805  | 0.10000 | 0.07781 |             |          |        |  |
| 7: 9 6 4 8 6 3      | 12931.25000 | 12931.30351 | -0.05351 | 0.10000 | 0.06279 |             |          |        |  |
| 8: 10 0 10 9 0 9    | 11100.96000 | 11100.96408 | -0.00408 | 0.10000 | 0.08901 | 11100.95901 | 0.00099  | 0.2500 |  |
| 9: 10 0 10 9 1 9    | 11100.96000 | 11100.95111 | 0.00889  | 0.10000 | 0.08901 | 11100.95901 | 0.00099  | 0.2500 |  |
| 10: 10 1 10 9 0 9   | 11100.96000 | 11100.96690 | -0.00690 | 0.10000 | 0.08901 | 11100.95901 | 0.00099  | 0.2500 |  |
| 11: 10 1 10 9 1 9   | 11100.96000 | 11100.95393 | 0.00607  | 0.10000 | 0.08901 | 11100.95901 | 0.00099  | 0.2500 |  |
| 12: 10 3 8 9 3 7    | 12831.09000 | 12831.09015 | -0.00015 | 0.10000 | 0.09321 |             |          |        |  |
| 13: 12 0 12 11 0 11 | 13234.95000 | 13234.95088 | -0.00088 | 0.10000 | 0.09810 | 13234.95064 | -0.00064 | 0.2500 |  |
| 14: 12 0 12 11 1 11 | 13234.95000 | 13234.95028 | -0.00028 | 0.10000 | 0.09810 | 13234.95064 | -0.00064 | 0.2500 |  |
| 15: 12 1 12 11 0 11 | 13234.95000 | 13234.95101 | -0.00101 | 0.10000 | 0.09810 | 13234.95064 | -0.00064 | 0.2500 |  |
| 16: 12 1 12 11 1 11 | 13234.95000 | 13234.95041 | -0.00041 | 0.10000 | 0.09810 | 13234.95064 | -0.00064 | 0.2500 |  |

NORMALIZED DIAGONAL:

|   |              |   |              |   |              |   |              |   |              |   |              |
|---|--------------|---|--------------|---|--------------|---|--------------|---|--------------|---|--------------|
| 1 | 1.00000E+000 | 2 | 9.50611E-001 | 3 | 9.99009E-001 | 4 | 1.30775E-001 | 5 | 3.18722E-001 | 6 | 5.92889E-002 |
| 7 | 1.00000E+000 | 8 | 1.00000E+000 |   |              |   |              |   |              |   |              |

MARQUARDT PARAMETER = 0, TRUST EXPANSION = 1.00

NEW PARAMETER (EST. ERROR) -- CHANGE THIS ITERATION

|   |       |          |                      |                  |
|---|-------|----------|----------------------|------------------|
| 1 | 10000 | A        | 1160.2860(101)       | 0.0000           |
| 2 | 20000 | B        | 829.6372( 98)        | 0.0000           |
| 3 | 30000 | C        | 533.4808(175)        | -0.0000          |
| 4 | 200   | -DeltaJ  | -0.330( 79)E-03      | -0.000E-03       |
| 5 | 2000  | -DeltaK  | -0.690(179)E-03      | -0.000E-03       |
| 6 | 1100  | -DeltaJK | 1.037(213)E-03       | 0.000E-03        |
| 7 | 40100 | -deltaJ  | -0.099700000( 0)E-03 | -0.000000000E-03 |
| 8 | 41000 | -deltaK  | 0.705000000( 0)E-03  | -0.000000000E-03 |

MICROWAVE AVG = -0.000092 MHz, IR AVG = 0.00000

MICROWAVE RMS = 0.065774 MHz, IR RMS = 0.00000

### wwudu SPFIT Output

EXP.FREQ. - CALC.FREQ. - DIFF. - EXP.ERR.- EST.ERR.-AVG. CALC.FREQ. - DIFF. - WT.

|    |               |             |             |          |         |         |
|----|---------------|-------------|-------------|----------|---------|---------|
| 1: | 6 3 3 5 2 3   | 10818.09000 | 10817.86565 | 0.22435  | 0.10000 | 0.08198 |
| 2: | 6 4 2 5 3 2   | 11165.62000 | 11165.70568 | -0.08568 | 0.10000 | 0.09366 |
| 3: | 6 4 3 5 3 3   | 11553.57000 | 11553.78950 | -0.21950 | 0.10000 | 0.05643 |
| 4: | 6 5 2 5 4 2   | 12106.44000 | 12106.37389 | 0.06611  | 0.10000 | 0.08541 |
| 5: | 9 4 6 8 3 6   | 16887.46000 | 16887.60821 | -0.14821 | 0.10000 | 0.08583 |
| 6: | 9 6 4 8 5 4   | 17289.13000 | 17288.96497 | 0.16503  | 0.10000 | 0.08164 |
| 7: | 12 4 9 11 4 8 | 16196.74000 | 16196.74526 | -0.00526 | 0.10000 | 0.09998 |

NORMALIZED DIAGONAL:

|   |              |   |              |   |              |   |              |   |              |   |              |
|---|--------------|---|--------------|---|--------------|---|--------------|---|--------------|---|--------------|
| 1 | 1.00000E+000 | 2 | 6.45338E-001 | 3 | 6.29570E-002 | 4 | 1.75425E-001 | 5 | 9.82020E-001 | 6 | 1.00000E+000 |
| 7 | 1.00000E+000 | 8 | 1.00000E+000 |   |              |   |              |   |              |   |              |

MARQUARDT PARAMETER = 0, TRUST EXPANSION = 1.00

NEW PARAMETER (EST. ERROR) -- CHANGE THIS ITERATION

|   |       |          |                      |                  |
|---|-------|----------|----------------------|------------------|
| 1 | 10000 | A        | 1099.9200(213)       | -0.0000          |
| 2 | 20000 | B        | 841.9109(137)        | 0.0000           |
| 3 | 30000 | C        | 561.918( 94)         | 0.000            |
| 4 | 200   | -DeltaJ  | -0.782( 76)E-03      | 0.000E-03        |
| 5 | 2000  | -DeltaK  | -0.01217( 79)        | -0.00000         |
| 6 | 1100  | -DeltaJK | 2.540000000( 0)E-03  | -0.000000000E-03 |
| 7 | 40100 | -deltaJ  | -0.152000000( 0)E-03 | -0.000000000E-03 |
| 8 | 41000 | -deltaK  | 1.750000000( 0)E-03  | -0.000000000E-03 |

MICROWAVE AVG = -0.000451 MHz, IR AVG = 0.00000

MICROWAVE RMS = 0.150927 MHz, IR RMS = 0.00000

### wwwuwu SPFIT Output

EXP.FREQ. - CALC.FREQ. - DIFF. - EXP.ERR.- EST.ERR.-AVG. CALC.FREQ. - DIFF. - WT.

|     |                 |             |             |          |         |         |
|-----|-----------------|-------------|-------------|----------|---------|---------|
| 1:  | 5 2 4 4 1 4     | 11493.78000 | 11493.77968 | 0.00032  | 0.10000 | 0.07403 |
| 2:  | 7 4 4 6 3 4     | 17082.38000 | 17082.34895 | 0.03105  | 0.10000 | 0.07494 |
| 3:  | 9 2 8 8 2 7     | 12665.57000 | 12665.52778 | 0.04222  | 0.10000 | 0.06691 |
| 4:  | 10 1 10 9 0 9   | 12890.39000 | 12890.36405 | 0.02595  | 0.10000 | 0.06384 |
| 5:  | 10 9 1 9 8 1    | 11579.51000 | 11579.49323 | 0.01677  | 0.10000 | 0.09314 |
| 6:  | 11 5 7 10 5 6   | 16834.46000 | 16834.38640 | 0.07360  | 0.10000 | 0.06641 |
| 7:  | 11 10 2 10 8 3  | 16792.26000 | 16792.43347 | -0.17347 | 0.10000 | 0.04711 |
| 8:  | 12 1 12 11 1 11 | 15356.67000 | 15356.68925 | -0.01925 | 0.10000 | 0.09365 |
| 9:  | 12 4 8 12 5 8   | 13333.34000 | 13333.32328 | 0.01672  | 0.10000 | 0.09341 |
| 10: | 15 6 10 14 7 8  | 12434.88000 | 12434.87407 | 0.00593  | 0.10000 | 0.09916 |
| 11: | 16 4 12 16 5 12 | 12866.27000 | 12866.27898 | -0.00898 | 0.10000 | 0.08989 |
| 12: | 17 4 14 16 5 12 | 15137.97000 | 15137.95739 | 0.01261  | 0.10000 | 0.09817 |

NORMALIZED DIAGONAL:

|   |              |   |              |   |              |   |              |   |              |   |              |
|---|--------------|---|--------------|---|--------------|---|--------------|---|--------------|---|--------------|
| 1 | 1.00000E+000 | 2 | 8.13693E-001 | 3 | 2.02882E-001 | 4 | 2.06796E-001 | 5 | 9.40170E-001 | 6 | 2.27801E-002 |
| 7 | 1.50284E-001 | 8 | 4.58860E-001 |   |              |   |              |   |              |   |              |

MARQUARDT PARAMETER = 0, TRUST EXPANSION = 1.00

NEW PARAMETER (EST. ERROR) -- CHANGE THIS ITERATION

|   |       |          |                 |            |
|---|-------|----------|-----------------|------------|
| 1 | 10000 | A        | 1663.8654(136)  | -0.0000    |
| 2 | 20000 | B        | 879.0923( 74)   | 0.0000     |
| 3 | 30000 | C        | 618.6094(107)   | -0.0000    |
| 4 | 200   | -DeltaJ  | -1.774( 70)E-03 | -0.000E-03 |
| 5 | 2000  | -DeltaK  | -6.190(180)E-03 | -0.000E-03 |
| 6 | 1100  | -DeltaJK | 5.766(248)E-03  | 0.000E-03  |
| 7 | 40100 | -deltaJ  | 0.449( 38)E-03  | -0.000E-03 |
| 8 | 41000 | -deltaK  | -1.058(115)E-03 | 0.000E-03  |

MICROWAVE AVG = 0.001956 MHz, IR AVG = 0.00000

MICROWAVE RMS = 0.057831 MHz, IR RMS = 0.00000

### wwdwd SPFIT Output

EXP.FREQ. - CALC.FREQ. - DIFF. - EXP.ERR.- EST.ERR.-AVG. CALC.FREQ. - DIFF. - WT.

|     |                 |             |             |          |         |         |             |          |        |
|-----|-----------------|-------------|-------------|----------|---------|---------|-------------|----------|--------|
| 1:  | 7 2 5 6 5 1     | 16537.48000 | 16537.59496 | -0.11496 | 0.10000 | 0.07095 |             |          |        |
| 2:  | 8 5 3 8 6 3     | 11062.45000 | 11062.33661 | 0.11339  | 0.10000 | 0.05281 |             |          |        |
| 3:  | 8 6 2 8 7 2     | 12815.64000 | 12815.66617 | -0.02617 | 0.10000 | 0.07869 | 12815.65812 | -0.01812 | 0.5000 |
| 4:  | 8 8 1 8 5 3     | 12815.64000 | 12815.65006 | -0.01006 | 0.10000 | 0.07869 | 12815.65812 | -0.01812 | 0.5000 |
| 5:  | 9 5 5 9 4 5     | 11000.91000 | 11000.91351 | -0.00351 | 0.10000 | 0.05042 |             |          |        |
| 6:  | 10 1 10 9 1 9   | 13139.50000 | 13139.42921 | 0.07079  | 0.10000 | 0.08094 |             |          |        |
| 7:  | 10 2 9 9 2 8    | 14161.38000 | 14161.34682 | 0.03318  | 0.10000 | 0.06936 |             |          |        |
| 8:  | 11 5 6 10 5 5   | 17192.21000 | 17192.13739 | 0.07261  | 0.10000 | 0.08646 |             |          |        |
| 9:  | 12 1 11 11 1 10 | 16700.90000 | 16700.96638 | -0.06638 | 0.10000 | 0.08191 |             |          |        |
| 10: | 12 4 8 12 5 8   | 12573.30000 | 12573.34172 | -0.04172 | 0.10000 | 0.06302 |             |          |        |
| 11: | 14 3 12 13 12 2 | 10480.21000 | 10480.22694 | -0.01694 | 0.10000 | 0.09605 |             |          |        |
| 12: | 16 12 4 16 11 6 | 13196.84000 | 13196.85535 | -0.01535 | 0.10000 | 0.09917 |             |          |        |
| 13: | 17 4 13 17 5 13 | 12113.02000 | 12112.96460 | 0.05540  | 0.10000 | 0.07682 |             |          |        |
| 14: | 21 18 3 21 17 5 | 15058.29000 | 15058.31579 | -0.02579 | 0.10000 | 0.09468 |             |          |        |

NORMALIZED DIAGONAL:

|   |              |   |              |   |              |   |              |   |              |   |              |
|---|--------------|---|--------------|---|--------------|---|--------------|---|--------------|---|--------------|
| 1 | 1.00000E+000 | 2 | 9.14076E-001 | 3 | 1.29434E-001 | 4 | 9.99747E-001 | 5 | 6.25221E-002 | 6 | 1.78570E-002 |
| 7 | 2.48723E-001 | 8 | 5.86764E-001 |   |              |   |              |   |              |   |              |

MARQUARDT PARAMETER = 0, TRUST EXPANSION = 1.00

NEW PARAMETER (EST. ERROR) -- CHANGE THIS ITERATION

|   |       |          |                 |            |
|---|-------|----------|-----------------|------------|
| 1 | 10000 | A        | 1630.1266(144)  | 0.0000     |
| 2 | 20000 | B        | 895.6917(175)   | 0.0000     |
| 3 | 30000 | C        | 631.7337(192)   | -0.0000    |
| 4 | 200   | -DeltaJ  | -1.416( 90)E-03 | -0.000E-03 |
| 5 | 2000  | -DeltaK  | -3.219(168)E-03 | -0.000E-03 |
| 6 | 1100  | -DeltaJK | 2.062(263)E-03  | 0.000E-03  |
| 7 | 40100 | -deltaJ  | 0.257( 34)E-03  | 0.000E-03  |
| 8 | 41000 | -deltaK  | -0.671(115)E-03 | -0.000E-03 |

MICROWAVE AVG = 0.003276 MHz, IR AVG = 0.00000

MICROWAVE RMS = 0.060891 MHz, IR RMS = 0.00000

### wwwwd SPFIT Output

EXP.FREQ. - CALC.FREQ. - DIFF. - EXP.ERR.- EST.ERR.-AVG. CALC.FREQ. - DIFF. - WT.

|                     |             |             |          |         |         |             |          |        |  |
|---------------------|-------------|-------------|----------|---------|---------|-------------|----------|--------|--|
| 1: 8 5 3 8 4 5      | 12804.99000 | 12805.06233 | -0.07233 | 0.10000 | 0.06851 |             |          |        |  |
| 2: 8 6 2 8 7 2      | 14816.40000 | 14816.43668 | -0.03668 | 0.10000 | 0.06608 | 14816.43250 | -0.03250 | 0.2000 |  |
| 3: 8 8 1 8 5 3      | 14816.40000 | 14816.43146 | -0.03146 | 0.10000 | 0.06608 | 14816.43250 | -0.03250 | 0.8000 |  |
| 4: 9 1 8 8 1 7      | 12737.52000 | 12737.51465 | 0.00535  | 0.10000 | 0.06142 |             |          |        |  |
| 5: 9 1 9 8 0 8      | 11579.51000 | 11579.50925 | 0.00075  | 0.10000 | 0.04744 |             |          |        |  |
| 6: 10 1 10 9 0 9    | 12799.09000 | 12798.96912 | 0.12088  | 0.10000 | 0.06951 |             |          |        |  |
| 7: 10 3 7 9 3 6     | 15274.78000 | 15274.76750 | 0.01250  | 0.10000 | 0.06455 |             |          |        |  |
| 8: 11 2 10 10 2 9   | 15082.33000 | 15082.34437 | -0.01437 | 0.10000 | 0.04561 |             |          |        |  |
| 9: 11 7 4 11 6 6    | 16731.27000 | 16731.24684 | 0.02316  | 0.10000 | 0.06733 | 16731.23381 | 0.03619  | 0.5000 |  |
| 10: 11 7 5 11 4 7   | 16731.27000 | 16731.22078 | 0.04922  | 0.10000 | 0.06733 | 16731.23381 | 0.03619  | 0.5000 |  |
| 11: 13 5 8 13 6 8   | 16621.88000 | 16621.84974 | 0.03026  | 0.10000 | 0.07510 |             |          |        |  |
| 12: 13 13 0 12 12 0 | 10625.00000 | 10625.15190 | -0.15190 | 0.10000 | 0.07381 |             |          |        |  |
| 13: 15 3 12 15 4 12 | 12301.67000 | 12301.71641 | -0.04641 | 0.10000 | 0.05727 |             |          |        |  |
| 14: 15 11 4 15 10 6 | 14488.45000 | 14488.37342 | 0.07658  | 0.10000 | 0.09288 |             |          |        |  |
| 15: 17 3 14 16 4 12 | 12368.74000 | 12368.69624 | 0.04376  | 0.10000 | 0.09767 |             |          |        |  |
| 16: 17 3 14 17 4 14 | 12684.51000 | 12684.58206 | -0.07206 | 0.10000 | 0.08256 |             |          |        |  |
| 17: 25 20 6 25 21 4 | 15137.97000 | 15137.96015 | 0.00985  | 0.10000 | 0.09976 |             |          |        |  |

NORMALIZED DIAGONAL:

1 1.00000E+000 2 1.75705E-001 3 9.87771E-001 4 8.84008E-001 5 8.05712E-002 6 1.87466E-002  
7 4.37870E-001 8 5.90973E-001

MARQUARDT PARAMETER = 0, TRUST EXPANSION = 1.00

NEW PARAMETER (EST. ERROR) -- CHANGE THIS ITERATION

|   |       |          |                 |             |
|---|-------|----------|-----------------|-------------|
| 1 | 10000 | A        | 1737.4850(148)  | -0.0000     |
| 2 | 20000 | B        | 866.9146( 56)   | -0.0000     |
| 3 | 30000 | C        | 613.2547( 73)   | -0.0000     |
| 4 | 200   | -DeltaJ  | -0.813( 57)E-03 | 0.000E-03   |
| 5 | 2000  | -DeltaK  | -1.710(146)E-03 | 0.000E-03   |
| 6 | 1100  | -DeltaJK | 0.997(166)E-03  | -0.000E-03  |
| 7 | 40100 | -deltaJ  | 0.2717(251)E-03 | -0.0000E-03 |
| 8 | 41000 | -deltaK  | -0.485( 60)E-03 | 0.000E-03   |

MICROWAVE AVG = -0.003563 MHz, IR AVG = 0.00000

MICROWAVE RMS = 0.064195 MHz, IR RMS = 0.00000

### wwwdd SPFIT Output

EXP.FREQ. - CALC.FREQ. - DIFF. - EXP.ERR.- EST.ERR.-AVG. CALC.FREQ. - DIFF. - WT.

|                       |             |             |          |         |         |             |          |        |  |
|-----------------------|-------------|-------------|----------|---------|---------|-------------|----------|--------|--|
| 1: 7 4 4 6 4 3        | 12931.25000 | 12931.24752 | 0.00248  | 0.10000 | 0.09999 |             |          |        |  |
| 2: 8 7 1 7 7 0        | 16164.42000 | 16164.42307 | -0.00307 | 0.10000 | 0.09999 |             |          |        |  |
| 3: 10 1 9 9 1 8       | 14523.34000 | 14523.33973 | 0.00027  | 0.10000 | 0.07071 |             |          |        |  |
| 4: 10 1 9 10 1 10     | 10909.20000 | 10909.32869 | -0.12869 | 0.10000 | 0.07861 |             |          |        |  |
| 5: 10 2 9 9 2 8       | 14523.34000 | 14523.33955 | 0.00045  | 0.10000 | 0.07071 |             |          |        |  |
| 6: 13 3 10 13 3 11    | 12026.68000 | 12026.52980 | 0.15020  | 0.10000 | 0.06927 | 12026.52983 | 0.15017  | 0.6667 |  |
| 7: 13 4 10 13 2 11    | 12026.68000 | 12026.52991 | 0.15009  | 0.10000 | 0.06927 | 12026.52983 | 0.15017  | 0.3333 |  |
| 8: 17 3 14 17 3 15    | 16628.15000 | 16628.15868 | -0.00868 | 0.10000 | 0.09992 | 16628.15868 | -0.00868 | 0.5000 |  |
| 9: 17 4 14 17 2 15    | 16628.15000 | 16628.15868 | -0.00868 | 0.10000 | 0.09992 | 16628.15868 | -0.00868 | 0.5000 |  |
| 10: 20 7 13 20 7 14   | 15376.74000 | 15376.73865 | 0.00135  | 0.10000 | 0.09993 | 15376.73870 | 0.00130  | 0.5000 |  |
| 11: 20 8 13 20 6 14   | 15376.74000 | 15376.73875 | 0.00125  | 0.10000 | 0.09993 | 15376.73870 | 0.00130  | 0.5000 |  |
| 12: 22 11 11 22 11 12 | 12844.58000 | 12844.63341 | -0.05341 | 0.10000 | 0.09669 |             |          |        |  |
| 13: 22 13 10 22 11 11 | 11566.97000 | 11566.93409 | 0.03591  | 0.10000 | 0.09850 |             |          |        |  |

NORMALIZED DIAGONAL:

|   |              |   |              |   |              |   |              |   |              |   |              |
|---|--------------|---|--------------|---|--------------|---|--------------|---|--------------|---|--------------|
| 1 | 1.00000E+000 | 2 | 5.93398E-001 | 3 | 9.89076E-002 | 4 | 9.99938E-001 | 5 | 2.62638E-001 | 6 | 4.22835E-003 |
| 7 | 2.21624E-001 | 8 | 9.53733E-001 |   |              |   |              |   |              |   |              |

MARQUARDT PARAMETER = 0, TRUST EXPANSION = 1.00

NEW PARAMETER (EST. ERROR) -- CHANGE THIS ITERATION

|   |       |          |                 |            |
|---|-------|----------|-----------------|------------|
| 1 | 10000 | A        | 1289.219( 44)   | -0.000     |
| 2 | 20000 | B        | 1148.9067(149)  | 0.0000     |
| 3 | 30000 | C        | 640.0460(175)   | -0.0000    |
| 4 | 200   | -DeltaJ  | -3.111(289)E-03 | 0.000E-03  |
| 5 | 2000  | -DeltaK  | -7.02( 80)E-03  | 0.00E-03   |
| 6 | 1100  | -DeltaJK | 9.51(104)E-03   | -0.00E-03  |
| 7 | 40100 | -deltaJ  | 0.980(137)E-03  | -0.000E-03 |
| 8 | 41000 | -deltaK  | -0.01680(244)   | 0.00000    |

MICROWAVE AVG = -0.000327 MHz, IR AVG = 0.00000

MICROWAVE RMS = 0.065838 MHz, IR RMS = 0.00000



### wwdwu SPFIT Output

EXP.FREQ. - CALC.FREQ. - DIFF. - EXP.ERR.- EST.ERR.-AVG. CALC.FREQ. - DIFF. - WT.

|                     |             |             |          |         |         |             |                 |
|---------------------|-------------|-------------|----------|---------|---------|-------------|-----------------|
| 1: 4 4 0 3 3 0      | 12844.58000 | 12844.69507 | -0.11507 | 0.10000 | 0.08937 |             |                 |
| 2: 8 1 7 7 1 6      | 11488.77000 | 11488.65123 | 0.11877  | 0.10000 | 0.09775 | 11488.70851 | 0.06149 0.5000  |
| 3: 9 1 9 8 1 8      | 11488.77000 | 11488.76579 | 0.00421  | 0.10000 | 0.09775 | 11488.70851 | 0.06149 0.5000  |
| 4: 9 7 2 9 8 2      | 16731.27000 | 16731.27536 | -0.00536 | 0.10000 | 0.07088 | 16731.27513 | -0.00513 0.5000 |
| 5: 9 9 1 9 6 3      | 16731.27000 | 16731.27490 | -0.00490 | 0.10000 | 0.07088 | 16731.27513 | -0.00513 0.5000 |
| 6: 10 4 7 9 4 6     | 15022.28000 | 15022.34293 | -0.06293 | 0.10000 | 0.05071 |             |                 |
| 7: 10 7 3 10 6 5    | 16704.24000 | 16704.19779 | 0.04221  | 0.10000 | 0.06608 |             |                 |
| 8: 11 4 7 10 6 4    | 16441.28000 | 16441.29719 | -0.01719 | 0.10000 | 0.05371 |             |                 |
| 9: 11 5 7 10 5 6    | 16495.48000 | 16495.35230 | 0.12770  | 0.10000 | 0.04964 |             |                 |
| 10: 11 6 6 10 6 5   | 16441.28000 | 16441.27551 | 0.00449  | 0.10000 | 0.05371 |             |                 |
| 11: 12 0 12 11 0 11 | 15137.97000 | 15137.86874 | 0.10126  | 0.10000 | 0.08214 |             |                 |
| 12: 12 4 8 12 5 8   | 14565.79000 | 14565.89261 | -0.10261 | 0.10000 | 0.05088 |             |                 |
| 13: 12 12 0 12 11 2 | 10532.44000 | 10532.28112 | 0.15888  | 0.10000 | 0.06153 |             |                 |
| 14: 14 3 11 14 4 11 | 12286.91000 | 12287.01219 | -0.10219 | 0.10000 | 0.07335 |             |                 |
| 15: 16 10 7 15 9 7  | 12434.88000 | 12434.98259 | -0.10259 | 0.10000 | 0.08782 |             |                 |
| 16: 17 3 14 16 4 12 | 12271.85000 | 12271.97336 | -0.12336 | 0.10000 | 0.08727 |             |                 |
| 17: 20 15 6 19 14 6 | 16804.03000 | 16803.93894 | 0.09106  | 0.10000 | 0.09179 |             |                 |

NORMALIZED DIAGONAL:

|   |              |   |              |   |              |   |              |   |              |   |              |
|---|--------------|---|--------------|---|--------------|---|--------------|---|--------------|---|--------------|
| 1 | 1.00000E+000 | 2 | 7.03643E-001 | 3 | 9.26018E-001 | 4 | 1.32055E-001 | 5 | 2.12669E-001 | 6 | 2.75650E-002 |
| 7 | 8.28099E-002 | 8 | 6.41196E-001 |   |              |   |              |   |              |   |              |

MARQUARDT PARAMETER = 0, TRUST EXPANSION = 1.00

NEW PARAMETER (EST. ERROR) -- CHANGE THIS ITERATION

|   |       |          |                 |             |
|---|-------|----------|-----------------|-------------|
| 1 | 10000 | A        | 1729.2085(151)  | -0.0000     |
| 2 | 20000 | B        | 862.1585(121)   | 0.0000      |
| 3 | 30000 | C        | 609.0836(138)   | -0.0000     |
| 4 | 200   | -DeltaJ  | -0.571( 63)E-03 | -0.000E-03  |
| 5 | 2000  | -DeltaK  | -2.537( 95)E-03 | 0.000E-03   |
| 6 | 1100  | -DeltaJK | 0.827(164)E-03  | 0.000E-03   |
| 7 | 40100 | -deltaJ  | 0.1757(250)E-03 | -0.0000E-03 |
| 8 | 41000 | -deltaK  | -0.403( 54)E-03 | -0.000E-03  |

MICROWAVE AVG = -0.002933 MHz, IR AVG = 0.00000

MICROWAVE RMS = 0.093063 MHz, IR RMS = 0.00000

### wwwdu SPFIT Output

EXP.FREQ. - CALC.FREQ. - DIFF. - EXP.ERR.- EST.ERR.-AVG. CALC.FREQ. - DIFF. - WT.

|    |                 |             |             |          |         |         |             |          |        |  |  |  |  |  |  |  |  |  |  |  |
|----|-----------------|-------------|-------------|----------|---------|---------|-------------|----------|--------|--|--|--|--|--|--|--|--|--|--|--|
| 1: | 5 5 1 4 4 1     | 12349.90000 | 12349.88393 | 0.01607  | 0.10000 | 0.09991 |             |          |        |  |  |  |  |  |  |  |  |  |  |  |
| 2: | 6 3 4 5 3 3     | 10625.00000 | 10624.76064 | 0.23936  | 0.10000 | 0.07735 |             |          |        |  |  |  |  |  |  |  |  |  |  |  |
| 3: | 8 2 6 7 2 5     | 13275.00000 | 13275.26652 | -0.26652 | 0.10000 | 0.06610 | 13275.28341 | -0.28341 | 0.5000 |  |  |  |  |  |  |  |  |  |  |  |
| 4: | 8 3 6 7 2 5     | 13275.00000 | 13275.30030 | -0.30030 | 0.10000 | 0.06610 | 13275.28341 | -0.28341 | 0.5000 |  |  |  |  |  |  |  |  |  |  |  |
| 5: | 8 6 2 7 6 1     | 17192.21000 | 17192.21120 | -0.00120 | 0.10000 | 0.10000 |             |          |        |  |  |  |  |  |  |  |  |  |  |  |
| 6: | 11 0 11 10 0 10 | 15065.50000 | 15065.43087 | 0.06913  | 0.10000 | 0.09831 | 15065.43087 | 0.06913  | 0.2500 |  |  |  |  |  |  |  |  |  |  |  |
| 7: | 11 0 11 10 1 10 | 15065.50000 | 15065.43087 | 0.06913  | 0.10000 | 0.09831 | 15065.43087 | 0.06913  | 0.2500 |  |  |  |  |  |  |  |  |  |  |  |
| 8: | 11 1 11 10 0 10 | 15065.50000 | 15065.43087 | 0.06913  | 0.10000 | 0.09831 | 15065.43087 | 0.06913  | 0.2500 |  |  |  |  |  |  |  |  |  |  |  |
| 9: | 11 1 11 10 1 10 | 15065.50000 | 15065.43087 | 0.06913  | 0.10000 | 0.09831 | 15065.43087 | 0.06913  | 0.2500 |  |  |  |  |  |  |  |  |  |  |  |

NORMALIZED DIAGONAL:

|   |              |   |              |   |              |   |              |   |              |   |              |
|---|--------------|---|--------------|---|--------------|---|--------------|---|--------------|---|--------------|
| 1 | 1.00000E+000 | 2 | 8.01660E-001 | 3 | 2.29972E-001 | 4 | 9.99839E-001 | 5 | 1.00000E+000 | 6 | 1.00000E+000 |
| 7 | 1.00000E+000 | 8 | 1.00000E+000 |   |              |   |              |   |              |   |              |

MARQUARDT PARAMETER = 0, TRUST EXPANSION = 1.00

NEW PARAMETER (EST. ERROR) -- CHANGE THIS ITERATION

|   |       |          |                      |                  |
|---|-------|----------|----------------------|------------------|
| 1 | 10000 | A        | 1255.4737(107)       | -0.0000          |
| 2 | 20000 | B        | 1153.5225( 79)       | 0.0000           |
| 3 | 30000 | C        | 660.3352(176)        | 0.0000           |
| 4 | 200   | -DeltaJ  | -1.183( 76)E-03      | -0.000E-03       |
| 5 | 2000  | -DeltaK  | -1.160000000( 0)E-03 | -0.000000000E-03 |
| 6 | 1100  | -DeltaJK | 1.600000000( 0)E-03  | -0.000000000E-03 |
| 7 | 40100 | -deltaJ  | 0.044200000( 0)E-03  | -0.000000000E-03 |
| 8 | 41000 | -deltaK  | -0.094900000( 0)E-03 | 0.000000000E-03  |

MICROWAVE AVG = 0.007988 MHz, IR AVG = 0.00000

MICROWAVE RMS = 0.168910 MHz, IR RMS = 0.00000

### wwwud SPFIT Output

EXP.FREQ. - CALC.FREQ. - DIFF. - EXP.ERR.- EST.ERR.-AVG. CALC.FREQ. - DIFF. - WT.

|    |                |             |             |          |         |         |             |          |        |
|----|----------------|-------------|-------------|----------|---------|---------|-------------|----------|--------|
| 1: | 6 5 2 5 4 2    | 14458.78000 | 14458.89935 | -0.11935 | 0.10000 | 0.08898 |             |          |        |
| 2: | 7 4 3 6 3 3    | 16692.42000 | 16692.52508 | -0.10508 | 0.10000 | 0.09157 |             |          |        |
| 3: | 7 4 4 6 3 4    | 16770.32000 | 16770.11231 | 0.20769  | 0.10000 | 0.06079 |             |          |        |
| 4: | 11 1 10 10 2 9 | 16385.84000 | 16385.84019 | -0.00019 | 0.10000 | 0.10000 | 16385.84019 | -0.00019 | 0.5000 |
| 5: | 11 2 10 10 1 9 | 16385.84000 | 16385.84020 | -0.00020 | 0.10000 | 0.10000 | 16385.84019 | -0.00019 | 0.5000 |

NORMALIZED DIAGONAL:

|   |              |   |              |   |              |   |              |   |              |   |              |
|---|--------------|---|--------------|---|--------------|---|--------------|---|--------------|---|--------------|
| 1 | 1.00000E+000 | 2 | 4.82895E-001 | 3 | 9.91164E-001 | 4 | 1.00000E+000 | 5 | 1.00000E+000 | 6 | 1.00000E+000 |
| 7 | 1.00000E+000 | 8 | 1.00000E+000 |   |              |   |              |   |              |   |              |

MARQUARDT PARAMETER = 0, TRUST EXPANSION = 1.00

NEW PARAMETER (EST. ERROR) -- CHANGE THIS ITERATION

|   |       |          |                      |                  |
|---|-------|----------|----------------------|------------------|
| 1 | 10000 | A        | 1243.0912(207)       | -0.0000          |
| 2 | 20000 | B        | 1159.5080(146)       | 0.0000           |
| 3 | 30000 | C        | 673.0738( 53)        | 0.0000           |
| 4 | 200   | -DeltaJ  | -0.897000000( 0)E-03 | -0.000000000E-03 |
| 5 | 2000  | -DeltaK  | -0.943000000( 0)E-03 | 0.000000000E-03  |
| 6 | 1100  | -DeltaJK | 1.500000000( 0)E-03  | 0.000000000E-03  |
| 7 | 40100 | -deltaJ  | 8.600000000( 0)E-06  | -0.000000000E-06 |
| 8 | 41000 | -deltaK  | -0.122000000( 0)E-03 | 0.000000000E-03  |

MICROWAVE AVG = -0.004235 MHz, IR AVG = 0.00000

MICROWAVE RMS = 0.130786 MHz, IR RMS = 0.00000

### wwwwd' SPFIT Output

EXP.FREQ. - CALC.FREQ. - DIFF. - EXP.ERR.- EST.ERR.-AVG. CALC.FREQ. - DIFF. - WT.

|     |                |             |             |          |         |         |             |         |        |
|-----|----------------|-------------|-------------|----------|---------|---------|-------------|---------|--------|
| 1:  | 3 3 0 2 2 0    | 10516.03000 | 10515.97987 | 0.05013  | 0.10000 | 0.09031 |             |         |        |
| 2:  | 4 2 2 3 1 2    | 11263.93000 | 11264.02222 | -0.09222 | 0.10000 | 0.06220 |             |         |        |
| 3:  | 5 3 2 4 3 1    | 11191.69000 | 11191.64018 | 0.04982  | 0.10000 | 0.07425 |             |         |        |
| 4:  | 6 4 3 5 4 2    | 12862.47000 | 12862.45926 | 0.01074  | 0.10000 | 0.06243 |             |         |        |
| 5:  | 8 1 7 7 1 6    | 15058.30000 | 15058.31911 | -0.01911 | 0.10000 | 0.09296 |             |         |        |
| 6:  | 10 0 10 9 0 9  | 16854.97000 | 16855.00107 | -0.03107 | 0.10000 | 0.09963 | 16854.96421 | 0.00579 | 0.2500 |
| 7:  | 10 0 10 9 1 9  | 16854.97000 | 16854.90163 | 0.06837  | 0.10000 | 0.09963 | 16854.96421 | 0.00579 | 0.2500 |
| 8:  | 10 1 10 9 0 9  | 16854.97000 | 16855.02680 | -0.05680 | 0.10000 | 0.09963 | 16854.96421 | 0.00579 | 0.2500 |
| 9:  | 10 1 10 9 1 9  | 16854.97000 | 16854.92735 | 0.04265  | 0.10000 | 0.09963 | 16854.96421 | 0.00579 | 0.2500 |
| 10: | 12 4 9 12 3 10 | 12580.58000 | 12580.57951 | 0.00049  | 0.10000 | 0.09999 |             |         |        |

NORMALIZED DIAGONAL:

|   |              |   |              |   |              |   |              |   |              |   |              |
|---|--------------|---|--------------|---|--------------|---|--------------|---|--------------|---|--------------|
| 1 | 1.00000E+000 | 2 | 8.48551E-001 | 3 | 3.69263E-001 | 4 | 9.93270E-001 | 5 | 1.83724E-001 | 6 | 1.00000E+000 |
| 7 | 1.00000E+000 | 8 | 1.00000E+000 |   |              |   |              |   |              |   |              |

MARQUARDT PARAMETER = 0, TRUST EXPANSION = 1.00

NEW PARAMETER (EST. ERROR) -- CHANGE THIS ITERATION

|   |       |          |                      |                  |
|---|-------|----------|----------------------|------------------|
| 1 | 10000 | A        | 1903.7763(184)       | -0.0000          |
| 2 | 20000 | B        | 1255.0177(104)       | 0.0000           |
| 3 | 30000 | C        | 807.8090(133)        | -0.0000          |
| 4 | 200   | -DeltaJ  | -1.687( 66)E-03      | -0.000E-03       |
| 5 | 2000  | -DeltaK  | -4.304(111)E-03      | 0.000E-03        |
| 6 | 1100  | -DeltaJK | 5.180000000( 0)E-03  | 0.000000000E-03  |
| 7 | 40100 | -deltaJ  | -0.359000000( 0)E-03 | -0.000000000E-03 |
| 8 | 41000 | -deltaK  | 2.390000000( 0)E-03  | 0.000000000E-03  |

MICROWAVE AVG = 0.000804 MHz, IR AVG = 0.00000

MICROWAVE RMS = 0.044745 MHz, IR RMS = 0.00000

### wwwu SPFIT Output

EXP.FREQ. - CALC.FREQ. - DIFF. - EXP.ERR.- EST.ERR.-AVG. CALC.FREQ. - DIFF. - WT.

|                    |             |             |          |         |         |
|--------------------|-------------|-------------|----------|---------|---------|
| 1: 5 4 1 4 3 1     | 16804.03000 | 16804.07097 | -0.04097 | 0.10000 | 0.09860 |
| 2: 6 5 1 5 2 3     | 16746.88000 | 16746.84524 | 0.03476  | 0.10000 | 0.09898 |
| 3: 7 1 7 6 1 6     | 11584.02000 | 11584.03449 | -0.01449 | 0.10000 | 0.09983 |
| 4: 7 7 1 7 4 3     | 12360.68000 | 12360.67869 | 0.00131  | 0.10000 | 0.10000 |
| 5: 8 0 8 7 0 7     | 13139.50000 | 13139.44462 | 0.05538  | 0.10000 | 0.09747 |
| 6: 8 4 4 7 4 3     | 16499.97000 | 16499.98619 | -0.01619 | 0.10000 | 0.09979 |
| 7: 9 9 0 8 8 0     | 14862.51000 | 14862.53399 | -0.02399 | 0.10000 | 0.09951 |
| 8: 13 2 11 13 2 12 | 16196.74000 | 16196.57099 | 0.16901  | 0.10000 | 0.07315 |
| 9: 13 3 11 13 1 12 | 16201.69000 | 16201.84952 | -0.15952 | 0.10000 | 0.07602 |

NORMALIZED DIAGONAL:

|   |              |   |              |   |              |   |              |   |              |   |              |
|---|--------------|---|--------------|---|--------------|---|--------------|---|--------------|---|--------------|
| 1 | 1.00000E+000 | 2 | 3.01866E-002 | 3 | 1.78586E-001 | 4 | 9.99192E-001 | 5 | 1.02958E-001 | 6 | 2.45571E-003 |
| 7 | 9.27772E-001 | 8 | 3.97164E-001 |   |              |   |              |   |              |   |              |

MARQUARDT PARAMETER = 0, TRUST EXPANSION = 1.00

NEW PARAMETER (EST. ERROR) -- CHANGE THIS ITERATION

|   |       |          |                |          |
|---|-------|----------|----------------|----------|
| 1 | 10000 | A        | 1976.920( 32)  | 0.000    |
| 2 | 20000 | B        | 1216.80( 39)   | -0.00    |
| 3 | 30000 | C        | 775.399( 70)   | 0.000    |
| 4 | 200   | -DeltaJ  | -8.37(188)E-03 | 0.00E-03 |
| 5 | 2000  | -DeltaK  | -0.0152( 35)   | 0.0000   |
| 6 | 1100  | -DeltaJK | 0.0240( 55)    | -0.0000  |
| 7 | 40100 | -deltaJ  | -5.08(159)E-03 | 0.00E-03 |
| 8 | 41000 | -deltaK  | 0.0123( 34)    | -0.0000  |

MICROWAVE AVG = 0.000591 MHz, IR AVG = 0.00000

MICROWAVE RMS = 0.082335 MHz, IR RMS = 0.00000

### wwwwd SPFIT Output

EXP.FREQ. - CALC.FREQ. - DIFF. - EXP.ERR.- EST.ERR.-AVG. CALC.FREQ. - DIFF. - WT.

|     |               |             |             |          |         |         |             |         |        |
|-----|---------------|-------------|-------------|----------|---------|---------|-------------|---------|--------|
| 1:  | 5 3 2 4 2 2   | 14606.25000 | 14606.25200 | -0.00200 | 0.10000 | 0.09957 |             |         |        |
| 2:  | 5 4 1 4 4 0   | 10516.02000 | 10516.00768 | 0.01232  | 0.10000 | 0.08189 |             |         |        |
| 3:  | 6 3 4 5 3 3   | 12379.56000 | 12379.57628 | -0.01628 | 0.10000 | 0.06511 |             |         |        |
| 4:  | 7 2 5 6 2 4   | 15022.28000 | 15022.27439 | 0.00561  | 0.10000 | 0.09653 |             |         |        |
| 5:  | 9 0 9 8 0 8   | 14945.49000 | 14945.71377 | -0.22377 | 0.10000 | 0.10000 | 14945.48988 | 0.00012 | 0.5000 |
| 6:  | 9 1 9 8 1 8   | 14945.49000 | 14945.26600 | 0.22400  | 0.10000 | 0.10000 | 14945.48988 | 0.00012 | 0.5000 |
| 7:  | 9 5 4 9 6 4   | 11474.61000 | 11474.60906 | 0.00094  | 0.10000 | 0.09990 |             |         |        |
| 8:  | 9 9 0 8 8 0   | 15303.33000 | 15303.32788 | 0.00212  | 0.10000 | 0.09952 |             |         |        |
| 9:  | 10 7 4 9 6 4  | 11586.38000 | 11586.38133 | -0.00133 | 0.10000 | 0.09981 |             |         |        |
| 10: | 12 6 6 12 5 8 | 12945.01000 | 12945.01097 | -0.00097 | 0.10000 | 0.09990 |             |         |        |

NORMALIZED DIAGONAL:

|   |              |   |              |   |              |   |              |   |              |   |              |
|---|--------------|---|--------------|---|--------------|---|--------------|---|--------------|---|--------------|
| 1 | 1.00000E+000 | 2 | 3.14768E-001 | 3 | 1.97473E-001 | 4 | 6.34188E-001 | 5 | 9.61090E-001 | 6 | 1.02783E-002 |
| 7 | 5.72427E-002 | 8 | 3.64298E-001 |   |              |   |              |   |              |   |              |

MARQUARDT PARAMETER = 0, TRUST EXPANSION = 1.00

NEW PARAMETER (EST. ERROR) -- CHANGE THIS ITERATION

|   |       |          |                 |            |
|---|-------|----------|-----------------|------------|
| 1 | 10000 | A        | 1946.976( 36)   | 0.000      |
| 2 | 20000 | B        | 1235.962( 45)   | 0.000      |
| 3 | 30000 | C        | 789.894( 66)    | -0.000     |
| 4 | 200   | -DeltaJ  | -6.51( 57)E-03  | -0.00E-03  |
| 5 | 2000  | -DeltaK  | -0.01753(192)   | -0.00000   |
| 6 | 1100  | -DeltaJK | 0.02606(276)    | 0.00000    |
| 7 | 40100 | -deltaJ  | -1.329(143)E-03 | -0.000E-03 |
| 8 | 41000 | -deltaK  | 3.96( 66)E-03   | -0.00E-03  |

MICROWAVE AVG = 0.000058 MHz, IR AVG = 0.00000

MICROWAVE RMS = 0.007152 MHz, IR RMS = 0.00000

### D4\_uduud SPFIT Output

EXP.FREQ. - CALC.FREQ. - DIFF. - EXP.ERR.- EST.ERR.-AVG. CALC.FREQ. - DIFF. - WT.

|     |                  |             |             |          |         |         |             |          |        |  |
|-----|------------------|-------------|-------------|----------|---------|---------|-------------|----------|--------|--|
| 1:  | 11 7 4 10 6 4    | 12390.74000 | 12390.77150 | -0.03150 | 0.10000 | 0.04583 |             |          |        |  |
| 2:  | 12 7 5 11 7 4    | 11532.27000 | 11532.20620 | 0.06380  | 0.10000 | 0.05283 |             |          |        |  |
| 3:  | 13 9 4 12 8 4    | 14641.35000 | 14641.35110 | -0.00110 | 0.10000 | 0.04129 |             |          |        |  |
| 4:  | 13 10 4 12 9 4   | 14642.32000 | 14642.41037 | -0.09037 | 0.10000 | 0.04369 |             |          |        |  |
| 5:  | 13 13 0 12 12 1  | 14758.17000 | 14758.16240 | 0.00760  | 0.10000 | 0.09927 |             |          |        |  |
| 6:  | 14 4 10 13 3 10  | 15774.66000 | 15774.61313 | 0.04687  | 0.10000 | 0.07031 |             |          |        |  |
| 7:  | 14 8 7 13 7 6    | 12898.91000 | 12898.88257 | 0.02743  | 0.10000 | 0.04946 |             |          |        |  |
| 8:  | 14 11 3 13 10 4  | 17250.80000 | 17250.78883 | 0.01117  | 0.10000 | 0.09945 |             |          |        |  |
| 9:  | 16 6 11 15 5 10  | 13381.14000 | 13381.18346 | -0.04346 | 0.10000 | 0.06116 |             |          |        |  |
| 10: | 17 9 8 16 9 7    | 15837.43000 | 15837.39254 | 0.03746  | 0.10000 | 0.05448 | 15837.39255 | 0.03745  | 0.5000 |  |
| 11: | 17 10 8 16 9 7   | 15837.43000 | 15837.39255 | 0.03745  | 0.10000 | 0.05448 | 15837.39255 | 0.03745  | 0.5000 |  |
| 12: | 18 7 11 17 7 10  | 15635.19000 | 15635.21512 | -0.02512 | 0.10000 | 0.04639 | 15635.21512 | -0.02512 | 0.5000 |  |
| 13: | 18 8 11 17 7 10  | 15635.19000 | 15635.21512 | -0.02512 | 0.10000 | 0.04639 | 15635.21512 | -0.02512 | 0.5000 |  |
| 14: | 19 8 11 18 8 10  | 16762.32000 | 16762.32033 | -0.00033 | 0.10000 | 0.07128 |             |          |        |  |
| 15: | 20 5 16 19 4 15  | 15675.25000 | 15675.27265 | -0.02265 | 0.10000 | 0.05525 |             |          |        |  |
| 16: | 21 0 21 20 0 20  | 14588.93000 | 14588.92178 | 0.00822  | 0.10000 | 0.09959 | 14588.92178 | 0.00822  | 0.5000 |  |
| 17: | 21 1 21 20 0 20  | 14588.93000 | 14588.92178 | 0.00822  | 0.10000 | 0.09959 | 14588.92178 | 0.00822  | 0.5000 |  |
| 18: | 22 4 18 21 4 17  | 17043.73000 | 17043.71736 | 0.01264  | 0.10000 | 0.08625 |             |          |        |  |
| 19: | 29 23 7 30 14 16 | 11857.85000 | 11857.84980 | 0.00020  | 0.10000 | 0.09999 |             |          |        |  |

NORMALIZED DIAGONAL:

|   |              |   |              |   |              |   |              |   |              |   |              |
|---|--------------|---|--------------|---|--------------|---|--------------|---|--------------|---|--------------|
| 1 | 1.00000E+000 | 2 | 1.87293E-001 | 3 | 6.81362E-002 | 4 | 9.20200E-001 | 5 | 2.60338E-001 | 6 | 1.36467E-002 |
| 7 | 4.23302E-001 | 8 | 5.22129E-002 |   |              |   |              |   |              |   |              |

MARQUARDT PARAMETER = 0, TRUST EXPANSION = 1.00

NEW PARAMETER (EST. ERROR) -- CHANGE THIS ITERATION

|   |       |          |                  |             |
|---|-------|----------|------------------|-------------|
| 1 | 10000 | A        | 568.0733(130)    | 0.0000      |
| 2 | 20000 | B        | 558.7972( 79)    | 0.0000      |
| 3 | 30000 | C        | 342.0587( 81)    | 0.0000      |
| 4 | 200   | -DeltaJ  | 0.5(107)E-06     | -0.0E-06    |
| 5 | 2000  | -DeltaK  | -0.2005(275)E-03 | 0.0000E-03  |
| 6 | 1100  | -DeltaJK | 0.232( 36)E-03   | -0.000E-03  |
| 7 | 40100 | -deltaJ  | 0.0398(191)E-03  | -0.0000E-03 |
| 8 | 41000 | -deltaK  | -3.73( 59)E-03   | 0.00E-03    |

MICROWAVE AVG = 0.000053 MHz, IR AVG = 0.00000  
MICROWAVE RMS = 0.036249 MHz, IR RMS = 0.00000

### D4\_wudud SPFIT Output

EXP.FREQ. - CALC.FREQ. - DIFF. - EXP.ERR.- EST.ERR.-AVG. CALC.FREQ. - DIFF. - WT.

|                     |             |             |          |         |         |             |          |        |  |
|---------------------|-------------|-------------|----------|---------|---------|-------------|----------|--------|--|
| 1: 8 6 3 7 5 3      | 11215.08000 | 11215.07709 | 0.00291  | 0.10000 | 0.00000 |             |          |        |  |
| 2: 8 6 3 7 5 3      | 11215.08000 | 11215.07709 | 0.00291  | 0.10000 | 0.00000 |             |          |        |  |
| 3: 9 3 6 8 2 6      | 11501.14000 | 11501.14541 | -0.00541 | 0.10000 | 0.00000 |             |          |        |  |
| 4: 9 9 1 8 8 1      | 13945.15000 | 13945.15363 | -0.00363 | 0.10000 | 0.00000 |             |          |        |  |
| 5: 12 5 7 11 4 7    | 14982.40000 | 14982.39474 | 0.00526  | 0.10000 | 0.00000 |             |          |        |  |
| 6: 12 11 2 11 10 2  | 18112.50000 | 18112.49799 | 0.00201  | 0.10000 | 0.00000 |             |          |        |  |
| 7: 13 1 12 12 1 11  | 11308.88000 | 11308.84339 | 0.03661  | 0.10000 | 0.00000 | 11308.84592 | 0.03408  | 0.5000 |  |
| 8: 13 2 12 12 1 11  | 11308.88000 | 11308.84845 | 0.03155  | 0.10000 | 0.00000 | 11308.84592 | 0.03408  | 0.5000 |  |
| 9: 15 3 12 14 3 11  | 13962.24000 | 13962.03362 | 0.20638  | 0.10000 | 0.00000 | 13962.27953 | -0.03953 | 0.5000 |  |
| 10: 15 4 12 14 3 11 | 13962.24000 | 13962.52543 | -0.28543 | 0.10000 | 0.00000 | 13962.27953 | -0.03953 | 0.5000 |  |
| 11: 19 0 19 18 0 18 | 15661.28000 | 15661.29429 | -0.01429 | 0.10000 | 0.00000 | 15661.29429 | -0.01429 | 0.5000 |  |
| 12: 19 1 19 18 0 18 | 15661.28000 | 15661.29429 | -0.01429 | 0.10000 | 0.00000 | 15661.29429 | -0.01429 | 0.5000 |  |
| 13: 20 2 18 19 2 17 | 17492.22000 | 17492.20154 | 0.01846  | 0.10000 | 0.00000 | 17492.20155 | 0.01845  | 0.5000 |  |
| 14: 20 3 18 19 2 17 | 17492.22000 | 17492.20156 | 0.01844  | 0.10000 | 0.00000 | 17492.20155 | 0.01845  | 0.5000 |  |

NORMALIZED DIAGONAL:

|   |              |   |              |   |              |   |              |   |              |   |              |
|---|--------------|---|--------------|---|--------------|---|--------------|---|--------------|---|--------------|
| 1 | 1.00000E+000 | 2 | 9.75160E-001 | 3 | 2.54893E-001 | 4 | 8.97902E-002 | 5 | 9.98066E-001 | 6 | 1.17145E-002 |
| 7 | 2.66032E-001 | 8 | 6.44877E-001 |   |              |   |              |   |              |   |              |

MARQUARDT PARAMETER = 0, TRUST EXPANSION = 1.00

NEW PARAMETER (EST. ERROR) -- CHANGE THIS ITERATION

|   |       |          |                  |             |
|---|-------|----------|------------------|-------------|
| 1 | 10000 | A        | 790.7318(108)    | -0.0000     |
| 2 | 20000 | B        | 575.1071(104)    | 0.0000      |
| 3 | 30000 | C        | 405.4978( 67)    | -0.0000     |
| 4 | 200   | -DeltaJ  | 0.115( 36)E-03   | -0.000E-03  |
| 5 | 2000  | -DeltaK  | 1.361(195)E-03   | -0.000E-03  |
| 6 | 1100  | -DeltaJK | -1.557(222)E-03  | 0.000E-03   |
| 7 | 40100 | -deltaJ  | -0.0288(213)E-03 | -0.0000E-03 |
| 8 | 41000 | -deltaK  | 0.282(231)E-03   | -0.000E-03  |

MICROWAVE AVG = 0.000276 MHz, IR AVG = 0.00000

MICROWAVE RMS = 0.018328 MHz, IR RMS = 0.00000



### D4\_wuudu SPFIT Output

EXP.FREQ. - CALC.FREQ. - DIFF. - EXP.ERR.- EST.ERR.-AVG. CALC.FREQ. - DIFF. - WT.

|                     |             |             |          |         |         |             |          |        |  |
|---------------------|-------------|-------------|----------|---------|---------|-------------|----------|--------|--|
| 1: 7 7 1 6 6 1      | 10744.88000 | 10744.88292 | -0.00292 | 0.10000 | 0.00000 |             |          |        |  |
| 2: 7 7 1 6 6 1      | 10744.88000 | 10744.88292 | -0.00292 | 0.10000 | 0.00000 |             |          |        |  |
| 3: 9 8 2 8 7 2      | 13342.25000 | 13342.23748 | 0.01252  | 0.10000 | 0.00000 |             |          |        |  |
| 4: 10 7 4 9 6 4     | 13829.39000 | 13829.39713 | -0.00713 | 0.10000 | 0.00000 |             |          |        |  |
| 5: 11 11 1 10 10 1  | 17046.32000 | 17046.32173 | -0.00173 | 0.10000 | 0.00000 |             |          |        |  |
| 6: 15 1 14 14 1 13  | 12662.51000 | 12662.52180 | -0.01180 | 0.10000 | 0.00000 | 12662.52181 | -0.01181 | 0.5000 |  |
| 7: 15 2 14 14 1 13  | 12662.51000 | 12662.52182 | -0.01182 | 0.10000 | 0.00000 | 12662.52181 | -0.01181 | 0.5000 |  |
| 8: 16 0 16 15 0 15  | 12891.15000 | 12891.18438 | -0.03438 | 0.10000 | 0.00000 | 12891.18438 | -0.03438 | 0.5000 |  |
| 9: 16 1 16 15 0 15  | 12891.15000 | 12891.18438 | -0.03438 | 0.10000 | 0.00000 | 12891.18438 | -0.03438 | 0.5000 |  |
| 10: 18 1 17 17 1 16 | 15025.59000 | 15025.50894 | 0.08106  | 0.10000 | 0.00000 | 15025.50894 | 0.08106  | 0.5000 |  |
| 11: 18 2 17 17 1 16 | 15025.59000 | 15025.50894 | 0.08106  | 0.10000 | 0.00000 | 15025.50894 | 0.08106  | 0.5000 |  |
| 12: 19 5 14 18 5 13 | 18081.09000 | 18081.00531 | 0.08469  | 0.10000 | 0.00000 | 18081.08400 | 0.00600  | 0.5000 |  |
| 13: 19 6 14 18 5 13 | 18081.09000 | 18081.16268 | -0.07268 | 0.10000 | 0.00000 | 18081.08400 | 0.00600  | 0.5000 |  |
| 14: 20 2 18 19 2 17 | 17160.90000 | 17160.94137 | -0.04137 | 0.10000 | 0.00000 | 17160.94137 | -0.04137 | 0.5000 |  |
| 15: 20 3 18 19 2 17 | 17160.90000 | 17160.94137 | -0.04137 | 0.10000 | 0.00000 | 17160.94137 | -0.04137 | 0.5000 |  |

NORMALIZED DIAGONAL:

|   |              |   |              |   |              |   |              |   |              |   |              |
|---|--------------|---|--------------|---|--------------|---|--------------|---|--------------|---|--------------|
| 1 | 1.00000E+000 | 2 | 5.39988E-001 | 3 | 1.66235E-001 | 4 | 3.31494E-002 | 5 | 5.80645E-001 | 6 | 3.04726E-003 |
| 7 | 2.57526E-001 | 8 | 9.99697E-001 |   |              |   |              |   |              |   |              |

MARQUARDT PARAMETER = 0, TRUST EXPANSION = 1.00

NEW PARAMETER (EST. ERROR) -- CHANGE THIS ITERATION

|   |       |          |                |           |
|---|-------|----------|----------------|-----------|
| 1 | 10000 | A        | 787.0991(103)  | 0.0000    |
| 2 | 20000 | B        | 592.981( 94)   | 0.000     |
| 3 | 30000 | C        | 394.2108(112)  | -0.0000   |
| 4 | 200   | -DeltaJ  | 2.089(112)E-03 | 0.000E-03 |
| 5 | 2000  | -DeltaK  | 1.62( 71)E-03  | 0.00E-03  |
| 6 | 1100  | -DeltaJK | -3.87( 79)E-03 | -0.00E-03 |
| 7 | 40100 | -deltaJ  | 0.527( 53)E-03 | 0.000E-03 |
| 8 | 41000 | -deltaK  | -2.79( 79)E-03 | 0.00E-03  |

MICROWAVE AVG = -0.000268 MHz, IR AVG = 0.00000

MICROWAVE RMS = 0.031412 MHz, IR RMS = 0.00000

### D4\_wuduu SPFIT Output

EXP.FREQ. - CALC.FREQ. - DIFF. - EXP.ERR.- EST.ERR.-AVG. CALC.FREQ. - DIFF. - WT.

|                     |             |             |          |         |         |             |          |        |  |
|---------------------|-------------|-------------|----------|---------|---------|-------------|----------|--------|--|
| 1: 7 7 1 6 6 1      | 10842.82000 | 10842.82015 | -0.00015 | 0.10000 | 0.00000 |             |          |        |  |
| 2: 7 7 1 6 6 1      | 10842.82000 | 10842.82015 | -0.00015 | 0.10000 | 0.00000 |             |          |        |  |
| 3: 10 9 2 9 8 2     | 15037.50000 | 15037.49996 | 0.00004  | 0.10000 | 0.00000 |             |          |        |  |
| 4: 11 11 1 10 10 1  | 17217.60000 | 17217.59990 | 0.00010  | 0.10000 | 0.00000 |             |          |        |  |
| 5: 15 1 14 14 1 13  | 12741.43000 | 12741.37297 | 0.05703  | 0.10000 | 0.00000 | 12741.37301 | 0.05699  | 0.5000 |  |
| 6: 15 2 14 14 1 13  | 12741.43000 | 12741.37305 | 0.05695  | 0.10000 | 0.00000 | 12741.37301 | 0.05699  | 0.5000 |  |
| 7: 16 3 13 15 3 12  | 14633.90000 | 14633.91827 | -0.01827 | 0.10000 | 0.00000 | 14633.93984 | -0.03984 | 0.5000 |  |
| 8: 16 4 13 15 3 12  | 14633.90000 | 14633.96142 | -0.06142 | 0.10000 | 0.00000 | 14633.93984 | -0.03984 | 0.5000 |  |
| 9: 17 0 17 16 0 16  | 13787.49000 | 13787.53856 | -0.04856 | 0.10000 | 0.00000 | 13787.53856 | -0.04856 | 0.5000 |  |
| 10: 17 1 17 16 0 16 | 13787.49000 | 13787.53856 | -0.04856 | 0.10000 | 0.00000 | 13787.53856 | -0.04856 | 0.5000 |  |
| 11: 19 4 15 18 4 14 | 17566.11000 | 17566.05408 | 0.05592  | 0.10000 | 0.00000 | 17566.06393 | 0.04607  | 0.5000 |  |
| 12: 19 5 15 18 4 14 | 17566.11000 | 17566.07378 | 0.03622  | 0.10000 | 0.00000 | 17566.06393 | 0.04607  | 0.5000 |  |
| 13: 20 1 19 19 1 18 | 16713.22000 | 16713.17914 | 0.04086  | 0.10000 | 0.00000 | 16713.17914 | 0.04086  | 0.5000 |  |
| 14: 20 2 19 19 1 18 | 16713.22000 | 16713.17914 | 0.04086  | 0.10000 | 0.00000 | 16713.17914 | 0.04086  | 0.5000 |  |
| 15: 20 3 17 19 3 16 | 17804.33000 | 17804.38413 | -0.05413 | 0.10000 | 0.00000 | 17804.38420 | -0.05420 | 0.5000 |  |
| 16: 20 4 17 19 3 16 | 17804.33000 | 17804.38427 | -0.05427 | 0.10000 | 0.00000 | 17804.38420 | -0.05420 | 0.5000 |  |

NORMALIZED DIAGONAL:

|   |              |   |              |   |              |   |              |   |              |   |              |
|---|--------------|---|--------------|---|--------------|---|--------------|---|--------------|---|--------------|
| 1 | 1.00000E+000 | 2 | 2.25785E-001 | 3 | 1.34924E-001 | 4 | 2.44986E-002 | 5 | 5.96865E-001 | 6 | 4.20162E-003 |
| 7 | 2.58077E-001 | 8 | 9.96925E-001 |   |              |   |              |   |              |   |              |

MARQUARDT PARAMETER = 0, TRUST EXPANSION = 1.00

NEW PARAMETER (EST. ERROR) -- CHANGE THIS ITERATION

|   |       |          |                 |            |
|---|-------|----------|-----------------|------------|
| 1 | 10000 | A        | 794.7696(117)   | 0.0000     |
| 2 | 20000 | B        | 585.089(118)    | -0.000     |
| 3 | 30000 | C        | 397.5055(149)   | 0.0000     |
| 4 | 200   | -DeltaJ  | 4.403(108)E-03  | -0.000E-03 |
| 5 | 2000  | -DeltaK  | 0.01432( 44)    | -0.00000   |
| 6 | 1100  | -DeltaJK | -0.01861( 50)   | 0.00000    |
| 7 | 40100 | -deltaJ  | -0.293( 59)E-03 | 0.000E-03  |
| 8 | 41000 | -deltaK  | 0.01020( 43)    | -0.00000   |

MICROWAVE AVG = 0.000117 MHz, IR AVG = 0.00000

MICROWAVE RMS = 0.037313 MHz, IR RMS = 0.00000

### D4\_wdudu SPFIT Output

EXP.FREQ. - CALC.FREQ. - DIFF. - EXP.ERR.- EST.ERR.-AVG. CALC.FREQ. - DIFF. - WT.

|     |                 |             |             |          |         |         |             |          |        |
|-----|-----------------|-------------|-------------|----------|---------|---------|-------------|----------|--------|
| 1:  | 9 9 1 8 8 1     | 13851.28000 | 13851.29920 | -0.01920 | 0.10000 | 0.00000 |             |          |        |
| 2:  | 9 9 1 8 8 1     | 13851.28000 | 13851.29920 | -0.01920 | 0.10000 | 0.00000 |             |          |        |
| 3:  | 10 10 1 9 9 1   | 15421.06000 | 15420.99639 | 0.06361  | 0.10000 | 0.00000 |             |          |        |
| 4:  | 11 11 1 10 10 1 | 16990.62000 | 16990.64648 | -0.02648 | 0.10000 | 0.00000 |             |          |        |
| 5:  | 12 2 10 11 2 9  | 11098.74000 | 11098.79815 | -0.05815 | 0.10000 | 0.00000 |             |          |        |
| 6:  | 13 0 13 12 0 12 | 10906.82000 | 10906.83386 | -0.01386 | 0.10000 | 0.00000 | 10906.83387 | -0.01387 | 0.5000 |
| 7:  | 13 1 13 12 0 12 | 10906.82000 | 10906.83389 | -0.01389 | 0.10000 | 0.00000 | 10906.83387 | -0.01387 | 0.5000 |
| 8:  | 14 2 12 13 2 11 | 12734.10000 | 12734.01918 | 0.08082  | 0.10000 | 0.00000 |             |          |        |
| 9:  | 19 0 19 18 0 18 | 15817.40000 | 15817.44027 | -0.04027 | 0.10000 | 0.00000 | 15817.44027 | -0.04027 | 0.5000 |
| 10: | 19 1 19 18 0 18 | 15817.40000 | 15817.44027 | -0.04027 | 0.10000 | 0.00000 | 15817.44027 | -0.04027 | 0.5000 |
| 11: | 19 1 18 18 1 17 | 16318.88000 | 16318.79207 | 0.08793  | 0.10000 | 0.00000 | 16318.79207 | 0.08793  | 0.5000 |
| 12: | 19 2 18 18 1 17 | 16318.88000 | 16318.79207 | 0.08793  | 0.10000 | 0.00000 | 16318.79207 | 0.08793  | 0.5000 |
| 13: | 19 3 16 18 3 15 | 17328.21000 | 17328.32253 | -0.11253 | 0.10000 | 0.00000 | 17328.32308 | -0.11308 | 0.5000 |
| 14: | 19 4 16 18 3 15 | 17328.21000 | 17328.32363 | -0.11363 | 0.10000 | 0.00000 | 17328.32308 | -0.11308 | 0.5000 |
| 15: | 19 4 15 18 4 14 | 17839.44000 | 17839.38787 | 0.05213  | 0.10000 | 0.00000 |             |          |        |

NORMALIZED DIAGONAL:

|   |              |   |              |   |              |   |              |   |              |   |              |
|---|--------------|---|--------------|---|--------------|---|--------------|---|--------------|---|--------------|
| 1 | 1.00000E+000 | 2 | 2.63529E-001 | 3 | 1.44163E-001 | 4 | 2.00148E-002 | 5 | 7.04968E-001 | 6 | 1.12313E-003 |
| 7 | 1.47727E-001 | 8 | 9.97840E-001 |   |              |   |              |   |              |   |              |

MARQUARDT PARAMETER = 0, TRUST EXPANSION = 1.00

NEW PARAMETER (EST. ERROR) -- CHANGE THIS ITERATION

|   |       |          |                |            |
|---|-------|----------|----------------|------------|
| 1 | 10000 | A        | 785.234( 32)   | -0.000     |
| 2 | 20000 | B        | 577.807(119)   | 0.000      |
| 3 | 30000 | C        | 410.0023(105)  | 0.0000     |
| 4 | 200   | -DeltaJ  | 1.837(114)E-03 | -0.000E-03 |
| 5 | 2000  | -DeltaK  | 0.01847(186)   | -0.00000   |
| 6 | 1100  | -DeltaJK | -0.02075(192)  | 0.00000    |
| 7 | 40100 | -deltaJ  | 0.749( 58)E-03 | -0.000E-03 |
| 8 | 41000 | -deltaK  | 0.02174(298)   | -0.00000   |

MICROWAVE AVG = -0.000524 MHz, IR AVG = 0.00000

MICROWAVE RMS = 0.060639 MHz, IR RMS = 0.00000

### D4\_wduud SPFIT Output

EXP.FREQ. - CALC.FREQ. - DIFF. - EXP.ERR.- EST.ERR.-AVG. CALC.FREQ. - DIFF. - WT.

|     |                 |             |             |          |         |         |             |                 |
|-----|-----------------|-------------|-------------|----------|---------|---------|-------------|-----------------|
| 1:  | 7 7 1 6 6 1     | 10553.27000 | 10553.31651 | -0.04651 | 0.10000 | 0.00000 |             |                 |
| 2:  | 7 7 1 6 6 1     | 10553.27000 | 10553.31651 | -0.04651 | 0.10000 | 0.00000 |             |                 |
| 3:  | 8 4 4 7 3 4     | 10624.71000 | 10624.72442 | -0.01442 | 0.10000 | 0.00000 |             |                 |
| 4:  | 10 8 3 9 7 3    | 14225.14000 | 14225.03952 | 0.10048  | 0.10000 | 0.00000 |             |                 |
| 5:  | 11 6 5 10 5 5   | 14507.79000 | 14507.79613 | -0.00613 | 0.10000 | 0.00000 |             |                 |
| 6:  | 11 11 1 10 10 1 | 16713.22000 | 16713.13200 | 0.08800  | 0.10000 | 0.00000 |             |                 |
| 7:  | 12 11 2 11 10 2 | 17774.87000 | 17774.97277 | -0.10277 | 0.10000 | 0.00000 |             |                 |
| 8:  | 14 3 12 13 2 11 | 12233.38000 | 12233.32256 | 0.05744  | 0.10000 | 0.00000 |             |                 |
| 9:  | 15 0 15 14 0 14 | 11771.15000 | 11771.10288 | 0.04712  | 0.10000 | 0.00000 | 11771.10288 | 0.04712 0.5000  |
| 10: | 15 1 15 14 0 14 | 11771.15000 | 11771.10288 | 0.04712  | 0.10000 | 0.00000 | 11771.10288 | 0.04712 0.5000  |
| 11: | 17 0 17 16 0 16 | 13298.38000 | 13298.54150 | -0.16150 | 0.10000 | 0.00000 | 13298.54150 | -0.16150 0.5000 |
| 12: | 17 1 17 16 0 16 | 13298.38000 | 13298.54150 | -0.16150 | 0.10000 | 0.00000 | 13298.54150 | -0.16150 0.5000 |
| 13: | 19 0 19 18 0 18 | 14825.58000 | 14825.54593 | 0.03407  | 0.10000 | 0.00000 | 14825.54593 | 0.03407 0.5000  |
| 14: | 19 0 19 18 1 18 | 14825.58000 | 14825.54593 | 0.03407  | 0.10000 | 0.00000 | 14825.54593 | 0.03407 0.5000  |
| 15: | 17 3 14 16 3 13 | 15137.52000 | 15137.50815 | 0.01185  | 0.10000 | 0.00000 | 15137.50817 | 0.01183 0.5000  |
| 16: | 17 4 14 16 3 13 | 15137.52000 | 15137.50819 | 0.01181  | 0.10000 | 0.00000 | 15137.50817 | 0.01183 0.5000  |
| 17: | 18 3 16 17 2 15 | 15286.92000 | 15286.82873 | 0.09127  | 0.10000 | 0.00000 |             |                 |
| 18: | 20 2 18 19 2 17 | 16812.92000 | 16813.02660 | -0.10660 | 0.10000 | 0.00000 | 16813.02660 | -0.10660 0.5000 |
| 19: | 20 3 18 19 2 17 | 16812.92000 | 16813.02660 | -0.10660 | 0.10000 | 0.00000 | 16813.02660 | -0.10660 0.5000 |
| 20: | 23 1 23 22 1 22 | 17878.09000 | 17878.04784 | 0.04216  | 0.10000 | 0.00000 | 17878.04784 | 0.04216 0.5000  |
| 21: | 23 0 23 22 1 22 | 17878.09000 | 17878.04784 | 0.04216  | 0.10000 | 0.00000 | 17878.04784 | 0.04216 0.5000  |

NORMALIZED DIAGONAL:

|   |              |   |              |   |              |   |              |   |              |   |              |
|---|--------------|---|--------------|---|--------------|---|--------------|---|--------------|---|--------------|
| 1 | 1.00000E+000 | 2 | 9.61765E-001 | 3 | 2.53278E-001 | 4 | 5.76259E-002 | 5 | 9.98015E-001 | 6 | 8.00406E-003 |
| 7 | 2.97597E-001 | 8 | 7.45278E-001 |   |              |   |              |   |              |   |              |

MARQUARDT PARAMETER = 0, TRUST EXPANSION = 1.00

NEW PARAMETER (EST. ERROR) -- CHANGE THIS ITERATION

|   |       |          |                 |            |
|---|-------|----------|-----------------|------------|
| 1 | 10000 | A        | 771.0529( 87)   | 0.0000     |
| 2 | 20000 | B        | 623.7929(136)   | -0.0000    |
| 3 | 30000 | C        | 382.2803( 44)   | 0.0000     |
| 4 | 200   | -DeltaJ  | -1.375( 45)E-03 | 0.000E-03  |
| 5 | 2000  | -DeltaK  | -1.734(144)E-03 | 0.000E-03  |
| 6 | 1100  | -DeltaJK | 2.848(182)E-03  | -0.000E-03 |
| 7 | 40100 | -deltaJ  | 0.4463(242)E-03 | 0.0000E-03 |
| 8 | 41000 | -deltaK  | -2.627(230)E-03 | 0.000E-03  |

MICROWAVE AVG = -0.000805 MHz, IR AVG = 0.00000

MICROWAVE RMS = 0.076310 MHz, IR RMS = 0.00000

### D4\_wwduu SPFIT Output

EXP.FREQ. - CALC.FREQ. - DIFF. - EXP.ERR.- EST.ERR.-AVG. CALC.FREQ. - DIFF. - WT.

|     |                 |             |             |          |         |         |             |          |        |  |  |  |  |  |  |  |  |  |  |  |
|-----|-----------------|-------------|-------------|----------|---------|---------|-------------|----------|--------|--|--|--|--|--|--|--|--|--|--|--|
| 1:  | 8 3 5 7 2 5     | 12698.86000 | 12698.85367 | 0.00633  | 0.10000 | 0.09634 |             |          |        |  |  |  |  |  |  |  |  |  |  |  |
| 2:  | 8 4 5 7 3 5     | 13383.40000 | 13383.39430 | 0.00570  | 0.10000 | 0.09703 |             |          |        |  |  |  |  |  |  |  |  |  |  |  |
| 3:  | 8 6 3 7 5 3     | 14592.76000 | 14592.75944 | 0.00056  | 0.10000 | 0.09997 |             |          |        |  |  |  |  |  |  |  |  |  |  |  |
| 4:  | 9 2 8 8 1 8     | 15122.06000 | 15122.05137 | 0.00863  | 0.10000 | 0.09307 |             |          |        |  |  |  |  |  |  |  |  |  |  |  |
| 5:  | 9 3 7 8 2 7     | 15003.19000 | 15003.20991 | -0.01991 | 0.10000 | 0.05363 |             |          |        |  |  |  |  |  |  |  |  |  |  |  |
| 6:  | 10 3 8 9 3 7    | 11318.19000 | 11318.19297 | -0.00297 | 0.10000 | 0.09921 |             |          |        |  |  |  |  |  |  |  |  |  |  |  |
| 7:  | 12 4 8 11 4 7   | 15023.42000 | 15023.41897 | 0.00103  | 0.10000 | 0.09992 |             |          |        |  |  |  |  |  |  |  |  |  |  |  |
| 8:  | 13 4 10 12 3 9  | 14955.66000 | 14955.65833 | 0.00167  | 0.10000 | 0.09974 |             |          |        |  |  |  |  |  |  |  |  |  |  |  |
| 9:  | 14 0 14 13 0 13 | 13605.03000 | 13605.03023 | -0.00023 | 0.10000 | 0.09999 | 13605.03025 | -0.00025 | 0.5000 |  |  |  |  |  |  |  |  |  |  |  |
| 10: | 14 1 14 13 0 13 | 13605.03000 | 13605.03027 | -0.00027 | 0.10000 | 0.09999 | 13605.03025 | -0.00025 | 0.5000 |  |  |  |  |  |  |  |  |  |  |  |

NORMALIZED DIAGONAL:

|   |              |   |              |   |              |   |              |   |              |   |              |
|---|--------------|---|--------------|---|--------------|---|--------------|---|--------------|---|--------------|
| 1 | 1.00000E+000 | 2 | 3.73296E-001 | 3 | 1.73101E-001 | 4 | 3.16977E-002 | 5 | 9.91559E-001 | 6 | 5.83192E-003 |
| 7 | 8.54996E-001 | 8 | 5.50536E-001 |   |              |   |              |   |              |   |              |

MARQUARDT PARAMETER = 0, TRUST EXPANSION = 1.00

NEW PARAMETER (EST. ERROR) -- CHANGE THIS ITERATION

|   |       |          |                |           |
|---|-------|----------|----------------|-----------|
| 1 | 10000 | A        | 1049.542( 65)  | 0.000     |
| 2 | 20000 | B        | 713.4666(229)  | -0.0000   |
| 3 | 30000 | C        | 472.7719(150)  | -0.0000   |
| 4 | 200   | -DeltaJ  | -2.08( 36)E-03 | 0.00E-03  |
| 5 | 2000  | -DeltaK  | -6.15(110)E-03 | 0.00E-03  |
| 6 | 1100  | -DeltaJK | 7.70(139)E-03  | -0.00E-03 |
| 7 | 40100 | -deltaJ  | 1.064(229)E-03 | 0.000E-03 |
| 8 | 41000 | -deltaK  | -5.90(112)E-03 | 0.00E-03  |

MICROWAVE AVG = 0.000087 MHz, IR AVG = 0.00000

MICROWAVE RMS = 0.007865 MHz, IR RMS = 0.00000

### D4\_wwudu SPFIT Output

EXP.FREQ. - CALC.FREQ. - DIFF. - EXP.ERR.- EST.ERR.-AVG. CALC.FREQ. - DIFF. - WT.

|    |    |   |    |    |   |    |             |             |          |         |         |
|----|----|---|----|----|---|----|-------------|-------------|----------|---------|---------|
| 1: | 7  | 6 | 2  | 6  | 5 | 2  | 12731.46000 | 12731.46005 | -0.00005 | 0.10000 | 0.10000 |
| 2: | 13 | 2 | 11 | 12 | 2 | 10 | 14663.08000 | 14663.06127 | 0.01873  | 0.10000 | 0.07066 |
| 3: | 13 | 2 | 11 | 12 | 3 | 10 | 14662.49000 | 14662.50870 | -0.01870 | 0.10000 | 0.07076 |
| 4: | 25 | 3 | 23 | 25 | 2 | 24 | 15415.21000 | 15415.20998 | 0.00002  | 0.10000 | 0.10000 |

NORMALIZED DIAGONAL:

1 1.00000E+000 2 4.12490E-001 3 7.79589E-001

MARQUARDT PARAMETER = 0, TRUST EXPANSION = 1.00

NEW PARAMETER (EST. ERROR) -- CHANGE THIS ITERATION

|   |       |   |                |          |
|---|-------|---|----------------|----------|
| 1 | 10000 | A | 985.4447(102)  | -0.0000  |
| 2 | 20000 | B | 725.1953( 67)  | -0.0000  |
| 3 | 30000 | C | 500.20201(278) | -0.00000 |

MICROWAVE AVG = -0.000002 MHz, IR AVG = 0.00000

MICROWAVE RMS = 0.013233 MHz, IR RMS = 0.00000

### D4\_wwdud SPFIT Output

EXP.FREQ. - CALC.FREQ. - DIFF. - EXP.ERR.- EST.ERR.-AVG. CALC.FREQ. - DIFF. - WT.

|     |               |             |             |          |         |         |             |         |        |
|-----|---------------|-------------|-------------|----------|---------|---------|-------------|---------|--------|
| 1:  | 6 6 0 5 5 0   | 11260.56000 | 11260.77672 | -0.21672 | 0.10000 | 0.07107 | 11260.51443 | 0.04557 | 0.5000 |
| 2:  | 6 6 1 5 5 0   | 11260.56000 | 11260.25215 | 0.30785  | 0.10000 | 0.07107 | 11260.51443 | 0.04557 | 0.5000 |
| 3:  | 6 6 1 5 5 1   | 11262.51000 | 11262.55602 | -0.04602 | 0.10000 | 0.07037 |             |         |        |
| 4:  | 8 7 2 7 6 2   | 14482.99000 | 14482.98976 | 0.00024  | 0.10000 | 0.10000 |             |         |        |
| 5:  | 9 5 5 8 5 4   | 11755.02000 | 11755.02025 | -0.00025 | 0.10000 | 0.10000 |             |         |        |
| 6:  | 10 2 8 9 3 7  | 11866.66000 | 11866.65912 | 0.00088  | 0.10000 | 0.09986 |             |         |        |
| 7:  | 10 3 7 9 2 7  | 16413.86000 | 16413.85962 | 0.00038  | 0.10000 | 0.10000 |             |         |        |
| 8:  | 10 3 8 9 2 7  | 11880.92000 | 11880.92024 | -0.00024 | 0.10000 | 0.10013 |             |         |        |
| 9:  | 11 3 8 10 3 7 | 13576.86000 | 13576.86057 | -0.00057 | 0.10000 | 0.09999 |             |         |        |
| 10: | 11 4 7 10 3 7 | 17888.10000 | 17888.10008 | -0.00008 | 0.10000 | 0.09999 |             |         |        |

NORMALIZED DIAGONAL:

|   |              |   |              |   |              |   |              |   |              |   |              |
|---|--------------|---|--------------|---|--------------|---|--------------|---|--------------|---|--------------|
| 1 | 1.00000E+000 | 2 | 8.37657E-001 | 3 | 3.14849E-001 | 4 | 1.00222E-001 | 5 | 1.20894E-001 | 6 | 4.08107E-003 |
| 7 | 1.62530E-001 | 8 | 9.99330E-001 |   |              |   |              |   |              |   |              |

MARQUARDT PARAMETER = 0, TRUST EXPANSION = 1.00

NEW PARAMETER (EST. ERROR) -- CHANGE THIS ITERATION

|   |       |          |                |           |
|---|-------|----------|----------------|-----------|
| 1 | 10000 | A        | 964.962(133)   | 0.000     |
| 2 | 20000 | B        | 739.7062(288)  | 0.0000    |
| 3 | 30000 | C        | 513.243( 43)   | 0.000     |
| 4 | 200   | -DeltaJ  | 1.23(125)E-03  | -0.00E-03 |
| 5 | 2000  | -DeltaK  | 7.0( 40)E-03   | -0.0E-03  |
| 6 | 1100  | -DeltaJK | -7.4( 51)E-03  | 0.0E-03   |
| 7 | 40100 | -deltaJ  | -0.98( 70)E-03 | 0.00E-03  |
| 8 | 41000 | -deltaK  | 7.3( 57)E-03   | -0.0E-03  |

MICROWAVE AVG = -0.000011 MHz, IR AVG = 0.00000

MICROWAVE RMS = 0.021592 MHz, IR RMS = 0.00000

### D4\_wwuud SPFIT Output

EXP.FREQ. - CALC.FREQ. - DIFF. - EXP.ERR.- EST.ERR.-AVG. CALC.FREQ. - DIFF. - WT.

|                     |             |             |          |         |         |             |          |        |  |
|---------------------|-------------|-------------|----------|---------|---------|-------------|----------|--------|--|
| 1: 7 1 6 6 0 6      | 11872.92000 | 11872.93144 | -0.01144 | 0.10000 | 0.09984 |             |          |        |  |
| 2: 7 2 6 6 1 6      | 11888.27000 | 11888.25873 | 0.01127  | 0.10000 | 0.09996 |             |          |        |  |
| 3: 8 6 3 7 5 3      | 14584.00000 | 14583.99985 | 0.00015  | 0.10000 | 0.10000 |             |          |        |  |
| 4: 9 3 6 8 2 6      | 14833.87000 | 14833.86902 | 0.00098  | 0.10000 | 0.09999 |             |          |        |  |
| 5: 10 1 9 9 1 8     | 10494.12000 | 10493.93987 | 0.18013  | 0.10000 | 0.07110 |             |          |        |  |
| 6: 10 2 8 9 3 7     | 11262.51000 | 11262.51681 | -0.00681 | 0.10000 | 0.09986 |             |          |        |  |
| 7: 10 2 9 9 1 8     | 10494.12000 | 10494.30139 | -0.18139 | 0.10000 | 0.07067 |             |          |        |  |
| 8: 12 1 11 11 2 10  | 12355.83000 | 12355.81100 | 0.01900  | 0.10000 | 0.10036 | 12355.82285 | 0.00715  | 0.5000 |  |
| 9: 12 2 11 11 2 10  | 12355.83000 | 12355.83471 | -0.00471 | 0.10000 | 0.10036 | 12355.82285 | 0.00715  | 0.5000 |  |
| 10: 19 0 19 18 1 18 | 18092.02000 | 18092.02072 | -0.00072 | 0.10000 | 0.09992 | 18092.02072 | -0.00072 | 0.5000 |  |
| 11: 19 1 19 18 1 18 | 18092.02000 | 18092.02072 | -0.00072 | 0.10000 | 0.09992 | 18092.02072 | -0.00072 | 0.5000 |  |

NORMALIZED DIAGONAL:

|   |              |   |              |   |              |   |              |   |              |   |              |
|---|--------------|---|--------------|---|--------------|---|--------------|---|--------------|---|--------------|
| 1 | 1.00000E+000 | 2 | 1.05371E-001 | 3 | 2.73420E-001 | 4 | 2.76957E-003 | 5 | 9.98288E-001 | 6 | 2.05202E-004 |
| 7 | 9.46740E-001 | 8 | 5.76492E-001 |   |              |   |              |   |              |   |              |

MARQUARDT PARAMETER = 0, TRUST EXPANSION = 1.00

NEW PARAMETER (EST. ERROR) -- CHANGE THIS ITERATION

|   |       |          |               |          |
|---|-------|----------|---------------|----------|
| 1 | 10000 | A        | 1045.20( 47)  | -0.00    |
| 2 | 20000 | B        | 727.431(175)  | 0.000    |
| 3 | 30000 | C        | 466.294( 43)  | -0.000   |
| 4 | 200   | -DeltaJ  | -7.0( 37)E-03 | -0.0E-03 |
| 5 | 2000  | -DeltaK  | -0.0221(143)  | -0.0000  |
| 6 | 1100  | -DeltaJK | 0.0285(178)   | 0.0000   |
| 7 | 40100 | -deltaJ  | 4.12(236)E-03 | 0.00E-03 |
| 8 | 41000 | -deltaK  | -0.0245(155)  | -0.0000  |

MICROWAVE AVG = -0.000076 MHz, IR AVG = 0.00000

MICROWAVE RMS = 0.085443 MHz, IR RMS = 0.00000



### D4\_wuwuu SPFIT Output

EXP.FREQ. - CALC.FREQ. - DIFF. - EXP.ERR.- EST.ERR.-AVG. CALC.FREQ. - DIFF. - WT.

|     |                 |             |             |          |         |         |             |         |        |  |  |  |  |  |
|-----|-----------------|-------------|-------------|----------|---------|---------|-------------|---------|--------|--|--|--|--|--|
| 1:  | 7 2 6 6 1 6     | 11376.50000 | 11376.49687 | 0.00313  | 0.10000 | 0.10000 |             |         |        |  |  |  |  |  |
| 2:  | 9 6 4 8 5 4     | 15855.49000 | 15855.49275 | -0.00275 | 0.10000 | 0.10000 |             |         |        |  |  |  |  |  |
| 3:  | 12 3 10 11 3 9  | 12795.59000 | 12795.47051 | 0.11949  | 0.10000 | 0.08761 |             |         |        |  |  |  |  |  |
| 4:  | 13 4 10 12 4 9  | 14433.87000 | 14433.94520 | -0.07520 | 0.10000 | 0.09553 |             |         |        |  |  |  |  |  |
| 5:  | 14 3 12 13 2 11 | 14625.11000 | 14625.25173 | -0.14173 | 0.10000 | 0.08420 |             |         |        |  |  |  |  |  |
| 6:  | 16 3 13 15 4 12 | 17180.91000 | 17180.79227 | 0.11773  | 0.10000 | 0.09279 |             |         |        |  |  |  |  |  |
| 7:  | 16 4 13 15 3 12 | 17196.79000 | 17196.71326 | 0.07674  | 0.10000 | 0.09269 |             |         |        |  |  |  |  |  |
| 8:  | 17 3 14 16 3 13 | 18097.03000 | 18096.94928 | 0.08072  | 0.10000 | 0.06703 |             |         |        |  |  |  |  |  |
| 9:  | 17 4 14 16 4 13 | 18094.00000 | 18094.18842 | -0.18842 | 0.10000 | 0.06656 |             |         |        |  |  |  |  |  |
| 10: | 18 1 17 17 1 16 | 17527.66000 | 17527.64577 | 0.01423  | 0.10000 | 0.10033 | 17527.64597 | 0.01403 | 0.5000 |  |  |  |  |  |
| 11: | 18 2 17 17 1 16 | 17527.66000 | 17527.64617 | 0.01383  | 0.10000 | 0.10033 | 17527.64597 | 0.01403 | 0.5000 |  |  |  |  |  |

NORMALIZED DIAGONAL:

|   |              |   |              |   |              |   |              |   |              |   |              |
|---|--------------|---|--------------|---|--------------|---|--------------|---|--------------|---|--------------|
| 1 | 1.00000E+000 | 2 | 6.14682E-001 | 3 | 1.76946E-001 | 4 | 2.68423E-003 | 5 | 9.38945E-001 | 6 | 9.54786E-005 |
| 7 | 4.23325E-001 | 8 | 5.74557E-002 |   |              |   |              |   |              |   |              |

MARQUARDT PARAMETER = 0, TRUST EXPANSION = 1.00

NEW PARAMETER (EST. ERROR) -- CHANGE THIS ITERATION

|   |       |          |              |         |
|---|-------|----------|--------------|---------|
| 1 | 10000 | A        | 1068.31(184) | -0.01   |
| 2 | 20000 | B        | 673.87( 55)  | 0.00    |
| 3 | 30000 | C        | 457.357( 41) | 0.000   |
| 4 | 200   | -DeltaJ  | 0.0344(113)  | 0.0000  |
| 5 | 2000  | -DeltaK  | 0.0505(206)  | 0.0001  |
| 6 | 1100  | -DeltaJK | -0.086( 32)  | -0.000  |
| 7 | 40100 | -deltaJ  | -0.0232( 72) | -0.0000 |
| 8 | 41000 | -deltaK  | 0.0386(168)  | 0.0001  |

MICROWAVE AVG = 0.000374 MHz, IR AVG = 0.00000

MICROWAVE RMS = 0.100996 MHz, IR RMS = 0.00000

### D4\_wuwdu SPFIT Output

EXP.FREQ. - CALC.FREQ. - DIFF. - EXP.ERR.- EST.ERR.-AVG. CALC.FREQ. - DIFF. - WT.

|    |    |   |    |    |   |    |             |             |          |         |         |
|----|----|---|----|----|---|----|-------------|-------------|----------|---------|---------|
| 1: | 11 | 4 | 8  | 10 | 3 | 8  | 17354.08000 | 17354.06345 | 0.01655  | 0.10000 | 0.09997 |
| 2: | 13 | 2 | 12 | 12 | 1 | 11 | 12947.63000 | 12947.03373 | 0.59627  | 0.10000 | 0.05774 |
| 3: | 14 | 1 | 14 | 13 | 0 | 13 | 13149.78000 | 13149.92107 | -0.14107 | 0.10000 | 0.09813 |
| 4: | 15 | 2 | 13 | 14 | 3 | 12 | 15486.79000 | 15487.18724 | -0.39724 | 0.10000 | 0.08385 |

NORMALIZED DIAGONAL:

1 1.00000E+000 2 3.00086E-002 3 9.82319E-001

MARQUARDT PARAMETER = 0, TRUST EXPANSION = 1.00

NEW PARAMETER (EST. ERROR) -- CHANGE THIS ITERATION

|   |       |   |               |         |
|---|-------|---|---------------|---------|
| 1 | 10000 | A | 1083.57( 61)  | 0.00    |
| 2 | 20000 | B | 656.876(160)  | -0.000  |
| 3 | 30000 | C | 456.9931( 46) | -0.0000 |

MICROWAVE AVG = 0.018629 MHz, IR AVG = 0.00000

MICROWAVE RMS = 0.365210 MHz, IR RMS = 0.00000

### D4\_wuwud SPFIT Output

EXP.FREQ. - CALC.FREQ. - DIFF. - EXP.ERR.- EST.ERR.-AVG. CALC.FREQ. - DIFF. - WT.

|    |                 |             |             |          |         |         |
|----|-----------------|-------------|-------------|----------|---------|---------|
| 1: | 9 2 7 8 1 7     | 13902.63000 | 13902.25653 | 0.37347  | 0.10000 | 0.08355 |
| 2: | 10 4 7 9 3 7    | 15719.56000 | 15719.97422 | -0.41422 | 0.10000 | 0.08123 |
| 3: | 13 3 11 12 2 10 | 13566.34000 | 13565.71795 | 0.62205  | 0.10000 | 0.05899 |
| 4: | 13 4 10 12 3 9  | 14576.25000 | 14575.97043 | 0.27957  | 0.10000 | 0.08521 |
| 5: | 15 2 13 14 2 12 | 15347.45000 | 15348.17941 | -0.72941 | 0.10000 | 0.07545 |

NORMALIZED DIAGONAL:

1 1.00000E+000 2 6.61543E-001 3 8.66810E-001

MARQUARDT PARAMETER = 0, TRUST EXPANSION = 1.00

NEW PARAMETER (EST. ERROR) -- CHANGE THIS ITERATION

|   |       |   |                |         |
|---|-------|---|----------------|---------|
| 1 | 10000 | A | 1092.6220(217) | -0.0000 |
| 2 | 20000 | B | 646.5223( 54)  | 0.0000  |
| 3 | 30000 | C | 452.4241( 34)  | -0.0000 |

MICROWAVE AVG = 0.026292 MHz, IR AVG = 0.00000

MICROWAVE RMS = 0.511508 MHz, IR RMS = 0.00000

### D4\_wwuwd SPFIT Output

EXP.FREQ. - CALC.FREQ. - DIFF. - EXP.ERR.- EST.ERR.-AVG. CALC.FREQ. - DIFF. - WT.

|    |                 |             |             |          |         |         |
|----|-----------------|-------------|-------------|----------|---------|---------|
| 1: | 5 4 2 4 3 2     | 13622.12000 | 13622.12006 | -0.00006 | 0.10000 | 0.10000 |
| 2: | 7 3 5 6 2 5     | 14741.29000 | 14741.29754 | -0.00754 | 0.10000 | 0.09975 |
| 3: | 9 2 8 8 2 7     | 11235.09000 | 11235.07411 | 0.01589  | 0.10000 | 0.09888 |
| 4: | 9 3 7 8 2 7     | 18073.97000 | 18073.96185 | 0.00815  | 0.10000 | 0.09971 |
| 5: | 10 110 9 0 9    | 11498.95000 | 11498.94818 | 0.00182  | 0.10000 | 0.09999 |
| 6: | 11 2 9 10 3 8   | 13131.24000 | 13131.28710 | -0.04710 | 0.10000 | 0.08965 |
| 7: | 12 3 10 11 2 9  | 16548.29000 | 16548.33788 | -0.04788 | 0.10000 | 0.08928 |
| 8: | 12 3 10 11 3 9  | 15434.38000 | 15434.30002 | 0.07998  | 0.10000 | 0.06587 |
| 9: | 14 2 13 13 2 12 | 16835.51000 | 16835.51348 | -0.00348 | 0.10000 | 0.09995 |

NORMALIZED DIAGONAL:

|   |              |   |              |   |              |   |              |   |              |   |              |
|---|--------------|---|--------------|---|--------------|---|--------------|---|--------------|---|--------------|
| 1 | 1.00000E+000 | 2 | 1.50716E-001 | 3 | 8.76886E-001 | 4 | 3.83819E-002 | 5 | 3.35732E-001 | 6 | 1.09222E-003 |
| 7 | 9.96737E-001 | 8 | 2.57714E-001 |   |              |   |              |   |              |   |              |

MARQUARDT PARAMETER = 0, TRUST EXPANSION = 1.00

NEW PARAMETER (EST. ERROR) -- CHANGE THIS ITERATION

|   |       |          |                |           |
|---|-------|----------|----------------|-----------|
| 1 | 10000 | A        | 1664.241(155)  | -0.000    |
| 2 | 20000 | B        | 750.043( 40)   | 0.000     |
| 3 | 30000 | C        | 550.7996( 90)  | 0.0000    |
| 4 | 200   | -DeltaJ  | 4.09(276)E-03  | 0.00E-03  |
| 5 | 2000  | -DeltaK  | 5.0( 51)E-03   | 0.0E-03   |
| 6 | 1100  | -DeltaJK | -9.2( 78)E-03  | -0.0E-03  |
| 7 | 40100 | -deltaJ  | -1.60(150)E-03 | -0.00E-03 |
| 8 | 41000 | -deltaK  | 1.1( 32)E-03   | 0.0E-03   |

MICROWAVE AVG = -0.000023 MHz, IR AVG = 0.00000

MICROWAVE RMS = 0.035434 MHz, IR RMS = 0.00000

### D4\_wwwud SPFIT Output

EXP.FREQ. - CALC.FREQ. - DIFF. - EXP.ERR.- EST.ERR.-AVG. CALC.FREQ. - DIFF. - WT.

|     |                 |             |             |          |         |         |             |         |        |  |
|-----|-----------------|-------------|-------------|----------|---------|---------|-------------|---------|--------|--|
| 1:  | 5 1 4 4 0 4     | 10900.36000 | 10900.39500 | -0.03500 | 0.10000 | 0.09448 |             |         |        |  |
| 2:  | 6 4 3 5 3 3     | 13074.53000 | 13074.44476 | 0.08524  | 0.10000 | 0.06023 |             |         |        |  |
| 3:  | 7 3 4 6 4 3     | 11953.61000 | 11953.64074 | -0.03074 | 0.10000 | 0.09580 |             |         |        |  |
| 4:  | 8 3 5 7 2 5     | 17433.97000 | 17434.01090 | -0.04090 | 0.10000 | 0.09234 |             |         |        |  |
| 5:  | 8 3 5 7 4 4     | 13193.78000 | 13193.72226 | 0.05774  | 0.10000 | 0.09930 | 13193.76824 | 0.01176 | 0.5000 |  |
| 6:  | 8 4 5 7 4 4     | 13193.78000 | 13193.81421 | -0.03421 | 0.10000 | 0.09930 | 13193.76824 | 0.01176 | 0.5000 |  |
| 7:  | 8 8 0 7 7 0     | 17682.83000 | 17682.83084 | -0.00084 | 0.10000 | 0.09999 |             |         |        |  |
| 8:  | 10 3 7 9 3 6    | 15663.20000 | 15663.18790 | 0.01210  | 0.10000 | 0.09928 | 15663.18814 | 0.01186 | 0.5000 |  |
| 9:  | 10 4 7 9 3 6    | 15663.20000 | 15663.18838 | 0.01162  | 0.10000 | 0.09928 | 15663.18814 | 0.01186 | 0.5000 |  |
| 10: | 15 5 11 15 3 12 | 10856.23000 | 10856.22655 | 0.00345  | 0.10000 | 0.10002 | 10856.22655 | 0.00345 | 0.5000 |  |
| 11: | 15 5 11 15 4 12 | 10856.23000 | 10856.22655 | 0.00345  | 0.10000 | 0.10002 | 10856.22655 | 0.00345 | 0.5000 |  |
| 12: | 18 8 11 18 7 12 | 10842.81000 | 10842.81152 | -0.00152 | 0.10000 | 0.10057 |             |         |        |  |

NORMALIZED DIAGONAL:

|   |              |   |              |   |              |   |              |   |              |   |              |
|---|--------------|---|--------------|---|--------------|---|--------------|---|--------------|---|--------------|
| 1 | 1.00000E+000 | 2 | 1.12460E-002 | 3 | 1.56334E-001 | 4 | 8.13395E-001 | 5 | 2.84001E-001 | 6 | 4.86962E-003 |
| 7 | 9.97725E-001 | 8 | 4.70601E-001 |   |              |   |              |   |              |   |              |

MARQUARDT PARAMETER = 0, TRUST EXPANSION = 1.00

NEW PARAMETER (EST. ERROR) -- CHANGE THIS ITERATION

|   |       |          |                 |           |
|---|-------|----------|-----------------|-----------|
| 1 | 10000 | A        | 1112.59( 78)    | 0.00      |
| 2 | 20000 | B        | 1068.93( 68)    | -0.00     |
| 3 | 30000 | C        | 617.9649(246)   | 0.0000    |
| 4 | 200   | -DeltaJ  | -1.059(308)E-03 | 0.000E-03 |
| 5 | 2000  | -DeltaK  | -9.66(170)E-03  | 0.00E-03  |
| 6 | 1100  | -DeltaJK | 0.01032(207)    | -0.00000  |
| 7 | 40100 | -deltaJ  | -0.0165( 35)    | 0.0000    |
| 8 | 41000 | -deltaK  | -0.0659( 93)    | 0.0000    |

MICROWAVE AVG = 0.000368 MHz, IR AVG = 0.00000

MICROWAVE RMS = 0.035594 MHz, IR RMS = 0.00000

### D4\_wwdwd SPFIT Output

|    | EXP.FREQ. | - | CALC.FREQ. | -  | DIFF. | -  | EXP.ERR.    | -           | EST.ERR. | -       | AVG.    | CALC.FREQ. | - | DIFF. | - | WT. |
|----|-----------|---|------------|----|-------|----|-------------|-------------|----------|---------|---------|------------|---|-------|---|-----|
| 1: | 9         | 2 | 8          | 8  | 1     | 8  | 18080.84000 | 18080.84041 | -0.00041 | 0.10000 | 0.10000 |            |   |       |   |     |
| 2: | 10        | 0 | 10         | 9  | 1     | 9  | 11865.03000 | 11864.97617 | 0.05383  | 0.10000 | 0.07198 |            |   |       |   |     |
| 3: | 10        | 1 | 10         | 9  | 0     | 9  | 11872.92000 | 11872.97579 | -0.05579 | 0.10000 | 0.06946 |            |   |       |   |     |
| 4: | 13        | 3 | 11         | 12 | 2     | 10 | 17374.42000 | 17374.41821 | 0.00179  | 0.10000 | 0.09997 |            |   |       |   |     |

NORMALIZED DIAGONAL:

1 1.00000E+000 2 4.38800E-001 3 9.54873E-001

MARQUARDT PARAMETER = 0, TRUST EXPANSION = 1.00

NEW PARAMETER (EST. ERROR) -- CHANGE THIS ITERATION

|   |       |   |               |         |
|---|-------|---|---------------|---------|
| 1 | 10000 | A | 1540.465( 52) | -0.000  |
| 2 | 20000 | B | 780.6484(114) | 0.0000  |
| 3 | 30000 | C | 570.8311( 38) | -0.0000 |

MICROWAVE AVG = -0.000144 MHz, IR AVG = 0.00000

MICROWAVE RMS = 0.038774 MHz, IR RMS = 0.00000

### D4\_wwvdd SPFIT Output

|                 | EXP.FREQ.   | - CALC.FREQ. | - DIFF.  | - EXP.ERR. | - EST.ERR. | -AVG. CALC.FREQ. | - DIFF. | - WT. |
|-----------------|-------------|--------------|----------|------------|------------|------------------|---------|-------|
| 1: 7 6 1 6 5 1  | 15490.73000 | 15490.61214  | 0.11786  | 0.10000    | 0.06934    |                  |         |       |
| 2: 8 3 6 7 2 6  | 17683.89000 | 17684.00244  | -0.11244 | 0.10000    | 0.07385    |                  |         |       |
| 3: 10 5 5 9 6 4 | 17393.62000 | 17393.61102  | 0.00898  | 0.10000    | 0.05832    |                  |         |       |
| 4: 10 5 6 9 4 5 | 16437.25000 | 16437.27515  | -0.02515 | 0.10000    | 0.08270    |                  |         |       |
| 5: 10 6 4 9 7 3 | 17774.87000 | 17774.84638  | 0.02362  | 0.10000    | 0.09746    |                  |         |       |

NORMALIZED DIAGONAL:

1 1.00000E+000 2 7.57617E-001 3 9.91303E-001

MARQUARDT PARAMETER = 0, TRUST EXPANSION = 1.00

NEW PARAMETER (EST. ERROR) -- CHANGE THIS ITERATION

|   |       |   |                |         |
|---|-------|---|----------------|---------|
| 1 | 10000 | A | 1169.3579( 67) | 0.0000  |
| 2 | 20000 | B | 1050.6906( 44) | -0.0000 |
| 3 | 30000 | C | 586.4166( 88)  | 0.0000  |

MICROWAVE AVG = 0.002574 MHz, IR AVG = 0.00000

MICROWAVE RMS = 0.074572 MHz, IR RMS = 0.00000

### D4\_wwdww SPFIT Output

|                    | EXP.FREQ.   | - CALC.FREQ. | - DIFF.  | - EXP.ERR. | - EST.ERR. | -AVG. CALC.FREQ. | - DIFF. | - WT. |
|--------------------|-------------|--------------|----------|------------|------------|------------------|---------|-------|
| 1: 6 1 5 5 0 5     | 11162.50000 | 11162.37368  | 0.12632  | 0.10000    | 0.08601    |                  |         |       |
| 2: 7 3 5 6 2 5     | 14651.32000 | 14651.36764  | -0.04764 | 0.10000    | 0.09813    |                  |         |       |
| 3: 12 1 12 11 1 11 | 13605.03000 | 13604.88834  | 0.14166  | 0.10000    | 0.08202    |                  |         |       |
| 4: 14 2 12 13 3 11 | 17393.62000 | 17393.77174  | -0.15174 | 0.10000    | 0.07902    |                  |         |       |

NORMALIZED DIAGONAL:

1 1.00000E+000 2 8.39711E-001 3 9.98053E-001

MARQUARDT PARAMETER = 0, TRUST EXPANSION = 1.00

NEW PARAMETER (EST. ERROR) -- CHANGE THIS ITERATION

|   |       |   |                |         |
|---|-------|---|----------------|---------|
| 1 | 10000 | A | 1653.2342(247) | -0.0000 |
| 2 | 20000 | B | 746.0877( 51)  | 0.0000  |
| 3 | 30000 | C | 547.3222( 36)  | -0.0000 |

MICROWAVE AVG = 0.017151 MHz, IR AVG = 0.00000

MICROWAVE RMS = 0.123813 MHz, IR RMS = 0.00000



### D4\_wwuwu SPFIT Output

EXP.FREQ. - CALC.FREQ. - DIFF. - EXP.ERR.- EST.ERR.-AVG. CALC.FREQ. - DIFF. - WT.

|                   |             |             |          |         |         |
|-------------------|-------------|-------------|----------|---------|---------|
| 1: 6 3 4 5 2 4    | 12891.14000 | 12891.15058 | -0.01058 | 0.10000 | 0.09999 |
| 2: 10 2 9 9 1 8   | 12718.20000 | 12718.02126 | 0.17874  | 0.10000 | 0.09755 |
| 3: 10 3 8 9 3 7   | 13189.64000 | 13189.11694 | 0.52306  | 0.10000 | 0.07580 |
| 4: 12 3 10 11 3 9 | 15590.68000 | 15591.25943 | -0.57943 | 0.10000 | 0.06904 |

NORMALIZED DIAGONAL:

1 1.00000E+000 2 6.24299E-001 3 9.42117E-001

MARQUARDT PARAMETER = 0, TRUST EXPANSION = 1.00

NEW PARAMETER (EST. ERROR) -- CHANGE THIS ITERATION

|   |       |   |                |         |
|---|-------|---|----------------|---------|
| 1 | 10000 | A | 1579.4473(261) | -0.0000 |
| 2 | 20000 | B | 763.2353(126)  | 0.0000  |
| 3 | 30000 | C | 557.7811( 49)  | -0.0000 |

MICROWAVE AVG = 0.027947 MHz, IR AVG = 0.00000

MICROWAVE RMS = 0.400436 MHz, IR RMS = 0.00000

### D4\_wwwwd SPFIT Output

|                    | EXP.FREQ.   | - CALC.FREQ. | - DIFF.  | - EXP.ERR. | - EST.ERR. | -AVG. CALC.FREQ. | - DIFF. | - WT. |
|--------------------|-------------|--------------|----------|------------|------------|------------------|---------|-------|
| 1: 3 3 1 2 2 1     | 10561.49000 | 10561.45656  | 0.03344  | 0.10000    | 0.09821    |                  |         |       |
| 2: 6 1 5 5 2 4     | 10442.81000 | 10442.68505  | 0.12495  | 0.10000    | 0.07100    |                  |         |       |
| 3: 7 3 5 6 3 4     | 13309.46000 | 13309.58143  | -0.12143 | 0.10000    | 0.07291    |                  |         |       |
| 4: 16 4 13 16 2 14 | 17176.64000 | 17176.64243  | -0.00243 | 0.10000    | 0.09999    |                  |         |       |

NORMALIZED DIAGONAL:

1 1.00000E+000 2 7.00067E-001 3 5.35856E-001

MARQUARDT PARAMETER = 0, TRUST EXPANSION = 1.00

NEW PARAMETER (EST. ERROR) -- CHANGE THIS ITERATION

|   |       |   |                |         |
|---|-------|---|----------------|---------|
| 1 | 10000 | A | 1911.5654(200) | 0.0000  |
| 2 | 20000 | B | 1134.5525( 63) | -0.0000 |
| 3 | 30000 | C | 747.9365( 55)  | 0.0000  |

MICROWAVE AVG = 0.008631 MHz, IR AVG = 0.00000

MICROWAVE RMS = 0.088713 MHz, IR RMS = 0.00000

### D4\_wwwwd' SPFIT Output

|                    | EXP.FREQ.   | - CALC.FREQ. | - DIFF.  | - EXP.ERR. | - EST.ERR. | -AVG. CALC.FREQ. | - DIFF. | - WT. |
|--------------------|-------------|--------------|----------|------------|------------|------------------|---------|-------|
| 1: 4 3 2 3 2 2     | 12455.04000 | 12454.99132  | 0.04868  | 0.10000    | 0.09867    |                  |         |       |
| 2: 7 2 5 6 3 4     | 12355.84000 | 12355.86782  | -0.02782 | 0.10000    | 0.09957    |                  |         |       |
| 3: 12 2 10 12 1 11 | 13164.88000 | 13165.09418  | -0.21418 | 0.10000    | 0.06979    |                  |         |       |
| 4: 13 3 10 13 2 11 | 12718.21000 | 12718.00894  | 0.20106  | 0.10000    | 0.07403    |                  |         |       |

NORMALIZED DIAGONAL:

1 1.00000E+000 2 8.83191E-001 3 3.72474E-001

MARQUARDT PARAMETER = 0, TRUST EXPANSION = 1.00

NEW PARAMETER (EST. ERROR) -- CHANGE THIS ITERATION

|   |       |   |                |        |
|---|-------|---|----------------|--------|
| 1 | 10000 | A | 1864.6016(183) | 0.0000 |
| 2 | 20000 | B | 1154.0660( 62) | 0.0000 |
| 3 | 30000 | C | 766.6754( 74)  | 0.0000 |

MICROWAVE AVG = 0.001936 MHz, IR AVG = 0.00000

MICROWAVE RMS = 0.149537 MHz, IR RMS = 0.00000

### D4\_wwwu SPFIT Output

|                | EXP.FREQ.   | - CALC.FREQ. | - DIFF.  | - EXP.ERR. | - EST.ERR. | -AVG. CALC.FREQ. | - DIFF. | - WT. |
|----------------|-------------|--------------|----------|------------|------------|------------------|---------|-------|
| 1: 4 1 3 3 0 3 | 10442.81000 | 10442.91486  | -0.10486 | 0.10000    | 0.09505    |                  |         |       |
| 2: 4 4 0 3 3 0 | 14550.84000 | 14550.77842  | 0.06158  | 0.10000    | 0.09832    |                  |         |       |
| 3: 7 1 6 6 1 5 | 12449.21000 | 12449.41991  | -0.20991 | 0.10000    | 0.07831    |                  |         |       |
| 4: 7 1 6 6 2 5 | 11985.73000 | 11985.49526  | 0.23474  | 0.10000    | 0.07187    |                  |         |       |

NORMALIZED DIAGONAL:

1 1.00000E+000 2 9.20356E-001 3 9.93595E-001

MARQUARDT PARAMETER = 0, TRUST EXPANSION = 1.00

NEW PARAMETER (EST. ERROR) -- CHANGE THIS ITERATION

|   |       |   |                |         |
|---|-------|---|----------------|---------|
| 1 | 10000 | A | 1945.6061(142) | 0.0000  |
| 2 | 20000 | B | 1113.5160(102) | -0.0000 |
| 3 | 30000 | C | 732.6576( 77)  | 0.0000  |

MICROWAVE AVG = -0.004613 MHz, IR AVG = 0.00000

MICROWAVE RMS = 0.168786 MHz, IR RMS = 0.00000

### D2O\_wdudu SPFIT Output

EXP.FREQ. - CALC.FREQ. - DIFF. - EXP.ERR.- EST.ERR.-AVG. CALC.FREQ. - DIFF. - WT.

|     |                 |             |             |          |         |         |             |          |        |
|-----|-----------------|-------------|-------------|----------|---------|---------|-------------|----------|--------|
| 1:  | 7 4 4 6 3 4     | 10701.77000 | 10701.76973 | 0.00027  | 0.10000 | 0.00000 |             |          |        |
| 2:  | 7 4 4 6 3 4     | 10701.77000 | 10701.76973 | 0.00027  | 0.10000 | 0.00000 |             |          |        |
| 3:  | 8 6 3 7 5 3     | 12705.98000 | 12705.99022 | -0.01022 | 0.10000 | 0.00000 |             |          |        |
| 4:  | 9 6 4 8 5 4     | 13952.61000 | 13952.58894 | 0.02106  | 0.10000 | 0.00000 |             |          |        |
| 5:  | 9 8 2 8 7 2     | 15025.84000 | 15025.84027 | -0.00027 | 0.10000 | 0.00000 |             |          |        |
| 6:  | 10 6 5 9 5 5    | 15262.50000 | 15262.51275 | -0.01275 | 0.10000 | 0.00000 |             |          |        |
| 7:  | 11 1 10 10 1 9  | 11128.03000 | 11127.98108 | 0.04892  | 0.10000 | 0.00000 | 11127.98555 | 0.04445  | 0.5000 |
| 8:  | 11 2 10 10 1 9  | 11128.03000 | 11127.99001 | 0.03999  | 0.10000 | 0.00000 | 11127.98555 | 0.04445  | 0.5000 |
| 9:  | 14 0 14 13 0 13 | 13306.15000 | 13306.15252 | -0.00252 | 0.10000 | 0.00000 | 13306.15252 | -0.00252 | 0.5000 |
| 10: | 14 1 14 13 0 13 | 13306.15000 | 13306.15252 | -0.00252 | 0.10000 | 0.00000 | 13306.15252 | -0.00252 | 0.5000 |
| 11: | 14 1 13 13 1 12 | 13912.51000 | 13912.56045 | -0.05045 | 0.10000 | 0.00000 | 13912.56048 | -0.05048 | 0.5000 |
| 12: | 14 2 13 13 1 12 | 13912.51000 | 13912.56052 | -0.05052 | 0.10000 | 0.00000 | 13912.56048 | -0.05048 | 0.5000 |
| 13: | 17 3 14 16 3 13 | 17912.49000 | 17912.48163 | 0.00837  | 0.10000 | 0.00000 | 17912.48259 | 0.00741  | 0.5000 |
| 14: | 17 4 14 16 3 13 | 17912.49000 | 17912.48354 | 0.00646  | 0.10000 | 0.00000 | 17912.48259 | 0.00741  | 0.5000 |
| 15: | 19 0 19 18 0 18 | 17945.32000 | 17945.31235 | 0.00765  | 0.10000 | 0.00000 | 17945.31235 | 0.00765  | 0.5000 |
| 16: | 19 1 19 18 0 18 | 17945.32000 | 17945.31235 | 0.00765  | 0.10000 | 0.00000 | 17945.31235 | 0.00765  | 0.5000 |

NORMALIZED DIAGONAL:

|   |              |   |              |   |              |   |              |   |              |   |              |
|---|--------------|---|--------------|---|--------------|---|--------------|---|--------------|---|--------------|
| 1 | 1.00000E+000 | 2 | 2.23809E-001 | 3 | 2.81865E-001 | 4 | 3.34117E-002 | 5 | 9.97202E-001 | 6 | 1.44996E-003 |
| 7 | 8.83935E-001 | 8 | 5.65206E-001 |   |              |   |              |   |              |   |              |

MARQUARDT PARAMETER = 0, TRUST EXPANSION = 1.00

NEW PARAMETER (EST. ERROR) -- CHANGE THIS ITERATION

|   |       |          |                 |           |
|---|-------|----------|-----------------|-----------|
| 1 | 10000 | A        | 882.460(100)    | 0.000     |
| 2 | 20000 | B        | 684.232( 68)    | -0.000    |
| 3 | 30000 | C        | 464.5505( 75)   | 0.0000    |
| 4 | 200   | -DeltaJ  | 1.462(309)E-03  | 0.000E-03 |
| 5 | 2000  | -DeltaK  | 4.84(179)E-03   | 0.00E-03  |
| 6 | 1100  | -DeltaJK | -6.68(209)E-03  | -0.00E-03 |
| 7 | 40100 | -deltaJ  | -1.813(309)E-03 | 0.000E-03 |
| 8 | 41000 | -deltaK  | 6.64(197)E-03   | 0.00E-03  |

MICROWAVE AVG = 0.000443 MHz, IR AVG = 0.00000

MICROWAVE RMS = 0.022065 MHz, IR RMS = 0.00000

## D2O\_wuduu SPFIT Output

EXP.FREQ. - CALC.FREQ. - DIFF. - EXP.ERR.- EST.ERR.-AVG. CALC.FREQ. - DIFF. - WT.

|                     |             |             |          |         |         |             |          |        |  |
|---------------------|-------------|-------------|----------|---------|---------|-------------|----------|--------|--|
| 1: 7 6 2 6 5 2      | 11601.34000 | 11601.35505 | -0.01505 | 0.10000 | 0.06431 |             |          |        |  |
| 2: 7 6 2 6 5 2      | 11601.34000 | 11601.35505 | -0.01505 | 0.10000 | 0.06431 |             |          |        |  |
| 3: 7 7 1 6 6 1      | 12194.86000 | 12194.85713 | 0.00287  | 0.10000 | 0.09993 |             |          |        |  |
| 4: 8 5 4 7 4 4      | 12387.75000 | 12387.75328 | -0.00328 | 0.10000 | 0.09967 |             |          |        |  |
| 5: 8 7 2 7 6 2      | 13380.26000 | 13380.21729 | 0.04271  | 0.10000 | 0.05405 |             |          |        |  |
| 6: 9 8 2 8 7 2      | 15162.50000 | 15162.51739 | -0.01739 | 0.10000 | 0.09414 |             |          |        |  |
| 7: 11 0 11 10 0 10  | 10287.48000 | 10287.48634 | -0.00634 | 0.10000 | 0.09965 | 10287.48639 | -0.00639 | 0.5000 |  |
| 8: 11 1 11 10 0 10  | 10287.48000 | 10287.48643 | -0.00643 | 0.10000 | 0.09965 | 10287.48639 | -0.00639 | 0.5000 |  |
| 9: 14 2 12 13 2 11  | 14289.15000 | 14289.09977 | 0.05023  | 0.10000 | 0.06426 | 14289.10204 | 0.04796  | 0.5000 |  |
| 10: 14 3 12 13 2 11 | 14289.15000 | 14289.10431 | 0.04569  | 0.10000 | 0.06426 | 14289.10204 | 0.04796  | 0.5000 |  |
| 11: 15 1 14 14 1 13 | 14550.83000 | 14550.86443 | -0.03443 | 0.10000 | 0.08006 | 14550.86443 | -0.03443 | 0.5000 |  |
| 12: 15 2 14 14 1 13 | 14550.83000 | 14550.86444 | -0.03444 | 0.10000 | 0.08006 | 14550.86443 | -0.03443 | 0.5000 |  |
| 13: 17 3 14 16 3 13 | 17650.81000 | 17650.82052 | -0.01052 | 0.10000 | 0.09857 | 17650.82148 | -0.01148 | 0.5000 |  |
| 14: 17 4 14 16 3 13 | 17650.81000 | 17650.82245 | -0.01245 | 0.10000 | 0.09857 | 17650.82148 | -0.01148 | 0.5000 |  |
| 15: 19 0 19 18 0 18 | 17530.50000 | 17530.49251 | 0.00749  | 0.10000 | 0.09919 | 17530.49251 | 0.00749  | 0.5000 |  |
| 16: 19 1 19 18 0 18 | 17530.50000 | 17530.49251 | 0.00749  | 0.10000 | 0.09919 | 17530.49251 | 0.00749  | 0.5000 |  |

NORMALIZED DIAGONAL:

|   |              |   |              |   |              |   |              |   |              |   |              |
|---|--------------|---|--------------|---|--------------|---|--------------|---|--------------|---|--------------|
| 1 | 1.00000E+000 | 2 | 6.29442E-001 | 3 | 2.60863E-001 | 4 | 2.90979E-002 | 5 | 7.49267E-001 | 6 | 2.60250E-003 |
| 7 | 1.32050E-001 | 8 | 9.98264E-001 |   |              |   |              |   |              |   |              |

MARQUARDT PARAMETER = 0, TRUST EXPANSION = 1.00

NEW PARAMETER (EST. ERROR) -- CHANGE THIS ITERATION

|   |       |          |                 |           |
|---|-------|----------|-----------------|-----------|
| 1 | 10000 | A        | 893.0982(207)   | 0.0000    |
| 2 | 20000 | B        | 685.617( 59)    | -0.000    |
| 3 | 30000 | C        | 453.1270( 94)   | 0.0000    |
| 4 | 200   | -DeltaJ  | -1.692(295)E-03 | 0.000E-03 |
| 5 | 2000  | -DeltaK  | -0.01174( 88)   | 0.00000   |
| 6 | 1100  | -DeltaJK | 0.01313(116)    | -0.00000  |
| 7 | 40100 | -deltaJ  | 2.861(173)E-03  | 0.000E-03 |
| 8 | 41000 | -deltaK  | -0.01926( 84)   | 0.00000   |

MICROWAVE AVG = -0.000187 MHz, IR AVG = 0.00000

MICROWAVE RMS = 0.023956 MHz, IR RMS = 0.00000

### D2O\_wuudu SPFIT Output

EXP.FREQ. - CALC.FREQ. - DIFF. - EXP.ERR.- EST.ERR.-AVG. CALC.FREQ. - DIFF. - WT.

|                     |             |             |          |         |         |             |          |        |  |
|---------------------|-------------|-------------|----------|---------|---------|-------------|----------|--------|--|
| 1: 7 5 3 6 4 3      | 11070.57000 | 11070.53861 | 0.03139  | 0.10000 | 0.00000 |             |          |        |  |
| 2: 7 5 3 6 4 3      | 11070.57000 | 11070.53861 | 0.03139  | 0.10000 | 0.00000 |             |          |        |  |
| 3: 8 5 4 7 4 4      | 12422.21000 | 12422.23853 | -0.02853 | 0.10000 | 0.00000 |             |          |        |  |
| 4: 9 7 3 8 6 3      | 14511.28000 | 14511.33349 | -0.05349 | 0.10000 | 0.00000 |             |          |        |  |
| 5: 11 8 4 10 7 4    | 17479.59000 | 17479.56221 | 0.02779  | 0.10000 | 0.00000 |             |          |        |  |
| 6: 13 2 11 12 2 10  | 13334.29000 | 13334.28483 | 0.00517  | 0.10000 | 0.00000 | 13334.28842 | 0.00158  | 0.5000 |  |
| 7: 13 3 11 12 2 10  | 13334.29000 | 13334.29200 | -0.00200 | 0.10000 | 0.00000 | 13334.28842 | 0.00158  | 0.5000 |  |
| 8: 14 3 12 13 2 11  | 14232.16000 | 14232.05701 | 0.10299  | 0.10000 | 0.00000 |             |          |        |  |
| 9: 15 3 12 14 3 11  | 15790.92000 | 15791.07577 | -0.15577 | 0.10000 | 0.00000 | 15791.08205 | -0.16205 | 0.5000 |  |
| 10: 15 4 12 14 3 11 | 15790.92000 | 15791.08833 | -0.16833 | 0.10000 | 0.00000 | 15791.08205 | -0.16205 | 0.5000 |  |
| 11: 16 4 12 15 4 11 | 17353.44000 | 17353.34249 | 0.09751  | 0.10000 | 0.00000 | 17353.38390 | 0.05610  | 0.5000 |  |
| 12: 16 5 12 15 4 11 | 17353.44000 | 17353.42531 | 0.01469  | 0.10000 | 0.00000 | 17353.38390 | 0.05610  | 0.5000 |  |
| 13: 17 0 17 16 0 16 | 15608.95000 | 15608.97472 | -0.02472 | 0.10000 | 0.00000 | 15608.97472 | -0.02472 | 0.5000 |  |
| 14: 17 1 17 16 0 16 | 15608.95000 | 15608.97472 | -0.02472 | 0.10000 | 0.00000 | 15608.97472 | -0.02472 | 0.5000 |  |
| 15: 18 1 17 17 1 16 | 17162.52000 | 17162.49467 | 0.02533  | 0.10000 | 0.00000 | 17162.49467 | 0.02533  | 0.5000 |  |
| 16: 18 2 17 17 1 16 | 17162.52000 | 17162.49467 | 0.02533  | 0.10000 | 0.00000 | 17162.49467 | 0.02533  | 0.5000 |  |

NORMALIZED DIAGONAL:

1 1.00000E+000 2 3.33326E-001 3 1.67519E-001 4 6.62688E-002 5 6.67432E-001 6 7.54276E-004  
7 1.17272E-001 8 9.99775E-001

MARQUARDT PARAMETER = 0, TRUST EXPANSION = 1.00

NEW PARAMETER (EST. ERROR) -- CHANGE THIS ITERATION

|   |       |          |                |            |
|---|-------|----------|----------------|------------|
| 1 | 10000 | A        | 884.948( 40)   | -0.000     |
| 2 | 20000 | B        | 697.458( 60)   | 0.000      |
| 3 | 30000 | C        | 449.724( 38)   | -0.000     |
| 4 | 200   | -DeltaJ  | -6.67( 87)E-03 | -0.00E-03  |
| 5 | 2000  | -DeltaK  | -0.0253( 32)   | -0.0000    |
| 6 | 1100  | -DeltaJK | 0.0314( 41)    | 0.0000     |
| 7 | 40100 | -deltaJ  | 1.374(165)E-03 | -0.000E-03 |
| 8 | 41000 | -deltaK  | -0.0329( 33)   | -0.0000    |

MICROWAVE AVG = 0.000708 MHz, IR AVG = 0.00000

MICROWAVE RMS = 0.065843 MHz, IR RMS = 0.00000

### D2O\_wudud SPFIT Output

EXP.FREQ. - CALC.FREQ. - DIFF. - EXP.ERR.- EST.ERR.-AVG. CALC.FREQ. - DIFF. - WT.

|                     |             |             |          |         |         |             |          |        |  |
|---------------------|-------------|-------------|----------|---------|---------|-------------|----------|--------|--|
| 1: 6 6 1 5 5 1      | 10381.55000 | 10381.55628 | -0.00628 | 0.10000 | 0.00000 |             |          |        |  |
| 2: 6 6 1 5 5 1      | 10381.55000 | 10381.55628 | -0.00628 | 0.10000 | 0.00000 |             |          |        |  |
| 3: 7 5 2 6 4 2      | 10840.27000 | 10840.25856 | 0.01144  | 0.10000 | 0.00000 |             |          |        |  |
| 4: 10 3 8 9 2 8     | 15241.84000 | 15241.85202 | -0.01202 | 0.10000 | 0.00000 |             |          |        |  |
| 5: 10 10 1 9 9 1    | 17501.95000 | 17501.94891 | 0.00109  | 0.10000 | 0.00000 |             |          |        |  |
| 6: 11 2 9 10 2 8    | 11667.18000 | 11667.13430 | 0.04570  | 0.10000 | 0.00000 |             |          |        |  |
| 7: 12 1 11 11 1 10  | 11966.27000 | 11966.18021 | 0.08979  | 0.10000 | 0.00000 | 11966.18146 | 0.08854  | 0.5000 |  |
| 8: 12 2 11 11 1 10  | 11966.27000 | 11966.18271 | 0.08729  | 0.10000 | 0.00000 | 11966.18146 | 0.08854  | 0.5000 |  |
| 9: 14 0 14 13 0 13  | 13194.46000 | 13194.67774 | -0.21774 | 0.10000 | 0.00000 | 13194.67774 | -0.21774 | 0.5000 |  |
| 10: 14 1 14 13 0 13 | 13194.46000 | 13194.67774 | -0.21774 | 0.10000 | 0.00000 | 13194.67774 | -0.21774 | 0.5000 |  |
| 11: 15 1 14 14 1 13 | 14728.08000 | 14728.08803 | -0.00803 | 0.10000 | 0.00000 | 14728.08804 | -0.00804 | 0.5000 |  |
| 12: 15 2 14 14 1 13 | 14728.08000 | 14728.08805 | -0.00805 | 0.10000 | 0.00000 | 14728.08804 | -0.00804 | 0.5000 |  |
| 13: 16 0 16 15 0 15 | 15037.50000 | 15037.36128 | 0.13872  | 0.10000 | 0.00000 | 15037.36128 | 0.13872  | 0.5000 |  |
| 14: 16 1 16 15 0 15 | 15037.50000 | 15037.36128 | 0.13872  | 0.10000 | 0.00000 | 15037.36128 | 0.13872  | 0.5000 |  |
| 15: 17 2 15 16 2 14 | 17185.87000 | 17185.89998 | -0.02998 | 0.10000 | 0.00000 | 17185.90000 | -0.03000 | 0.5000 |  |
| 16: 17 3 15 16 2 14 | 17185.87000 | 17185.90002 | -0.03002 | 0.10000 | 0.00000 | 17185.90000 | -0.03000 | 0.5000 |  |

NORMALIZED DIAGONAL:

1 1.00000E+000 2 7.96420E-001 3 2.35539E-001 4 3.43229E-002 5 5.97360E-001 6 1.69438E-003  
7 3.85199E-001 8 9.98626E-001

MARQUARDT PARAMETER = 0, TRUST EXPANSION = 1.00

NEW PARAMETER (EST. ERROR) -- CHANGE THIS ITERATION

|   |       |          |                |            |
|---|-------|----------|----------------|------------|
| 1 | 10000 | A        | 890.2716(151)  | -0.0000    |
| 2 | 20000 | B        | 678.500( 81)   | 0.000      |
| 3 | 30000 | C        | 460.1564( 70)  | -0.0000    |
| 4 | 200   | -DeltaJ  | 7.92( 58)E-03  | -0.00E-03  |
| 5 | 2000  | -DeltaK  | 0.01910(157)   | -0.00000   |
| 6 | 1100  | -DeltaJK | -0.02651(214)  | 0.00000    |
| 7 | 40100 | -deltaJ  | 4.154(293)E-03 | -0.001E-03 |
| 8 | 41000 | -deltaK  | 8.92(121)E-03  | -0.00E-03  |

MICROWAVE AVG = 0.000466 MHz, IR AVG = 0.00000

MICROWAVE RMS = 0.084154 MHz, IR RMS = 0.00000



### D2O\_wduud SPFIT Output

EXP.FREQ. - CALC.FREQ. - DIFF. - EXP.ERR.- EST.ERR.-AVG. CALC.FREQ. - DIFF. - WT.

|                     |             |             |          |         |         |             |          |        |  |
|---------------------|-------------|-------------|----------|---------|---------|-------------|----------|--------|--|
| 1: 6 6 1 5 5 1      | 10196.97000 | 10196.96408 | 0.00592  | 0.10000 | 0.00000 |             |          |        |  |
| 2: 6 6 1 5 5 1      | 10196.97000 | 10196.96408 | 0.00592  | 0.10000 | 0.00000 |             |          |        |  |
| 3: 7 6 1 6 5 1      | 11386.19000 | 11386.25401 | -0.06401 | 0.10000 | 0.00000 |             |          |        |  |
| 4: 9 4 5 8 3 5      | 14012.49000 | 14012.66948 | -0.17948 | 0.10000 | 0.00000 |             |          |        |  |
| 5: 10 4 7 9 3 7     | 15732.91000 | 15732.74497 | 0.16503  | 0.10000 | 0.00000 |             |          |        |  |
| 6: 10 2 8 9 2 7     | 10537.67000 | 10537.73617 | -0.06617 | 0.10000 | 0.00000 | 10537.76535 | -0.09535 | 0.5000 |  |
| 7: 10 3 8 9 2 7     | 10537.67000 | 10537.79453 | -0.12453 | 0.10000 | 0.00000 | 10537.76535 | -0.09535 | 0.5000 |  |
| 8: 10 10 0 9 9 1    | 17158.17000 | 17158.19347 | -0.02347 | 0.10000 | 0.00000 | 17158.16295 | 0.00705  | 0.5000 |  |
| 9: 10 10 1 9 9 1    | 17158.17000 | 17158.13243 | 0.03757  | 0.10000 | 0.00000 | 17158.16295 | 0.00705  | 0.5000 |  |
| 10: 11 1 10 10 1 9  | 10708.08000 | 10707.93947 | 0.14053  | 0.10000 | 0.00000 | 10707.93953 | 0.14047  | 0.5000 |  |
| 11: 11 2 10 10 1 9  | 10708.08000 | 10707.93959 | 0.14041  | 0.10000 | 0.00000 | 10707.93953 | 0.14047  | 0.5000 |  |
| 12: 11 6 5 10 5 5   | 16847.37000 | 16847.33163 | 0.03837  | 0.10000 | 0.00000 |             |          |        |  |
| 13: 11 8 4 10 7 4   | 17476.25000 | 17476.24431 | 0.00569  | 0.10000 | 0.00000 |             |          |        |  |
| 14: 13 0 13 12 0 12 | 11757.49000 | 11757.54124 | -0.05124 | 0.10000 | 0.00000 | 11757.54124 | -0.05124 | 0.5000 |  |
| 15: 13 1 13 12 0 12 | 11757.49000 | 11757.54124 | -0.05124 | 0.10000 | 0.00000 | 11757.54124 | -0.05124 | 0.5000 |  |
| 16: 12 2 10 11 2 9  | 12291.31000 | 12291.24261 | 0.06739  | 0.10000 | 0.00000 | 12291.24325 | 0.06675  | 0.5000 |  |
| 17: 12 3 10 11 2 9  | 12291.31000 | 12291.24388 | 0.06612  | 0.10000 | 0.00000 | 12291.24325 | 0.06675  | 0.5000 |  |
| 18: 14 4 10 13 4 9  | 15465.46000 | 15465.53382 | -0.07382 | 0.10000 | 0.00000 |             |          |        |  |
| 19: 17 1 17 16 1 16 | 15265.45000 | 15265.44391 | 0.00609  | 0.10000 | 0.00000 | 15265.44391 | 0.00609  | 0.5000 |  |
| 20: 17 0 17 16 1 16 | 15265.45000 | 15265.44391 | 0.00609  | 0.10000 | 0.00000 | 15265.44391 | 0.00609  | 0.5000 |  |

NORMALIZED DIAGONAL:

1 1.00000E+000 2 3.21935E-001 3 3.01146E-001 4 1.52053E-001 5 9.98102E-001 6 2.51728E-002  
7 9.23968E-001 8 8.39123E-001

MARQUARDT PARAMETER = 0, TRUST EXPANSION = 1.00

NEW PARAMETER (EST. ERROR) -- CHANGE THIS ITERATION

|   |       |          |                 |            |
|---|-------|----------|-----------------|------------|
| 1 | 10000 | A        | 870.1694( 96)   | 0.0000     |
| 2 | 20000 | B        | 725.4836(132)   | -0.0000    |
| 3 | 30000 | C        | 438.7370( 66)   | -0.0000    |
| 4 | 200   | -DeltaJ  | 1.577( 44)E-03  | 0.000E-03  |
| 5 | 2000  | -DeltaK  | 1.080(139)E-03  | 0.000E-03  |
| 6 | 1100  | -DeltaJK | -2.873(176)E-03 | -0.000E-03 |
| 7 | 40100 | -deltaJ  | 0.1684(300)E-03 | 0.0000E-03 |
| 8 | 41000 | -deltaK  | 0.569(257)E-03  | 0.000E-03  |

MICROWAVE AVG = -0.001614 MHz, IR AVG = 0.00000

MICROWAVE RMS = 0.087244 MHz, IR RMS = 0.00000

### D2O\_wuudu SPFIT Output

EXP.FREQ. - CALC.FREQ. - DIFF. - EXP.ERR.- EST.ERR.-AVG. CALC.FREQ. - DIFF. - WT.

|                     |             |             |          |         |         |
|---------------------|-------------|-------------|----------|---------|---------|
| 1: 7 3 5 6 2 5      | 12530.46000 | 12530.47407 | -0.01407 | 0.10000 | 0.09765 |
| 2: 8 5 4 7 4 4      | 14973.30000 | 14973.30079 | -0.00079 | 0.10000 | 0.09999 |
| 3: 10 0 10 9 1 9    | 10598.68000 | 10598.67935 | 0.00065  | 0.10000 | 0.06692 |
| 4: 10 1 9 9 1 8     | 11397.00000 | 11397.00143 | -0.00143 | 0.10000 | 0.09996 |
| 5: 10 1 10 9 1 9    | 10598.68000 | 10598.71048 | -0.03048 | 0.10000 | 0.06693 |
| 6: 10 4 7 9 3 7     | 17720.95000 | 17720.93813 | 0.01187  | 0.10000 | 0.09834 |
| 7: 11 2 10 10 2 9   | 12412.62000 | 12412.56993 | 0.05007  | 0.10000 | 0.06425 |
| 8: 11 3 8 10 4 7    | 13721.76000 | 13721.76894 | -0.00894 | 0.10000 | 0.09906 |
| 9: 14 3 11 13 4 10  | 17061.02000 | 17061.00504 | 0.01496  | 0.10000 | 0.09734 |
| 10: 14 4 11 13 3 10 | 17108.54000 | 17108.56593 | -0.02593 | 0.10000 | 0.09181 |

NORMALIZED DIAGONAL:

|   |              |   |              |   |              |   |              |   |              |   |              |
|---|--------------|---|--------------|---|--------------|---|--------------|---|--------------|---|--------------|
| 1 | 1.00000E+000 | 2 | 6.46371E-001 | 3 | 5.68982E-001 | 4 | 2.68956E-002 | 5 | 1.20171E-001 | 6 | 8.48027E-004 |
| 7 | 1.39626E-001 | 8 | 9.78173E-001 |   |              |   |              |   |              |   |              |

MARQUARDT PARAMETER = 0, TRUST EXPANSION = 1.00

NEW PARAMETER (EST. ERROR) -- CHANGE THIS ITERATION

|   |       |          |               |          |
|---|-------|----------|---------------|----------|
| 1 | 10000 | A        | 1153.38( 36)  | -0.00    |
| 2 | 20000 | B        | 753.831(130)  | 0.000    |
| 3 | 30000 | C        | 510.3192(241) | -0.0000  |
| 4 | 200   | -DeltaJ  | -0.0203( 33)  | 0.0000   |
| 5 | 2000  | -DeltaK  | -0.0402( 65)  | 0.0000   |
| 6 | 1100  | -DeltaJK | 0.0592( 97)   | -0.0000  |
| 7 | 40100 | -deltaJ  | 0.01312(224)  | -0.00000 |
| 8 | 41000 | -deltaK  | -0.0351( 57)  | 0.0000   |

MICROWAVE AVG = -0.000410 MHz, IR AVG = 0.00000

MICROWAVE RMS = 0.021805 MHz, IR RMS = 0.00000

### D2O\_wwduu SPFIT Output

EXP.FREQ. - CALC.FREQ. - DIFF. - EXP.ERR.- EST.ERR.-AVG. CALC.FREQ. - DIFF. - WT.

|    |                 |             |             |          |         |         |
|----|-----------------|-------------|-------------|----------|---------|---------|
| 1: | 6 5 2 5 4 2     | 11938.32000 | 11938.32000 | 0.00000  | 0.10000 | 0.10000 |
| 2: | 11 0 11 10 1 10 | 11772.76000 | 11772.70993 | 0.05007  | 0.10000 | 0.07071 |
| 3: | 11 1 11 10 1 10 | 11772.66000 | 11772.71007 | -0.05007 | 0.10000 | 0.07071 |
| 4: | 13 4 9 12 5 8   | 17162.51000 | 17162.51000 | -0.00000 | 0.10000 | 0.10000 |

NORMALIZED DIAGONAL:

1 1.00000E+000 2 6.60643E-001 3 9.76639E-001

MARQUARDT PARAMETER = 0, TRUST EXPANSION = 1.00

NEW PARAMETER (EST. ERROR) -- CHANGE THIS ITERATION

|   |       |   |                |         |
|---|-------|---|----------------|---------|
| 1 | 10000 | A | 1092.7203(141) | -0.0000 |
| 2 | 20000 | B | 814.5854(195)  | 0.0000  |
| 3 | 30000 | C | 516.2677( 37)  | -0.0000 |

MICROWAVE AVG = 0.000000 MHz, IR AVG = 0.00000

MICROWAVE RMS = 0.035407 MHz, IR RMS = 0.00000

### D2O\_wuuu SPFIT Output

EXP.FREQ. - CALC.FREQ. - DIFF. - EXP.ERR.- EST.ERR.-AVG. CALC.FREQ. - DIFF. - WT.

|                    |             |             |          |         |         |             |          |        |  |
|--------------------|-------------|-------------|----------|---------|---------|-------------|----------|--------|--|
| 1: 6 2 5 5 1 5     | 10893.86000 | 10893.87163 | -0.01163 | 0.10000 | 0.09941 |             |          |        |  |
| 2: 9 3 6 8 2 6     | 15732.90000 | 15732.89499 | 0.00501  | 0.10000 | 0.09990 |             |          |        |  |
| 3: 10 2 9 9 1 8    | 11357.45000 | 11357.48563 | -0.03563 | 0.10000 | 0.09446 |             |          |        |  |
| 4: 11 0 11 10 0 10 | 11546.44000 | 11546.44918 | -0.00918 | 0.10000 | 0.09955 | 11546.45054 | -0.01054 | 0.5000 |  |
| 5: 11 1 11 10 0 10 | 11546.44000 | 11546.45189 | -0.01189 | 0.10000 | 0.09955 | 11546.45054 | -0.01054 | 0.5000 |  |
| 6: 12 3 9 11 3 8   | 15091.55000 | 15091.51461 | 0.03539  | 0.10000 | 0.09444 |             |          |        |  |
| 7: 13 3 11 12 2 10 | 15214.14000 | 15214.06358 | 0.07642  | 0.10000 | 0.07085 |             |          |        |  |
| 8: 14 3 11 13 3 10 | 17062.51000 | 17062.56294 | -0.05294 | 0.10000 | 0.08679 |             |          |        |  |
| 9: 14 3 11 13 4 10 | 17049.37000 | 17049.38277 | -0.01277 | 0.10000 | 0.10010 |             |          |        |  |

NORMALIZED DIAGONAL:

|   |              |   |              |   |              |   |              |   |              |   |              |
|---|--------------|---|--------------|---|--------------|---|--------------|---|--------------|---|--------------|
| 1 | 1.00000E+000 | 2 | 6.45859E-001 | 3 | 1.49703E-001 | 4 | 5.84292E-003 | 5 | 7.71266E-001 | 6 | 8.31505E-007 |
| 7 | 9.49613E-002 | 8 | 3.59432E-001 |   |              |   |              |   |              |   |              |

MARQUARDT PARAMETER = 9.08602e-009, TRUST EXPANSION = 1.00

NEW PARAMETER (EST. ERROR) -- CHANGE THIS ITERATION

|   |       |          |              |         |
|---|-------|----------|--------------|---------|
| 1 | 10000 | A        | 1139.53(107) | -0.01   |
| 2 | 20000 | B        | 770.44( 34)  | 0.00    |
| 3 | 30000 | C        | 506.478( 60) | 0.000   |
| 4 | 200   | -DeltaJ  | -0.0201(199) | 0.0002  |
| 5 | 2000  | -DeltaK  | -0.027( 44)  | 0.000   |
| 6 | 1100  | -DeltaJK | 0.046( 64)   | -0.000  |
| 7 | 40100 | -deltaJ  | 0.0152(123)  | -0.0001 |
| 8 | 41000 | -deltaK  | -0.025( 41)  | 0.000   |

MICROWAVE AVG = -0.000837 MHz, IR AVG = 0.00000

MICROWAVE RMS = 0.038078 MHz, IR RMS = 0.00000

### D2O\_wwuud SPFIT Output

EXP.FREQ. - CALC.FREQ. - DIFF. - EXP.ERR.- EST.ERR.-AVG. CALC.FREQ. - DIFF. - WT.

|     |               |             |             |          |         |         |             |         |        |
|-----|---------------|-------------|-------------|----------|---------|---------|-------------|---------|--------|
| 1:  | 7 3 4 6 2 4   | 12651.48000 | 12651.51809 | -0.03809 | 0.10000 | 0.09503 |             |         |        |
| 2:  | 7 4 4 6 3 4   | 13071.99000 | 13072.02354 | -0.03354 | 0.10000 | 0.09617 |             |         |        |
| 3:  | 8 8 0 7 7 1   | 16941.23000 | 16941.28234 | -0.05234 | 0.10000 | 0.09999 | 16941.22798 | 0.00202 | 0.5000 |
| 4:  | 8 8 1 7 7 1   | 16941.23000 | 16941.17363 | 0.05637  | 0.10000 | 0.09999 | 16941.22798 | 0.00202 | 0.5000 |
| 5:  | 9 2 7 8 1 7   | 16789.62000 | 16789.56197 | 0.05803  | 0.10000 | 0.08804 |             |         |        |
| 6:  | 9 4 6 8 3 5   | 12411.50000 | 12411.50616 | -0.00616 | 0.10000 | 0.09987 |             |         |        |
| 7:  | 10 1 9 9 1 8  | 11490.78000 | 11490.71651 | 0.06349  | 0.10000 | 0.09053 | 11490.72804 | 0.05196 | 0.5000 |
| 8:  | 10 2 9 9 1 8  | 11490.78000 | 11490.73956 | 0.04044  | 0.10000 | 0.09053 | 11490.72804 | 0.05196 | 0.5000 |
| 9:  | 11 8 4 10 8 3 | 15808.85000 | 15808.84232 | 0.00768  | 0.10000 | 0.09979 |             |         |        |
| 10: | 12 4 9 11 3 8 | 15265.42000 | 15265.49504 | -0.07504 | 0.10000 | 0.07906 |             |         |        |
| 11: | 13 5 9 12 5 8 | 17151.97000 | 17151.94577 | 0.02423  | 0.10000 | 0.09789 |             |         |        |

NORMALIZED DIAGONAL:

|   |              |   |              |   |              |   |              |   |              |   |              |
|---|--------------|---|--------------|---|--------------|---|--------------|---|--------------|---|--------------|
| 1 | 1.00000E+000 | 2 | 1.08222E-001 | 3 | 5.53102E-001 | 4 | 1.55535E-001 | 5 | 2.12711E-001 | 6 | 1.29948E-002 |
| 7 | 9.70338E-001 | 8 | 8.14517E-001 |   |              |   |              |   |              |   |              |

MARQUARDT PARAMETER = 0, TRUST EXPANSION = 1.00

NEW PARAMETER (EST. ERROR) -- CHANGE THIS ITERATION

|   |       |          |                |           |
|---|-------|----------|----------------|-----------|
| 1 | 10000 | A        | 1083.029( 64)  | 0.000     |
| 2 | 20000 | B        | 831.529( 44)   | -0.000    |
| 3 | 30000 | C        | 510.1725(277)  | 0.0000    |
| 4 | 200   | -DeltaJ  | 0.152(154)E-03 | 0.000E-03 |
| 5 | 2000  | -DeltaK  | 5.47( 90)E-03  | 0.00E-03  |
| 6 | 1100  | -DeltaJK | -5.50(108)E-03 | -0.00E-03 |
| 7 | 40100 | -deltaJ  | 2.118(280)E-03 | 0.000E-03 |
| 8 | 41000 | -deltaK  | 1.90( 96)E-03  | 0.00E-03  |

MICROWAVE AVG = -0.000990 MHz, IR AVG = 0.00000

MICROWAVE RMS = 0.040773 MHz, IR RMS = 0.00000

### D2O\_wwdud SPFIT Output

|    | EXP.FREQ. | - CALC.FREQ. | - DIFF. | - EXP.ERR. | - EST.ERR. | -AVG. CALC.FREQ. | - DIFF.     | - WT.       |          |         |         |
|----|-----------|--------------|---------|------------|------------|------------------|-------------|-------------|----------|---------|---------|
| 1: | 7         | 3            | 4       | 6          | 2          | 4                | 12562.03000 | 12562.07628 | -0.04628 | 0.10000 | 0.09820 |
| 2: | 8         | 2            | 6       | 7          | 3          | 5                | 10670.29000 | 10670.08713 | 0.20287  | 0.10000 | 0.05674 |
| 3: | 9         | 1            | 9       | 8          | 0          | 8                | 10318.42000 | 10318.55124 | -0.13124 | 0.10000 | 0.08463 |
| 4: | 9         | 8            | 2       | 8          | 7          | 2                | 17508.18000 | 17508.19305 | -0.01305 | 0.10000 | 0.09986 |

NORMALIZED DIAGONAL:

1 1.00000E+000 2 9.38376E-001 3 9.93248E-001

MARQUARDT PARAMETER = 0, TRUST EXPANSION = 1.00

NEW PARAMETER (EST. ERROR) -- CHANGE THIS ITERATION

|   |       |   |                |         |
|---|-------|---|----------------|---------|
| 1 | 10000 | A | 1021.4800( 72) | -0.0000 |
| 2 | 20000 | B | 838.8022( 76)  | 0.0000  |
| 3 | 30000 | C | 552.9136( 50)  | 0.0000  |

MICROWAVE AVG = 0.003076 MHz, IR AVG = 0.00000

MICROWAVE RMS = 0.123177 MHz, IR RMS = 0.00000

### D2O\_wwudu SPFIT Output

EXP.FREQ. - CALC.FREQ. - DIFF. - EXP.ERR.- EST.ERR.-AVG. CALC.FREQ. - DIFF. - WT.

|    |               |             |             |          |         |         |
|----|---------------|-------------|-------------|----------|---------|---------|
| 1: | 8 2 7 7 1 7   | 14653.17000 | 14652.86267 | 0.30733  | 0.10000 | 0.07084 |
| 2: | 8 4 5 7 3 5   | 14550.80000 | 14551.06178 | -0.26178 | 0.10000 | 0.06897 |
| 3: | 10 4 7 9 3 6  | 13527.60000 | 13527.40895 | 0.19105  | 0.10000 | 0.06402 |
| 4: | 10 5 6 9 4 5  | 14686.63000 | 14686.75974 | -0.12974 | 0.10000 | 0.08627 |
| 5: | 12 5 7 11 6 6 | 16855.37000 | 16855.45141 | -0.08141 | 0.10000 | 0.09324 |

NORMALIZED DIAGONAL:

1 1.00000E+000 2 9.83032E-001 3 8.14042E-001

MARQUARDT PARAMETER = 0, TRUST EXPANSION = 1.00

NEW PARAMETER (EST. ERROR) -- CHANGE THIS ITERATION

|   |       |   |                |         |
|---|-------|---|----------------|---------|
| 1 | 10000 | A | 1040.1180( 91) | -0.0000 |
| 2 | 20000 | B | 826.1940( 43)  | 0.0000  |
| 3 | 30000 | C | 540.7627( 58)  | 0.0000  |

MICROWAVE AVG = 0.005091 MHz, IR AVG = 0.00000

MICROWAVE RMS = 0.211158 MHz, IR RMS = 0.00000

### D2O\_wuwud SPFIT Output

EXP.FREQ. - CALC.FREQ. - DIFF. - EXP.ERR.- EST.ERR.-AVG. CALC.FREQ. - DIFF. - WT.

|    |               |             |             |          |         |         |
|----|---------------|-------------|-------------|----------|---------|---------|
| 1: | 9 2 7 8 1 7   | 15808.85000 | 15808.62664 | 0.22336  | 0.10000 | 0.08631 |
| 2: | 10 2 9 9 1 9  | 17888.73000 | 17888.92577 | -0.19577 | 0.10000 | 0.08956 |
| 3: | 12 3 9 11 3 8 | 15053.12000 | 15052.89176 | 0.22824  | 0.10000 | 0.08556 |
| 4: | 12 4 9 11 4 8 | 14889.22000 | 14889.45241 | -0.23241 | 0.10000 | 0.08499 |

NORMALIZED DIAGONAL:

1 1.00000E+000 2 3.18339E-001 3 9.58917E-001

MARQUARDT PARAMETER = 0, TRUST EXPANSION = 1.00

NEW PARAMETER (EST. ERROR) -- CHANGE THIS ITERATION

|   |       |   |               |        |
|---|-------|---|---------------|--------|
| 1 | 10000 | A | 1160.514( 44) | -0.000 |
| 2 | 20000 | B | 744.3230(118) | 0.0000 |
| 3 | 30000 | C | 505.7563( 53) | 0.0000 |

MICROWAVE AVG = 0.005855 MHz, IR AVG = 0.00000

MICROWAVE RMS = 0.220408 MHz, IR RMS = 0.00000



### D2O\_wwdu SPFIT Output

EXP.FREQ. - CALC.FREQ. - DIFF. - EXP.ERR.- EST.ERR.-AVG. CALC.FREQ. - DIFF. - WT.

|                     |             |             |          |         |         |             |          |        |  |
|---------------------|-------------|-------------|----------|---------|---------|-------------|----------|--------|--|
| 1: 6 4 3 5 3 2      | 11310.52000 | 11310.52073 | -0.00073 | 0.10000 | 0.09723 |             |          |        |  |
| 2: 7 5 3 6 5 2      | 13012.87000 | 13012.87167 | -0.00167 | 0.10000 | 0.09405 |             |          |        |  |
| 3: 7 6 2 6 6 1      | 13306.18000 | 13306.17961 | 0.00039  | 0.10000 | 0.09987 |             |          |        |  |
| 4: 7 7 1 6 6 0      | 16279.02000 | 16279.01996 | 0.00004  | 0.10000 | 0.10000 |             |          |        |  |
| 5: 8 3 5 7 3 4      | 13527.60000 | 13527.59011 | 0.00989  | 0.10000 | 0.05349 |             |          |        |  |
| 6: 8 4 5 7 3 4      | 13529.70000 | 13529.70641 | -0.00641 | 0.10000 | 0.05287 |             |          |        |  |
| 7: 9 2 7 8 2 6      | 13739.83000 | 13739.83030 | -0.00030 | 0.10000 | 0.07975 | 13739.83216 | -0.00216 | 0.5000 |  |
| 8: 9 3 7 8 2 6      | 13739.83000 | 13739.83403 | -0.00403 | 0.10000 | 0.07975 | 13739.83216 | -0.00216 | 0.5000 |  |
| 9: 9 6 4 8 6 3      | 16667.62000 | 16667.61948 | 0.00052  | 0.10000 | 0.09886 |             |          |        |  |
| 10: 17 5 12 17 4 13 | 12641.72000 | 12641.72025 | -0.00025 | 0.10000 | 0.09974 | 12641.72025 | -0.00025 | 0.5000 |  |
| 11: 17 5 12 17 5 13 | 12641.72000 | 12641.72025 | -0.00025 | 0.10000 | 0.09974 | 12641.72025 | -0.00025 | 0.5000 |  |
| 12: 18 7 12 18 6 13 | 12626.97000 | 12626.96990 | 0.00010  | 0.10000 | 0.09995 |             |          |        |  |

NORMALIZED DIAGONAL:

|   |              |   |              |   |              |   |              |   |              |   |              |
|---|--------------|---|--------------|---|--------------|---|--------------|---|--------------|---|--------------|
| 1 | 1.00000E+000 | 2 | 3.69807E-001 | 3 | 1.73616E-001 | 4 | 9.21532E-001 | 5 | 8.82758E-002 | 6 | 1.44566E-002 |
| 7 | 9.69919E-001 | 8 | 2.81731E-001 |   |              |   |              |   |              |   |              |

MARQUARDT PARAMETER = 0, TRUST EXPANSION = 1.00

NEW PARAMETER (EST. ERROR) -- CHANGE THIS ITERATION

|   |       |          |                 |            |
|---|-------|----------|-----------------|------------|
| 1 | 10000 | A        | 1183.0933(253)  | -0.0000    |
| 2 | 20000 | B        | 1081.6496(154)  | 0.0000     |
| 3 | 30000 | C        | 622.563( 32)    | 0.000      |
| 4 | 200   | -DeltaJ  | -0.831(108)E-03 | 0.000E-03  |
| 5 | 2000  | -DeltaK  | 0.75( 43)E-03   | 0.00E-03   |
| 6 | 1100  | -DeltaJK | -1.63( 59)E-03  | -0.00E-03  |
| 7 | 40100 | -deltaJ  | -0.041(133)E-03 | -0.000E-03 |
| 8 | 41000 | -deltaK  | 2.64(177)E-03   | 0.00E-03   |

MICROWAVE AVG = -0.000028 MHz, IR AVG = 0.00000

MICROWAVE RMS = 0.003840 MHz, IR RMS = 0.00000

### D2O\_wwwud SPFIT Output

EXP.FREQ. - CALC.FREQ. - DIFF. - EXP.ERR.- EST.ERR.-AVG. CALC.FREQ. - DIFF. - WT.

|     |              |             |             |          |         |         |
|-----|--------------|-------------|-------------|----------|---------|---------|
| 1:  | 5 4 2 4 3 2  | 11306.15000 | 11306.16582 | -0.01582 | 0.10000 | 0.09063 |
| 2:  | 6 3 4 5 2 4  | 13492.19000 | 13492.22664 | -0.03664 | 0.10000 | 0.06446 |
| 3:  | 6 5 2 5 4 2  | 13588.95000 | 13588.92191 | 0.02809  | 0.10000 | 0.07647 |
| 4:  | 7 3 4 6 2 4  | 15720.95000 | 15720.96541 | -0.01541 | 0.10000 | 0.08588 |
| 5:  | 7 3 5 6 2 5  | 15744.73000 | 15744.69388 | 0.03612  | 0.10000 | 0.08095 |
| 6:  | 8 4 5 7 3 4  | 13607.72000 | 13607.71416 | 0.00584  | 0.10000 | 0.09883 |
| 7:  | 8 7 2 7 7 1  | 15368.90000 | 15368.89917 | 0.00083  | 0.10000 | 0.09999 |
| 8:  | 9 4 6 8 4 5  | 14866.67000 | 14866.66565 | 0.00435  | 0.10000 | 0.09499 |
| 9:  | 9 6 4 8 5 3  | 17131.25000 | 17131.25493 | -0.00493 | 0.10000 | 0.09926 |
| 10: | 10 5 6 9 5 5 | 17122.14000 | 17122.14627 | -0.00627 | 0.10000 | 0.09598 |

NORMALIZED DIAGONAL:

|   |              |   |              |   |              |   |              |   |              |   |              |
|---|--------------|---|--------------|---|--------------|---|--------------|---|--------------|---|--------------|
| 1 | 1.00000E+000 | 2 | 9.70756E-001 | 3 | 7.31932E-001 | 4 | 1.64318E-001 | 5 | 1.39172E-001 | 6 | 1.68451E-002 |
| 7 | 5.93207E-002 | 8 | 9.93737E-001 |   |              |   |              |   |              |   |              |

MARQUARDT PARAMETER = 0, TRUST EXPANSION = 1.00

NEW PARAMETER (EST. ERROR) -- CHANGE THIS ITERATION

|   |       |          |                |           |
|---|-------|----------|----------------|-----------|
| 1 | 10000 | A        | 1173.543(108)  | -0.000    |
| 2 | 20000 | B        | 1082.289( 91)  | 0.000     |
| 3 | 30000 | C        | 634.443( 42)   | 0.000     |
| 4 | 200   | -DeltaJ  | -4.41( 60)E-03 | 0.00E-03  |
| 5 | 2000  | -DeltaK  | -6.03(180)E-03 | 0.00E-03  |
| 6 | 1100  | -DeltaJK | 0.01573(229)   | -0.00000  |
| 7 | 40100 | -deltaJ  | 3.08(102)E-03  | -0.00E-03 |
| 8 | 41000 | -deltaK  | -0.0372( 53)   | 0.00000   |

MICROWAVE AVG = -0.000384 MHz, IR AVG = 0.00000

MICROWAVE RMS = 0.020103 MHz, IR RMS = 0.00000

### D2O\_wwuwd SPFIT Output

|    | EXP.FREQ.       | - CALC.FREQ. | - DIFF.     | - EXP.ERR. | - EST.ERR. | -AVG. CALC.FREQ. | - DIFF. | - WT. |
|----|-----------------|--------------|-------------|------------|------------|------------------|---------|-------|
| 1: | 5 3 2 4 2 2     | 11178.25000  | 11178.18122 | 0.06878    | 0.10000    | 0.04782          |         |       |
| 2: | 7 5 3 6 4 3     | 17693.38000  | 17693.41710 | -0.03710   | 0.10000    | 0.08757          |         |       |
| 3: | 8 1 7 7 1 6     | 11013.60000  | 11013.60971 | -0.00971   | 0.10000    | 0.04154          |         |       |
| 4: | 8 1 7 7 2 6     | 10720.68000  | 10720.68679 | -0.00679   | 0.10000    | 0.08944          |         |       |
| 5: | 10 1 9 9 2 8    | 13231.82000  | 13231.81126 | 0.00874    | 0.10000    | 0.05428          |         |       |
| 6: | 11 0 11 10 0 10 | 13428.63000  | 13428.63357 | -0.00357   | 0.10000    | 0.08583          |         |       |

NORMALIZED DIAGONAL:

1 1.00000E+000 2 5.97641E-001 3 9.82898E-001

MARQUARDT PARAMETER = 0, TRUST EXPANSION = 1.00

NEW PARAMETER (EST. ERROR) -- CHANGE THIS ITERATION

|   |       |   |                |         |
|---|-------|---|----------------|---------|
| 1 | 10000 | A | 1560.5497(118) | -0.0000 |
| 2 | 20000 | B | 850.2716(208)  | 0.0000  |
| 3 | 30000 | C | 587.3559( 47)  | -0.0000 |

MICROWAVE AVG = 0.003391 MHz, IR AVG = 0.00000

MICROWAVE RMS = 0.032499 MHz, IR RMS = 0.00000

### D2O\_wwdd SPFIT Output

|                | EXP.FREQ.   | - CALC.FREQ. | - DIFF.  | - EXP.ERR. | - EST.ERR. | -AVG. CALC.FREQ. | - DIFF. | - WT. |
|----------------|-------------|--------------|----------|------------|------------|------------------|---------|-------|
| 1: 6 6 0 5 5 1 | 14317.78000 | 14317.73173  | 0.04827  | 0.10000    | 0.09266    |                  |         |       |
| 2: 7 5 2 6 3 3 | 17708.24000 | 17708.31046  | -0.07046 | 0.10000    | 0.08359    |                  |         |       |
| 3: 8 3 5 7 4 4 | 13409.81000 | 13409.86928  | -0.05928 | 0.10000    | 0.08870    |                  |         |       |
| 4: 9 6 3 8 6 2 | 17945.29000 | 17945.21469  | 0.07531  | 0.10000    | 0.08098    |                  |         |       |

NORMALIZED DIAGONAL:

1 1.00000E+000 2 9.73228E-001 3 9.99177E-001

MARQUARDT PARAMETER = 0, TRUST EXPANSION = 1.00

NEW PARAMETER (EST. ERROR) -- CHANGE THIS ITERATION

|   |       |   |                |         |
|---|-------|---|----------------|---------|
| 1 | 10000 | A | 1212.9260( 94) | 0.0000  |
| 2 | 20000 | B | 1076.7211( 44) | -0.0000 |
| 3 | 30000 | C | 603.7366( 97)  | 0.0000  |

MICROWAVE AVG = -0.001538 MHz, IR AVG = 0.00000

MICROWAVE RMS = 0.064187 MHz, IR RMS = 0.00000

### D2O\_wwwu SPFIT Output

EXP.FREQ. - CALC.FREQ. - DIFF. - EXP.ERR.- EST.ERR.-AVG. CALC.FREQ. - DIFF. - WT.

|    |             |             |             |          |         |         |
|----|-------------|-------------|-------------|----------|---------|---------|
| 1: | 5 3 3 4 2 3 | 11484.15000 | 11484.49164 | -0.34164 | 0.10000 | 0.07150 |
| 2: | 5 4 2 4 3 2 | 12753.26000 | 12753.00837 | 0.25163  | 0.10000 | 0.08569 |
| 3: | 8 3 6 7 3 5 | 11645.70000 | 11645.84033 | -0.14033 | 0.10000 | 0.09583 |
| 4: | 8 5 4 7 5 3 | 11943.55000 | 11943.35340 | 0.19660  | 0.10000 | 0.09156 |

NORMALIZED DIAGONAL:

1 1.00000E+000 2 4.46745E-001 3 9.92512E-001

MARQUARDT PARAMETER = 0, TRUST EXPANSION = 1.00

NEW PARAMETER (EST. ERROR) -- CHANGE THIS ITERATION

|   |       |   |                |         |
|---|-------|---|----------------|---------|
| 1 | 10000 | A | 1502.6606(133) | -0.0000 |
| 2 | 20000 | B | 859.9598(165)  | -0.0000 |
| 3 | 30000 | C | 591.7598(201)  | 0.0000  |

MICROWAVE AVG = -0.008436 MHz, IR AVG = 0.00000

MICROWAVE RMS = 0.244120 MHz, IR RMS = 0.00000

### D2O\_wwwu SPFIT Output

EXP.FREQ. - CALC.FREQ. - DIFF. - EXP.ERR.- EST.ERR.-AVG. CALC.FREQ. - DIFF. - WT.

|     |                 |             |             |          |         |         |             |         |        |
|-----|-----------------|-------------|-------------|----------|---------|---------|-------------|---------|--------|
| 1:  | 4 4 1 3 3 1     | 13209.81000 | 13209.81000 | -0.00000 | 0.10000 | 0.10000 |             |         |        |
| 2:  | 8 1 7 7 1 6     | 13466.53000 | 13466.58042 | -0.05042 | 0.10000 | 0.07933 |             |         |        |
| 3:  | 8 6 3 7 6 2     | 15467.91000 | 15467.91057 | -0.00057 | 0.10000 | 0.10000 |             |         |        |
| 4:  | 9 2 8 8 1 7     | 14886.66000 | 14886.59645 | 0.06355  | 0.10000 | 0.06412 |             |         |        |
| 5:  | 10 0 10 9 1 9   | 14973.30000 | 14973.28674 | 0.01326  | 0.10000 | 0.09998 | 14973.29822 | 0.00178 | 0.5000 |
| 6:  | 10 1 10 9 1 9   | 14973.30000 | 14973.30969 | -0.00969 | 0.10000 | 0.09998 | 14973.29822 | 0.00178 | 0.5000 |
| 7:  | 11 1 10 10 2 9  | 17730.48000 | 17730.49653 | -0.01653 | 0.10000 | 0.09798 |             |         |        |
| 8:  | 13 4 9 13 3 10  | 11265.24000 | 11265.23968 | 0.00032  | 0.10000 | 0.10000 |             |         |        |
| 9:  | 14 3 11 14 2 12 | 14585.75000 | 14585.74897 | 0.00103  | 0.10000 | 0.09998 |             |         |        |
| 10: | 17 4 13 17 4 14 | 16985.83000 | 16985.83061 | -0.00061 | 0.10000 | 0.10000 |             |         |        |

NORMALIZED DIAGONAL:

|   |              |   |              |   |              |   |              |   |              |   |              |
|---|--------------|---|--------------|---|--------------|---|--------------|---|--------------|---|--------------|
| 1 | 1.00000E+000 | 2 | 2.48725E-001 | 3 | 1.70831E-001 | 4 | 9.90207E-001 | 5 | 4.60502E-001 | 6 | 1.17002E-003 |
| 7 | 1.12541E-001 | 8 | 8.12936E-001 |   |              |   |              |   |              |   |              |

MARQUARDT PARAMETER = 0, TRUST EXPANSION = 1.00

NEW PARAMETER (EST. ERROR) -- CHANGE THIS ITERATION

|   |       |          |                |           |
|---|-------|----------|----------------|-----------|
| 1 | 10000 | A        | 1748.683(105)  | 0.000     |
| 2 | 20000 | B        | 1139.579( 45)  | -0.000    |
| 3 | 30000 | C        | 715.9006(182)  | -0.0000   |
| 4 | 200   | -DeltaJ  | 0.72(188)E-03  | -0.00E-03 |
| 5 | 2000  | -DeltaK  | 1.6( 45)E-03   | -0.0E-03  |
| 6 | 1100  | -DeltaJK | -4.1( 64)E-03  | 0.0E-03   |
| 7 | 40100 | -deltaJ  | -0.66(113)E-03 | 0.00E-03  |
| 8 | 41000 | -deltaK  | 1.7( 39)E-03   | -0.0E-03  |

MICROWAVE AVG = -0.000162 MHz, IR AVG = 0.00000

MICROWAVE RMS = 0.027609 MHz, IR RMS = 0.00000

### D2O\_wwwwd SPFIT Output

EXP.FREQ. - CALC.FREQ. - DIFF. - EXP.ERR.- EST.ERR.-AVG. CALC.FREQ. - DIFF. - WT.

|                     |             |             |          |         |         |             |          |        |  |
|---------------------|-------------|-------------|----------|---------|---------|-------------|----------|--------|--|
| 1: 5 4 1 4 3 1      | 14866.67000 | 14866.66557 | 0.00443  | 0.10000 | 0.09987 |             |          |        |  |
| 2: 6 2 5 5 1 5      | 16451.83000 | 16451.80194 | 0.02806  | 0.10000 | 0.09478 |             |          |        |  |
| 3: 6 3 4 5 2 4      | 16512.95000 | 16513.00516 | -0.05516 | 0.10000 | 0.07792 |             |          |        |  |
| 4: 9 2 7 8 2 6      | 16497.45000 | 16497.39885 | 0.05115  | 0.10000 | 0.08137 |             |          |        |  |
| 5: 10 3 8 9 3 7     | 17840.27000 | 17840.30199 | -0.03199 | 0.10000 | 0.09317 |             |          |        |  |
| 6: 11 3 8 11 3 9    | 10374.06000 | 10374.05779 | 0.00221  | 0.10000 | 0.09999 |             |          |        |  |
| 7: 11 4 8 11 3 9    | 10517.87000 | 10517.85454 | 0.01546  | 0.10000 | 0.09843 |             |          |        |  |
| 8: 16 4 13 16 2 14  | 17146.90000 | 17146.91083 | -0.01083 | 0.10000 | 0.09993 | 17146.90336 | -0.00336 | 0.5000 |  |
| 9: 16 4 13 16 3 14  | 17146.90000 | 17146.89590 | 0.00410  | 0.10000 | 0.09993 | 17146.90336 | -0.00336 | 0.5000 |  |
| 10: 16 5 11 16 4 12 | 13739.83000 | 13739.83128 | -0.00128 | 0.10000 | 0.09998 |             |          |        |  |

NORMALIZED DIAGONAL:

|   |              |   |              |   |              |   |              |   |              |   |              |
|---|--------------|---|--------------|---|--------------|---|--------------|---|--------------|---|--------------|
| 1 | 1.00000E+000 | 2 | 2.82814E-001 | 3 | 1.12323E-001 | 4 | 8.73705E-001 | 5 | 6.65377E-001 | 6 | 4.71991E-004 |
| 7 | 3.89129E-002 | 8 | 9.99021E-001 |   |              |   |              |   |              |   |              |

MARQUARDT PARAMETER = 0, TRUST EXPANSION = 1.00

NEW PARAMETER (EST. ERROR) -- CHANGE THIS ITERATION

|   |       |          |               |         |
|---|-------|----------|---------------|---------|
| 1 | 10000 | A        | 1723.002(284) | 0.000   |
| 2 | 20000 | B        | 1158.257(133) | -0.000  |
| 3 | 30000 | C        | 728.868(109)  | -0.000  |
| 4 | 200   | -DeltaJ  | 0.0107( 51)   | -0.0000 |
| 5 | 2000  | -DeltaK  | 0.0238(119)   | -0.0000 |
| 6 | 1100  | -DeltaJK | -0.0371(173)  | 0.0000  |
| 7 | 40100 | -deltaJ  | -7.1( 32)E-03 | 0.0E-03 |
| 8 | 41000 | -deltaK  | 0.0203(104)   | -0.0000 |

MICROWAVE AVG = 0.001057 MHz, IR AVG = 0.00000

MICROWAVE RMS = 0.029338 MHz, IR RMS = 0.00000

### D2O\_wwwwd' SPFIT Output

EXP.FREQ. - CALC.FREQ. - DIFF. - EXP.ERR.- EST.ERR.-AVG. CALC.FREQ. - DIFF. - WT.

|                    |             |             |          |         |         |             |          |        |  |
|--------------------|-------------|-------------|----------|---------|---------|-------------|----------|--------|--|
| 1: 8 2 6 7 3 5     | 14864.82000 | 14864.96484 | -0.14484 | 0.10000 | 0.08545 |             |          |        |  |
| 2: 11 0 11 10 0 10 | 17010.49000 | 17010.38711 | 0.10289  | 0.10000 | 0.09259 | 17010.38466 | 0.10534  | 0.2500 |  |
| 3: 11 0 11 10 1 10 | 17010.49000 | 17010.38079 | 0.10921  | 0.10000 | 0.09259 | 17010.38466 | 0.10534  | 0.2500 |  |
| 4: 11 1 11 10 0 10 | 17010.49000 | 17010.38852 | 0.10148  | 0.10000 | 0.09259 | 17010.38466 | 0.10534  | 0.2500 |  |
| 5: 11 1 11 10 1 10 | 17010.49000 | 17010.38221 | 0.10779  | 0.10000 | 0.09259 | 17010.38466 | 0.10534  | 0.2500 |  |
| 6: 13 5 9 13 4 10  | 11306.16000 | 11305.97359 | 0.18641  | 0.10000 | 0.07437 |             |          |        |  |
| 7: 16 3 13 16 2 14 | 16710.09000 | 16710.09702 | -0.00702 | 0.10000 | 0.09271 | 16710.19450 | -0.10450 | 0.5000 |  |
| 8: 16 4 13 16 3 14 | 16710.09000 | 16710.29199 | -0.20199 | 0.10000 | 0.09271 | 16710.19450 | -0.10450 | 0.5000 |  |

NORMALIZED DIAGONAL:

1 1.00000E+000 2 2.76370E-001 3 5.70266E-001

MARQUARDT PARAMETER = 0, TRUST EXPANSION = 1.00

NEW PARAMETER (EST. ERROR) -- CHANGE THIS ITERATION

|   |       |   |                |         |
|---|-------|---|----------------|---------|
| 1 | 10000 | A | 1683.208( 47)  | -0.000  |
| 2 | 20000 | B | 1173.5501(125) | 0.0000  |
| 3 | 30000 | C | 744.3310( 41)  | -0.0000 |

MICROWAVE AVG = 0.010600 MHz, IR AVG = 0.00000

MICROWAVE RMS = 0.139414 MHz, IR RMS = 0.00000



### HDO1\_wduud SPFIT Output

EXP.FREQ. - CALC.FREQ. - DIFF. - EXP.ERR.- EST.ERR.-AVG. CALC.FREQ. - DIFF. - WT.

|    |               |             |             |          |         |         |
|----|---------------|-------------|-------------|----------|---------|---------|
| 1: | 6 6 1 5 5 1   | 10378.35000 | 10378.34958 | 0.00042  | 0.10000 | 0.10000 |
| 2: | 9 4 6 8 3 5   | 10518.43000 | 10518.43291 | -0.00291 | 0.10000 | 0.09998 |
| 3: | 10 4 7 9 4 6  | 11347.28000 | 11347.20650 | 0.07350  | 0.10000 | 0.08494 |
| 4: | 10 5 6 9 4 6  | 15844.39000 | 15844.45962 | -0.06962 | 0.10000 | 0.08661 |
| 5: | 11 3 8 10 4 7 | 12229.35000 | 12229.35199 | -0.00199 | 0.10000 | 0.09999 |
| 6: | 11 4 7 10 3 7 | 17438.08000 | 17438.01068 | 0.06932  | 0.10000 | 0.08673 |
| 7: | 11 4 7 10 5 6 | 12937.53000 | 12937.59571 | -0.06571 | 0.10000 | 0.08817 |
| 8: | 11 5 7 10 4 6 | 13005.76000 | 13005.76296 | -0.00296 | 0.10000 | 0.09998 |
| 9: | 13 6 7 12 6 6 | 16395.73000 | 16395.73003 | -0.00003 | 0.10000 | 0.10000 |

NORMALIZED DIAGONAL:

|   |              |   |              |   |              |   |              |   |              |   |              |
|---|--------------|---|--------------|---|--------------|---|--------------|---|--------------|---|--------------|
| 1 | 1.00000E+000 | 2 | 2.67165E-002 | 3 | 1.64167E-001 | 4 | 1.91871E-001 | 5 | 7.95603E-001 | 6 | 6.16026E-003 |
| 7 | 8.68043E-001 | 8 | 1.22055E-001 |   |              |   |              |   |              |   |              |

MARQUARDT PARAMETER = 0, TRUST EXPANSION = 1.00

NEW PARAMETER (EST. ERROR) -- CHANGE THIS ITERATION

|   |       |          |                |           |
|---|-------|----------|----------------|-----------|
| 1 | 10000 | A        | 886.788(133)   | 0.000     |
| 2 | 20000 | B        | 729.407(159)   | -0.000    |
| 3 | 30000 | C        | 441.763( 51)   | 0.000     |
| 4 | 200   | -DeltaJ  | -0.23( 70)E-03 | -0.00E-03 |
| 5 | 2000  | -DeltaK  | 1.33(220)E-03  | 0.00E-03  |
| 6 | 1100  | -DeltaJK | -0.38(259)E-03 | -0.00E-03 |
| 7 | 40100 | -deltaJ  | 1.45( 88)E-03  | 0.00E-03  |
| 8 | 41000 | -deltaK  | -8.40(242)E-03 | -0.00E-03 |

MICROWAVE AVG = 0.000002 MHz, IR AVG = 0.00000

MICROWAVE RMS = 0.046420 MHz, IR RMS = 0.00000

### HDO1\_wuduu SPFIT Output

EXP.FREQ. - CALC.FREQ. - DIFF. - EXP.ERR.- EST.ERR.-AVG. CALC.FREQ. - DIFF. - WT.

|                     |             |             |          |         |         |             |          |        |  |
|---------------------|-------------|-------------|----------|---------|---------|-------------|----------|--------|--|
| 1: 7 2 5 6 1 5      | 10748.19000 | 10748.20022 | -0.01022 | 0.10000 | 0.09994 |             |          |        |  |
| 2: 7 6 2 6 5 1      | 11770.65000 | 11770.57738 | 0.07262  | 0.10000 | 0.09696 |             |          |        |  |
| 3: 7 7 0 6 6 1      | 12427.27000 | 12427.28201 | -0.01201 | 0.10000 | 0.09992 |             |          |        |  |
| 4: 8 6 3 7 5 2      | 12864.72000 | 12864.78078 | -0.06078 | 0.10000 | 0.09788 |             |          |        |  |
| 5: 10 3 7 9 3 6     | 11488.80000 | 11488.80172 | -0.00172 | 0.10000 | 0.10000 |             |          |        |  |
| 6: 14 4 11 13 3 10  | 15065.48000 | 15065.29303 | 0.18697  | 0.10000 | 0.07765 |             |          |        |  |
| 7: 15 2 13 14 2 12  | 15319.69000 | 15319.89426 | -0.20426 | 0.10000 | 0.07346 | 15319.89129 | -0.20129 | 0.2500 |  |
| 8: 15 2 13 14 3 12  | 15319.69000 | 15319.88667 | -0.19667 | 0.10000 | 0.07346 | 15319.89129 | -0.20129 | 0.2500 |  |
| 9: 15 3 13 14 2 12  | 15319.69000 | 15319.89591 | -0.20591 | 0.10000 | 0.07346 | 15319.89129 | -0.20129 | 0.2500 |  |
| 10: 15 3 13 14 3 12 | 15319.69000 | 15319.88832 | -0.19832 | 0.10000 | 0.07346 | 15319.89129 | -0.20129 | 0.2500 |  |
| 11: 15 5 10 14 6 9  | 17277.23000 | 17277.25311 | -0.02311 | 0.10000 | 0.09969 |             |          |        |  |
| 12: 17 1 16 16 1 15 | 16492.74000 | 16492.68711 | 0.05289  | 0.10000 | 0.09840 | 16492.68711 | 0.05289  | 0.2500 |  |
| 13: 17 1 16 16 2 15 | 16492.74000 | 16492.68711 | 0.05289  | 0.10000 | 0.09840 | 16492.68711 | 0.05289  | 0.2500 |  |
| 14: 17 2 16 16 1 15 | 16492.74000 | 16492.68711 | 0.05289  | 0.10000 | 0.09840 | 16492.68711 | 0.05289  | 0.2500 |  |
| 15: 17 2 16 16 2 15 | 16492.74000 | 16492.68711 | 0.05289  | 0.10000 | 0.09840 | 16492.68711 | 0.05289  | 0.2500 |  |

NORMALIZED DIAGONAL:

|   |              |   |              |   |              |   |              |   |              |   |              |
|---|--------------|---|--------------|---|--------------|---|--------------|---|--------------|---|--------------|
| 1 | 1.00000E+000 | 2 | 5.65989E-001 | 3 | 2.22021E-001 | 4 | 1.62530E-002 | 5 | 8.29973E-001 | 6 | 5.24002E-003 |
| 7 | 9.95313E-001 | 8 | 1.37604E-001 |   |              |   |              |   |              |   |              |

MARQUARDT PARAMETER = 0, TRUST EXPANSION = 1.00

NEW PARAMETER (EST. ERROR) -- CHANGE THIS ITERATION

|   |       |          |                |           |
|---|-------|----------|----------------|-----------|
| 1 | 10000 | A        | 910.567( 99)   | 0.000     |
| 2 | 20000 | B        | 688.5752(277)  | -0.0000   |
| 3 | 30000 | C        | 456.6607(207)  | -0.0000   |
| 4 | 200   | -DeltaJ  | -1.33( 45)E-03 | -0.00E-03 |
| 5 | 2000  | -DeltaK  | -0.60( 50)E-03 | 0.00E-03  |
| 6 | 1100  | -DeltaJK | 1.48( 87)E-03  | 0.00E-03  |
| 7 | 40100 | -deltaJ  | 0.616(313)E-03 | 0.000E-03 |
| 8 | 41000 | -deltaK  | 0.81( 49)E-03  | 0.00E-03  |

MICROWAVE AVG = 0.000372 MHz, IR AVG = 0.00000

MICROWAVE RMS = 0.098897 MHz, IR RMS = 0.00000

### HDO1\_wdudu SPFIT Output

|                  | EXP.FREQ.   | - CALC.FREQ. | - DIFF.  | - EXP.ERR. | - EST.ERR. | -AVG. CALC.FREQ. | - DIFF. | - WT. |
|------------------|-------------|--------------|----------|------------|------------|------------------|---------|-------|
| 1: 7 5 2 6 4 2   | 10968.19000 | 10967.90735  | 0.28265  | 0.10000    | 0.07727    |                  |         |       |
| 2: 9 4 5 8 3 5   | 13252.90000 | 13252.76131  | 0.13869  | 0.10000    | 0.06770    |                  |         |       |
| 3: 11 4 8 10 3 8 | 16830.20000 | 16830.49077  | -0.29077 | 0.10000    | 0.07212    |                  |         |       |
| 4: 13 5 8 12 6 7 | 15244.43000 | 15244.28369  | 0.14631  | 0.10000    | 0.08113    |                  |         |       |
| 5: 14 6 9 13 6 8 | 16497.45000 | 16497.58788  | -0.13788 | 0.10000    | 0.08753    |                  |         |       |

NORMALIZED DIAGONAL:

1 1.00000E+000 2 8.95165E-001 3 9.91106E-001

MARQUARDT PARAMETER = 0, TRUST EXPANSION = 1.00

NEW PARAMETER (EST. ERROR) -- CHANGE THIS ITERATION

|   |       |   |               |         |
|---|-------|---|---------------|---------|
| 1 | 10000 | A | 900.6808( 87) | 0.0000  |
| 2 | 20000 | B | 684.1236( 32) | -0.0000 |
| 3 | 30000 | C | 469.0249( 59) | 0.0000  |

MICROWAVE AVG = 0.027801 MHz, IR AVG = 0.00000

MICROWAVE RMS = 0.211705 MHz, IR RMS = 0.00000

### HDO1\_wudud SPFIT Output

|    | EXP.FREQ. | - | CALC.FREQ. | -  | DIFF. | -  | EXP.ERR.    | -           | EST.ERR. | -       | AVG.    | CALC.FREQ. | - | DIFF. | - | WT. |
|----|-----------|---|------------|----|-------|----|-------------|-------------|----------|---------|---------|------------|---|-------|---|-----|
| 1: | 10        | 3 | 7          | 9  | 3     | 6  | 11558.26000 | 11557.89802 | 0.36198  | 0.10000 | 0.07905 |            |   |       |   |     |
| 2: | 14        | 3 | 11         | 13 | 3     | 10 | 15180.98000 | 15180.51107 | 0.46893  | 0.10000 | 0.05131 |            |   |       |   |     |
| 3: | 14        | 5 | 10         | 13 | 4     | 9  | 15844.39000 | 15844.92438 | -0.53438 | 0.10000 | 0.06336 |            |   |       |   |     |
| 4: | 15        | 2 | 13         | 14 | 2     | 12 | 15479.43000 | 15479.58633 | -0.15633 | 0.10000 | 0.08864 |            |   |       |   |     |
| 5: | 15        | 6 | 10         | 14 | 6     | 9  | 17369.22000 | 17369.24391 | -0.02391 | 0.10000 | 0.09615 |            |   |       |   |     |

NORMALIZED DIAGONAL:

1 1.00000E+000 2 3.22828E-001 3 4.15294E-001

MARQUARDT PARAMETER = 0, TRUST EXPANSION = 1.00

NEW PARAMETER (EST. ERROR) -- CHANGE THIS ITERATION

|   |       |   |               |         |
|---|-------|---|---------------|---------|
| 1 | 10000 | A | 908.057( 41)  | 0.000   |
| 2 | 20000 | B | 680.4086(263) | -0.0000 |
| 3 | 30000 | C | 464.2687( 62) | 0.0000  |

MICROWAVE AVG = 0.023260 MHz, IR AVG = 0.00000

MICROWAVE RMS = 0.363732 MHz, IR RMS = 0.00000

### HDO1\_wuudu SPFIT Output

EXP.FREQ. - CALC.FREQ. - DIFF. - EXP.ERR.- EST.ERR.-AVG. CALC.FREQ. - DIFF. - WT.

|                     |             |             |          |         |         |             |          |        |  |
|---------------------|-------------|-------------|----------|---------|---------|-------------|----------|--------|--|
| 1: 11 3 9 10 2 9    | 17201.05000 | 17202.15095 | -1.10095 | 0.10000 | 0.09377 |             |          |        |  |
| 2: 11 4 7 10 3 7    | 16977.39000 | 16977.28756 | 0.10244  | 0.10000 | 0.09682 |             |          |        |  |
| 3: 11 5 7 10 5 6    | 12943.82000 | 12942.90852 | 0.91148  | 0.10000 | 0.03882 |             |          |        |  |
| 4: 13 1 12 12 1 11  | 12776.11000 | 12777.14896 | -1.03896 | 0.10000 | 0.05615 | 12777.14857 | -1.03857 | 0.2500 |  |
| 5: 13 1 12 12 2 11  | 12776.11000 | 12777.14800 | -1.03800 | 0.10000 | 0.05615 | 12777.14857 | -1.03857 | 0.2500 |  |
| 6: 13 2 12 12 1 11  | 12776.11000 | 12777.14914 | -1.03914 | 0.10000 | 0.05615 | 12777.14857 | -1.03857 | 0.2500 |  |
| 7: 13 2 12 12 2 11  | 12776.11000 | 12777.14818 | -1.03818 | 0.10000 | 0.05615 | 12777.14857 | -1.03857 | 0.2500 |  |
| 8: 14 1 13 13 1 12  | 13681.55000 | 13683.03080 | -1.48080 | 0.10000 | 0.06136 | 13683.03073 | -1.48073 | 0.2500 |  |
| 9: 14 1 13 13 2 12  | 13681.55000 | 13683.03062 | -1.48062 | 0.10000 | 0.06136 | 13683.03073 | -1.48073 | 0.2500 |  |
| 10: 14 2 13 13 1 12 | 13681.55000 | 13683.03083 | -1.48083 | 0.10000 | 0.06136 | 13683.03073 | -1.48073 | 0.2500 |  |
| 11: 14 2 13 13 2 12 | 13681.55000 | 13683.03065 | -1.48065 | 0.10000 | 0.06136 | 13683.03073 | -1.48073 | 0.2500 |  |
| 12: 15 5 11 14 5 10 | 16606.61000 | 16604.25982 | 2.35018  | 0.10000 | 0.05905 |             |          |        |  |

NORMALIZED DIAGONAL:

1 1.00000E+000 2 3.08827E-001 3 9.45450E-001

MARQUARDT PARAMETER = 0, TRUST EXPANSION = 1.00

NEW PARAMETER (EST. ERROR) -- CHANGE THIS ITERATION

|   |       |   |                |         |
|---|-------|---|----------------|---------|
| 1 | 10000 | A | 902.591( 34)   | -0.001  |
| 2 | 20000 | B | 699.4352(119)  | 0.0005  |
| 3 | 30000 | C | 452.99646(269) | 0.00003 |

MICROWAVE AVG = -0.042691 MHz, IR AVG = 0.00000

MICROWAVE RMS = 1.344613 MHz, IR RMS = 0.00000

### HDO1\_wwdud SPFIT Output

EXP.FREQ. - CALC.FREQ. - DIFF. - EXP.ERR.- EST.ERR.-AVG. CALC.FREQ. - DIFF. - WT.

|    |               |             |             |          |         |         |
|----|---------------|-------------|-------------|----------|---------|---------|
| 1: | 7 5 3 6 4 3   | 13438.73000 | 13438.74566 | -0.01566 | 0.10000 | 0.07125 |
| 2: | 8 1 7 7 0 7   | 15105.54000 | 15105.54324 | -0.00324 | 0.10000 | 0.09894 |
| 3: | 9 6 4 8 5 4   | 17087.03000 | 17087.01444 | 0.01556  | 0.10000 | 0.07168 |
| 4: | 11 4 7 10 5 6 | 15861.09000 | 15861.09041 | -0.00041 | 0.10000 | 0.09998 |

NORMALIZED DIAGONAL:

1 1.00000E+000 2 3.69874E-001 3 9.88347E-001

MARQUARDT PARAMETER = 0, TRUST EXPANSION = 1.00

NEW PARAMETER (EST. ERROR) -- CHANGE THIS ITERATION

|   |       |   |                |         |
|---|-------|---|----------------|---------|
| 1 | 10000 | A | 1065.7455(173) | -0.0000 |
| 2 | 20000 | B | 855.9642(155)  | 0.0000  |
| 3 | 30000 | C | 569.8553(133)  | -0.0000 |

MICROWAVE AVG = -0.000937 MHz, IR AVG = 0.00000

MICROWAVE RMS = 0.011160 MHz, IR RMS = 0.00000

### HDO1\_wuwud SPFIT Output

EXP.FREQ. - CALC.FREQ. - DIFF. - EXP.ERR.- EST.ERR.-AVG. CALC.FREQ. - DIFF. - WT.

|    |                |             |             |          |         |         |
|----|----------------|-------------|-------------|----------|---------|---------|
| 1: | 9 2 8 8 1 8    | 16455.31000 | 16455.29287 | 0.01713  | 0.10000 | 0.09926 |
| 2: | 9 6 4 8 6 3    | 11759.02000 | 11759.05190 | -0.03190 | 0.10000 | 0.09741 |
| 3: | 12 3 10 11 3 9 | 14401.81000 | 14401.70485 | 0.10515  | 0.10000 | 0.06668 |
| 4: | 13 3 10 12 3 9 | 16365.20000 | 16365.28683 | -0.08683 | 0.10000 | 0.07882 |

NORMALIZED DIAGONAL:

1 1.00000E+000 2 6.95698E-001 3 9.17561E-001

MARQUARDT PARAMETER = 0, TRUST EXPANSION = 1.00

NEW PARAMETER (EST. ERROR) -- CHANGE THIS ITERATION

|   |       |   |                |         |
|---|-------|---|----------------|---------|
| 1 | 10000 | A | 1217.6054(259) | -0.0000 |
| 2 | 20000 | B | 751.8418( 67)  | 0.0000  |
| 3 | 30000 | C | 514.6696( 40)  | -0.0000 |

MICROWAVE AVG = 0.000886 MHz, IR AVG = 0.00000

MICROWAVE RMS = 0.070548 MHz, IR RMS = 0.00000

### HDO1\_wwduu SPFIT Output

EXP.FREQ. - CALC.FREQ. - DIFF. - EXP.ERR.- EST.ERR.-AVG. CALC.FREQ. - DIFF. - WT.

|    |                 |             |             |          |         |         |             |          |        |  |
|----|-----------------|-------------|-------------|----------|---------|---------|-------------|----------|--------|--|
| 1: | 8 1 7 7 0 7     | 15262.51000 | 15262.69215 | -0.18215 | 0.10000 | 0.08658 |             |          |        |  |
| 2: | 8 5 4 7 4 4     | 15447.45000 | 15447.14852 | 0.30148  | 0.10000 | 0.05613 |             |          |        |  |
| 3: | 8 8 0 7 7 1     | 17867.76000 | 17867.86359 | -0.10359 | 0.10000 | 0.09680 | 17867.85142 | -0.09142 | 0.5000 |  |
| 4: | 8 8 1 7 7 1     | 17867.76000 | 17867.83924 | -0.07924 | 0.10000 | 0.09680 | 17867.85142 | -0.09142 | 0.5000 |  |
| 5: | 14 0 14 13 1 13 | 15265.43000 | 15265.44594 | -0.01594 | 0.10000 | 0.09990 | 15265.44595 | -0.01595 | 0.5000 |  |
| 6: | 14 1 14 13 1 13 | 15265.43000 | 15265.44595 | -0.01595 | 0.10000 | 0.09990 | 15265.44595 | -0.01595 | 0.5000 |  |

NORMALIZED DIAGONAL:

1 1.00000E+000 2 8.53586E-001 3 9.99543E-001

MARQUARDT PARAMETER = 0, TRUST EXPANSION = 1.00

NEW PARAMETER (EST. ERROR) -- CHANGE THIS ITERATION

|   |       |   |                |         |
|---|-------|---|----------------|---------|
| 1 | 10000 | A | 1144.2509( 67) | -0.0000 |
| 2 | 20000 | B | 829.2658( 82)  | 0.0000  |
| 3 | 30000 | C | 529.8739( 37)  | -0.0000 |

MICROWAVE AVG = 0.002991 MHz, IR AVG = 0.00000

MICROWAVE RMS = 0.182126 MHz, IR RMS = 0.00000



### HDO1\_wwudu SPFIT Output

EXP.FREQ. - CALC.FREQ. - DIFF. - EXP.ERR.- EST.ERR.-AVG. CALC.FREQ. - DIFF. - WT.

|    |              |             |             |          |         |         |
|----|--------------|-------------|-------------|----------|---------|---------|
| 1: | 8 2 6 7 3 5  | 10813.32000 | 10812.93599 | 0.38401  | 0.10000 | 0.05089 |
| 2: | 9 1 8 8 1 7  | 11191.29000 | 11191.45277 | -0.16277 | 0.10000 | 0.09311 |
| 3: | 10 5 6 9 4 5 | 15319.69000 | 15319.69245 | -0.00245 | 0.10000 | 0.09999 |
| 4: | 10 5 6 9 5 5 | 14489.13000 | 14489.28827 | -0.15827 | 0.10000 | 0.09348 |

NORMALIZED DIAGONAL:

1 1.00000E+000 2 9.58730E-001 3 4.56030E-001

MARQUARDT PARAMETER = 0, TRUST EXPANSION = 1.00

NEW PARAMETER (EST. ERROR) -- CHANGE THIS ITERATION

|   |       |   |                |         |
|---|-------|---|----------------|---------|
| 1 | 10000 | A | 1085.7237(200) | -0.0000 |
| 2 | 20000 | B | 841.0634(135)  | 0.0000  |
| 3 | 30000 | C | 557.0169( 88)  | 0.0000  |

MICROWAVE AVG = 0.015130 MHz, IR AVG = 0.00000

MICROWAVE RMS = 0.223055 MHz, IR RMS = 0.00000

### HDO1\_wuwdu SPFIT Output

EXP.FREQ. - CALC.FREQ. - DIFF. - EXP.ERR.- EST.ERR.-AVG. CALC.FREQ. - DIFF. - WT.

|    |                 |             |             |          |         |         |
|----|-----------------|-------------|-------------|----------|---------|---------|
| 1: | 6 2 5 5 1 5     | 11035.70000 | 11035.20076 | 0.49924  | 0.10000 | 0.06971 |
| 2: | 8 4 5 7 3 5     | 14794.44000 | 14794.83965 | -0.39965 | 0.10000 | 0.08189 |
| 3: | 12 4 9 11 3 8   | 15677.86000 | 15677.64379 | 0.21621  | 0.10000 | 0.09506 |
| 4: | 14 3 11 13 3 10 | 17471.55000 | 17471.72091 | -0.17091 | 0.10000 | 0.09694 |

NORMALIZED DIAGONAL:

1 1.00000E+000 2 5.49425E-001 3 8.12874E-001

MARQUARDT PARAMETER = 0, TRUST EXPANSION = 1.00

NEW PARAMETER (EST. ERROR) -- CHANGE THIS ITERATION

|   |       |   |                |         |
|---|-------|---|----------------|---------|
| 1 | 10000 | A | 1209.1670(251) | -0.0000 |
| 2 | 20000 | B | 761.6147(121)  | 0.0000  |
| 3 | 30000 | C | 519.5340( 51)  | 0.0000  |

MICROWAVE AVG = 0.036222 MHz, IR AVG = 0.00000

MICROWAVE RMS = 0.348181 MHz, IR RMS = 0.00000

### HDO1\_wuwuu SPFIT Output

EXP.FREQ. - CALC.FREQ. - DIFF. - EXP.ERR.- EST.ERR.-AVG. CALC.FREQ. - DIFF. - WT.

|    |    |   |    |    |   |    |             |             |          |         |         |
|----|----|---|----|----|---|----|-------------|-------------|----------|---------|---------|
| 1: | 7  | 2 | 5  | 6  | 1 | 5  | 12537.47000 | 12538.63399 | -1.16399 | 0.10000 | 0.09201 |
| 2: | 10 | 4 | 7  | 9  | 4 | 6  | 13145.21000 | 13142.66661 | 2.54339  | 0.10000 | 0.05175 |
| 3: | 14 | 1 | 14 | 13 | 1 | 13 | 14886.66000 | 14887.62937 | -0.96937 | 0.10000 | 0.09453 |
| 4: | 14 | 3 | 12 | 13 | 2 | 11 | 16583.86000 | 16584.12534 | -0.26534 | 0.10000 | 0.09960 |

NORMALIZED DIAGONAL:

1 1.00000E+000 2 3.52860E-001 3 8.45927E-001

MARQUARDT PARAMETER = 0, TRUST EXPANSION = 1.00

NEW PARAMETER (EST. ERROR) -- CHANGE THIS ITERATION

|   |       |   |               |        |
|---|-------|---|---------------|--------|
| 1 | 10000 | A | 1194.235(129) | -0.000 |
| 2 | 20000 | B | 778.9241(155) | 0.0000 |
| 3 | 30000 | C | 516.6388(43)  | 0.0000 |

MICROWAVE AVG = 0.036173 MHz, IR AVG = 0.00000

MICROWAVE RMS = 1.486087 MHz, IR RMS = 0.00000

### HDO1\_wwdwd SPFIT Output

EXP.FREQ. - CALC.FREQ. - DIFF. - EXP.ERR.- EST.ERR.-AVG. CALC.FREQ. - DIFF. - WT.

|    |    |   |    |    |   |    |             |             |          |         |         |
|----|----|---|----|----|---|----|-------------|-------------|----------|---------|---------|
| 1: | 8  | 3 | 6  | 7  | 2 | 6  | 17910.85000 | 17910.82839 | 0.02161  | 0.10000 | 0.08063 |
| 2: | 11 | 1 | 10 | 10 | 2 | 9  | 15334.25000 | 15334.26571 | -0.01571 | 0.10000 | 0.09027 |
| 3: | 13 | 3 | 11 | 13 | 2 | 12 | 11151.15000 | 11151.17272 | -0.02272 | 0.10000 | 0.07830 |
| 4: | 14 | 3 | 11 | 14 | 2 | 12 | 10518.48000 | 10518.46979 | 0.01021  | 0.10000 | 0.09602 |

NORMALIZED DIAGONAL:

1 1.00000E+000 2 3.00783E-001 3 7.52088E-001

MARQUARDT PARAMETER = 0, TRUST EXPANSION = 1.00

NEW PARAMETER (EST. ERROR) -- CHANGE THIS ITERATION

|   |       |   |               |         |
|---|-------|---|---------------|---------|
| 1 | 10000 | A | 1605.513( 34) | -0.000  |
| 2 | 20000 | B | 895.2822( 81) | 0.0000  |
| 3 | 30000 | C | 627.6455( 44) | -0.0000 |

MICROWAVE AVG = -0.001656 MHz, IR AVG = 0.00000

MICROWAVE RMS = 0.018263 MHz, IR RMS = 0.00000

### HDO1\_wwwud SPFIT Output

|                | EXP.FREQ.   | - CALC.FREQ. | - DIFF.  | - EXP.ERR. | - EST.ERR. | -AVG. CALC.FREQ. | - DIFF.  | - WT.  |
|----------------|-------------|--------------|----------|------------|------------|------------------|----------|--------|
| 1: 5 5 0 4 4 1 | 12322.81000 | 12322.81856  | -0.00856 | 0.10000    | 0.09985    |                  |          |        |
| 2: 6 3 4 5 3 3 | 10628.52000 | 10628.53105  | -0.01105 | 0.10000    | 0.09975    |                  |          |        |
| 3: 7 3 5 6 2 4 | 11972.55000 | 11972.42413  | 0.12587  | 0.10000    | 0.06124    |                  |          |        |
| 4: 8 2 6 7 2 5 | 13306.15000 | 13306.23989  | -0.08989 | 0.10000    | 0.07954    | 13306.24650      | -0.09650 | 0.5000 |
| 5: 8 3 6 7 2 5 | 13306.15000 | 13306.25311  | -0.10311 | 0.10000    | 0.07954    | 13306.24650      | -0.09650 | 0.5000 |

NORMALIZED DIAGONAL:

1 1.00000E+000 2 1.09172E-001 3 8.69464E-001

MARQUARDT PARAMETER = 0, TRUST EXPANSION = 1.00

NEW PARAMETER (EST. ERROR) -- CHANGE THIS ITERATION

|   |       |   |               |        |
|---|-------|---|---------------|--------|
| 1 | 10000 | A | 1235.389(100) | 0.000  |
| 2 | 20000 | B | 1150.776(145) | -0.000 |
| 3 | 30000 | C | 667.9763(191) | 0.0000 |

MICROWAVE AVG = 0.002440 MHz, IR AVG = 0.00000

MICROWAVE RMS = 0.079608 MHz, IR RMS = 0.00000

### HDO2\_wwwwwu SPFIT Output

|                    | EXP.FREQ.   | - CALC.FREQ. | - DIFF.  | - EXP.ERR. | - EST.ERR. | -AVG. CALC.FREQ. | - DIFF. | - WT. |
|--------------------|-------------|--------------|----------|------------|------------|------------------|---------|-------|
| 1: 8 2 6 7 2 5     | 16267.10000 | 16267.08586  | 0.01414  | 0.10000    | 0.09817    |                  |         |       |
| 2: 9 1 8 8 2 7     | 15974.20000 | 15974.27427  | -0.07427 | 0.10000    | 0.05420    |                  |         |       |
| 3: 9 1 9 8 1 8     | 14550.80000 | 14550.79369  | 0.00631  | 0.10000    | 0.05499    |                  |         |       |
| 4: 9 3 7 8 3 6     | 17331.00000 | 17330.94460  | 0.05540  | 0.10000    | 0.06790    |                  |         |       |
| 5: 14 4 11 14 2 12 | 15666.59000 | 15666.59609  | -0.00609 | 0.10000    | 0.09895    |                  |         |       |

NORMALIZED DIAGONAL:

1 1.00000E+000 2 1.92701E-001 3 9.10797E-001

MARQUARDT PARAMETER = 0, TRUST EXPANSION = 1.00

NEW PARAMETER (EST. ERROR) -- CHANGE THIS ITERATION

|   |       |   |                |        |
|---|-------|---|----------------|--------|
| 1 | 10000 | A | 1975.782( 89)  | -0.000 |
| 2 | 20000 | B | 1199.1085(221) | 0.0000 |
| 3 | 30000 | C | 768.2722( 33)  | 0.0000 |

MICROWAVE AVG = -0.000904 MHz, IR AVG = 0.00000

MICROWAVE RMS = 0.042099 MHz, IR RMS = 0.00000

### HDO1\_wwwwd' SPFIT Output

EXP.FREQ. - CALC.FREQ. - DIFF. - EXP.ERR.- EST.ERR.-AVG. CALC.FREQ. - DIFF. - WT.

|     |                 |             |             |          |         |         |             |          |        |  |  |  |
|-----|-----------------|-------------|-------------|----------|---------|---------|-------------|----------|--------|--|--|--|
| 1:  | 3 3 1 2 2 1     | 10343.11000 | 10343.08323 | 0.02677  | 0.10000 | 0.09898 |             |          |        |  |  |  |
| 2:  | 5 2 4 4 1 3     | 10565.61000 | 10565.72810 | -0.11810 | 0.10000 | 0.08114 |             |          |        |  |  |  |
| 3:  | 5 3 2 4 3 1     | 11191.28000 | 11191.32074 | -0.04074 | 0.10000 | 0.09042 |             |          |        |  |  |  |
| 4:  | 5 3 3 4 2 2     | 13296.43000 | 13296.47269 | -0.04269 | 0.10000 | 0.09542 |             |          |        |  |  |  |
| 5:  | 5 3 3 4 3 2     | 10520.78000 | 10520.74243 | 0.03757  | 0.10000 | 0.07884 |             |          |        |  |  |  |
| 6:  | 6 2 5 5 1 4     | 11889.28000 | 11889.07595 | 0.20405  | 0.10000 | 0.06141 |             |          |        |  |  |  |
| 7:  | 8 0 8 7 0 7     | 13466.56000 | 13466.55660 | 0.00340  | 0.10000 | 0.08523 | 13466.67008 | -0.11008 | 0.5000 |  |  |  |
| 8:  | 8 1 8 7 0 7     | 13466.56000 | 13466.78355 | -0.22355 | 0.10000 | 0.08523 | 13466.67008 | -0.11008 | 0.5000 |  |  |  |
| 9:  | 9 1 9 8 0 8     | 15062.47000 | 15062.42603 | 0.04397  | 0.10000 | 0.09542 |             |          |        |  |  |  |
| 10: | 11 3 8 11 2 9   | 10910.24000 | 10910.23200 | 0.00800  | 0.10000 | 0.09993 |             |          |        |  |  |  |
| 11: | 14 3 12 14 2 13 | 16847.37000 | 16847.37559 | -0.00559 | 0.10000 | 0.09998 |             |          |        |  |  |  |

NORMALIZED DIAGONAL:

|   |              |   |              |   |              |   |              |   |              |   |              |
|---|--------------|---|--------------|---|--------------|---|--------------|---|--------------|---|--------------|
| 1 | 1.00000E+000 | 2 | 7.85043E-001 | 3 | 2.88522E-001 | 4 | 9.84698E-001 | 5 | 2.46418E-002 | 6 | 1.04899E-003 |
| 7 | 1.23672E-001 | 8 | 8.27073E-001 |   |              |   |              |   |              |   |              |

MARQUARDT PARAMETER = 0, TRUST EXPANSION = 1.00

NEW PARAMETER (EST. ERROR) -- CHANGE THIS ITERATION

|   |       |          |                |           |
|---|-------|----------|----------------|-----------|
| 1 | 10000 | A        | 1844.405(111)  | -0.000    |
| 2 | 20000 | B        | 1250.2226(142) | -0.0000   |
| 3 | 30000 | C        | 798.883( 42)   | 0.000     |
| 4 | 200   | -DeltaJ  | 6.2( 41)E-03   | 0.0E-03   |
| 5 | 2000  | -DeltaK  | 0.0103( 90)    | 0.0000    |
| 6 | 1100  | -DeltaJK | -0.0181(132)   | -0.0000   |
| 7 | 40100 | -deltaJ  | -5.13(238)E-03 | -0.00E-03 |
| 8 | 41000 | -deltaK  | 6.0( 80)E-03   | 0.0E-03   |

MICROWAVE AVG = 0.000318 MHz, IR AVG = 0.00000

MICROWAVE RMS = 0.086799 MHz, IR RMS = 0.00000

### HDO2\_wwwwd' SPFIT Output

|                    | EXP.FREQ.   | - CALC.FREQ. | - DIFF.  | - EXP.ERR. | - EST.ERR. | -AVG. CALC.FREQ. | - DIFF. | - WT. |
|--------------------|-------------|--------------|----------|------------|------------|------------------|---------|-------|
| 1: 5 3 2 4 2 2     | 14289.13000 | 14289.53617  | -0.40617 | 0.10000    | 0.06224    |                  |         |       |
| 2: 5 5 0 4 4 0     | 17912.50000 | 17912.17408  | 0.32592  | 0.10000    | 0.05889    |                  |         |       |
| 3: 5 5 1 4 4 0     | 17910.86000 | 17910.77981  | 0.08019  | 0.10000    | 0.05890    |                  |         |       |
| 4: 8 7 2 8 6 3     | 10670.29000 | 10670.43745  | -0.14745 | 0.10000    | 0.09587    |                  |         |       |
| 5: 13 2 11 13 1 12 | 15368.90000 | 15368.89322  | 0.00678  | 0.10000    | 0.10000    |                  |         |       |

NORMALIZED DIAGONAL:

1 1.00000E+000 2 9.98387E-001 3 5.00738E-001

MARQUARDT PARAMETER = 0, TRUST EXPANSION = 1.00

NEW PARAMETER (EST. ERROR) -- CHANGE THIS ITERATION

|   |       |   |                |         |
|---|-------|---|----------------|---------|
| 1 | 10000 | A | 1875.1602( 61) | -0.0000 |
| 2 | 20000 | B | 1229.7763( 83) | -0.0000 |
| 3 | 30000 | C | 794.7908( 75)  | -0.0000 |

MICROWAVE AVG = -0.028146 MHz, IR AVG = 0.00000

MICROWAVE RMS = 0.244709 MHz, IR RMS = 0.00000



### HDO2\_wwwwd SPFIT Output

EXP.FREQ. - CALC.FREQ. - DIFF. - EXP.ERR.- EST.ERR.-AVG. CALC.FREQ. - DIFF. - WT.

|    |   |   |   |   |   |   |             |             |          |         |         |
|----|---|---|---|---|---|---|-------------|-------------|----------|---------|---------|
| 1: | 6 | 1 | 5 | 5 | 1 | 4 | 11711.55000 | 11710.43678 | 1.11322  | 0.10000 | 0.04308 |
| 2: | 6 | 3 | 4 | 5 | 2 | 3 | 14951.57000 | 14951.72668 | -0.15668 | 0.10000 | 0.09919 |
| 3: | 7 | 1 | 7 | 6 | 1 | 6 | 11673.86000 | 11674.11715 | -0.25715 | 0.10000 | 0.09780 |
| 4: | 9 | 3 | 7 | 8 | 3 | 6 | 17573.40000 | 17573.83714 | -0.43714 | 0.10000 | 0.09355 |

NORMALIZED DIAGONAL:

1 1.00000E+000 2 9.94376E-001 3 4.95432E-001

MARQUARDT PARAMETER = 0, TRUST EXPANSION = 1.00

NEW PARAMETER (EST. ERROR) -- CHANGE THIS ITERATION

|   |       |   |                |         |
|---|-------|---|----------------|---------|
| 1 | 10000 | A | 1945.3595(290) | 0.0000  |
| 2 | 20000 | B | 1218.3171(275) | 0.0001  |
| 3 | 30000 | C | 783.1562( 94)  | -0.0000 |

MICROWAVE AVG = 0.065561 MHz, IR AVG = 0.00000

MICROWAVE RMS = 0.616652 MHz, IR RMS = 0.00000

### HDO1\_wwwwd SPFIT Output

EXP.FREQ. - CALC.FREQ. - DIFF. - EXP.ERR.- EST.ERR.-AVG. CALC.FREQ. - DIFF. - WT.

|    |               |             |             |          |         |         |
|----|---------------|-------------|-------------|----------|---------|---------|
| 1: | 4 4 0 3 3 1   | 14491.76000 | 14491.22850 | 0.53150  | 0.10000 | 0.09618 |
| 2: | 8 2 6 7 3 5   | 15569.14000 | 15567.84499 | 1.29501  | 0.10000 | 0.07450 |
| 3: | 10 1 9 9 2 8  | 17840.27000 | 17841.51817 | -1.24817 | 0.10000 | 0.07660 |
| 4: | 11 3 8 11 2 9 | 11087.17000 | 11087.67312 | -0.50312 | 0.10000 | 0.09655 |

NORMALIZED DIAGONAL:

1 1.00000E+000 2 8.55651E-001 3 9.85012E-001

MARQUARDT PARAMETER = 0, TRUST EXPANSION = 1.00

NEW PARAMETER (EST. ERROR) -- CHANGE THIS ITERATION

|   |       |   |                |        |
|---|-------|---|----------------|--------|
| 1 | 10000 | A | 1919.0414(140) | 0.0000 |
| 2 | 20000 | B | 1233.9826( 53) | 0.0000 |
| 3 | 30000 | C | 784.9006( 41)  | 0.0000 |

MICROWAVE AVG = 0.018806 MHz, IR AVG = 0.00000

MICROWAVE RMS = 0.970902 MHz, IR RMS = 0.00000

### Section 5: Double Resonance Connections

The list of connected lines below has been confirmed with double resonance techniques. Power at a frequency corresponding to one of the transitions was added to the circuit and both transitions were monitored for modulation after processing the data.

$$\begin{aligned} \text{uduud} & \quad 13_{13,1} - 12_{12,1} \longleftrightarrow 12_{12,1} - 11_{11,1} \\ \text{wduud} & \quad 9_{3,6} - 8_{4,5} \longleftrightarrow 8_{4,5} - 7_{3,5} \\ \text{wudud} & \quad 8_{3,6} - 7_{2,6} \longleftrightarrow 7_{2,6} - 6_{1,6} \\ \text{wwuwd} & \quad 8_{8,1} - 8_{5,3} \longleftrightarrow 8_{5,3} - 8_{4,5} \\ \text{wwwdd} & \quad 22_{13,10} - 22_{11,11} \longleftrightarrow 22_{11,11} - 22_{11,12} \\ \\ \text{hdo\_wduud} & \quad 10_{4,7} - 9_{4,6} \longleftrightarrow 9_{4,6} - 8_{3,5} \\ \text{hdo1\_wuwud} & \quad 10_{3,8} - 9_{2,7} \begin{cases} \nearrow 10_{3,8} - 9_{3,7} \\ \searrow 9_{2,7} - 8_{2,6} \end{cases} \\ & \quad 14_{4,11} - 13_{4,10} \longleftrightarrow 13_{4,10} - 12_{3,9} \\ \text{hdo1\_wuwuu} & \quad 14_{4,11} - 13_{3,10} \longleftrightarrow 13_{3,10} - 12_{4,9} \end{aligned}$$
